# Supplementary material for: Maternal lipid levels across pregnancy impact the umbilical cord blood lipidome and infant birth weight
Source: PubMed Central journal article supplement (PMC7449968; doi:10.1038/s41598-020-71081-z), 2020-08-26
Supplement: 41598_2020_71081_MOESM1_ESM.pdf [file 41598_2020_71081_MOESM1_ESM.pdf]

## TITLE PAGE

### **Maternal lipid levels across pregnancy impact the umbilical cord blood lipidome and infant birth weight**

Jennifer L. LaBarre<sup>1</sup>, Muraly Puttabyatappa<sup>2</sup>, Peter X.K. Song<sup>3</sup>, Jaclyn M. Goodrich<sup>4</sup>, Ling Zhou<sup>5</sup>, Thekkelnaycke M. Rajendiran<sup>6,7</sup>, Tanu Soni<sup>6</sup>, Steven E. Domino<sup>8</sup>, Marjorie C. Treadwell<sup>8</sup>, Dana C. Dolinoy<sup>1,4</sup>, Vasantha Padmanabhan<sup>1,2,4+</sup>, and Charles F. Burant<sup>1,9,+,\*</sup>

#### **Author Affiliations**

<sup>1</sup>Department of Nutritional Sciences, University of Michigan School of Public Health, Ann Arbor MI, USA

<sup>2</sup>Department of Pediatrics, University of Michigan, Ann Arbor MI, USA

<sup>3</sup>Department of Biostatistics, University of Michigan School of Public Health, Ann Arbor MI, USA

<sup>4</sup>Department of Environmental Health Sciences, University of Michigan School of Public Health, Ann Arbor MI, USA

<sup>5</sup>Center of Statistical Research, Southwestern University of Finance and Economics, Chengdu, Sichuan, China

<sup>6</sup>Michigan Regional Comprehensive Metabolomics Resource Core, Ann Arbor, MI, USA.

<sup>7</sup>Department of Pathology, Michigan Regional Comprehensive Metabolomics Resource Core, Ann Arbor, MI, USA.

<sup>8</sup>Department of Obstetrics and Gynecology, University of Michigan Medical School, Ann Arbor MI, USA

<sup>9</sup>Department of Internal Medicine, University of Michigan Medical School, Ann Arbor MI, USA

**+ These authors contributed equally to this work**

#### **\* Corresponding author information:**

Charles Burant, MD, PhD

6309 Brehm Tower

1000 Wall St.

Ann Arbor, MI, 48105-7415

Tel: 734-615-3481

Email: burantc@umich.edu

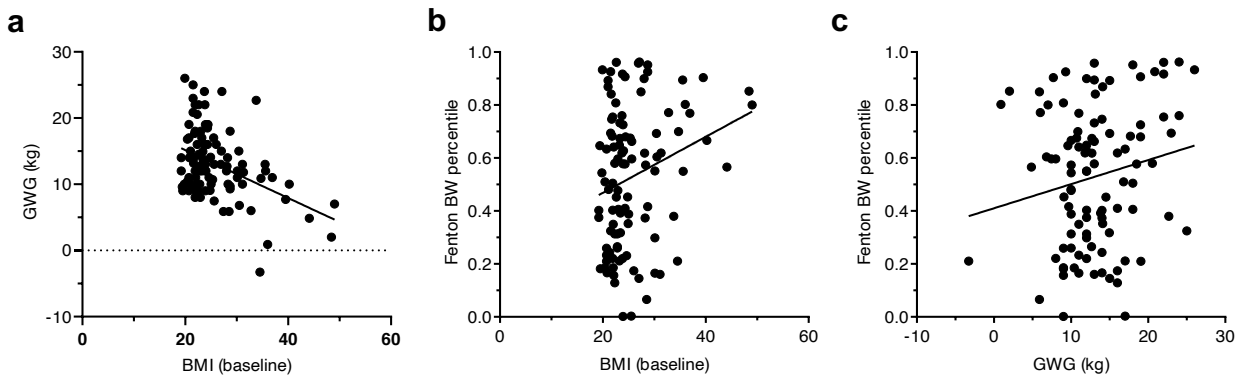

**Supplementary Figure S1. Relationship between maternal baseline BMI, gestational weight gain, and Fenton BW percentile. (a)** Maternal baseline BMI is inversely associated with gestational weight gain ( $\beta = -0.360$ ,  $r^2 = 0.18$ ,  $p < 0.001$ ). **(b)** Maternal baseline BMI is positively associated with Fenton BW percentile ( $\beta = 0.011$ ,  $r^2 = 0.06$ ,  $p = 0.0014$ ). **(c)** Maternal gestational weight gain is trending towards a positive association with Fenton BW percentile ( $\beta = 0.009$ ,  $r^2 = 0.03$ ,  $p = 0.070$ ).



**Supplementary Figure 2. Lipid groups exhibit positive correlation between M1 and M3.** Network demonstrates significant associations within time points and between time points (M1-M3 [8 edges], M1-CB [0 edges], and M3-CB [0 edges]). The relationship between lipid groups at M1, M3, and CB was estimated using Debiased Sparse Partial Correlations. Nodes were clustered organically, demonstrating connection of nodes between M1 and M3. Colors of nodes depict class of lipid. Shapes of nodes depict number of double bonds. Positive correlations are depicted using red edges. Inverse correlations are depicted using green edges. Edges represented have an adjusted p-value < 0.1.

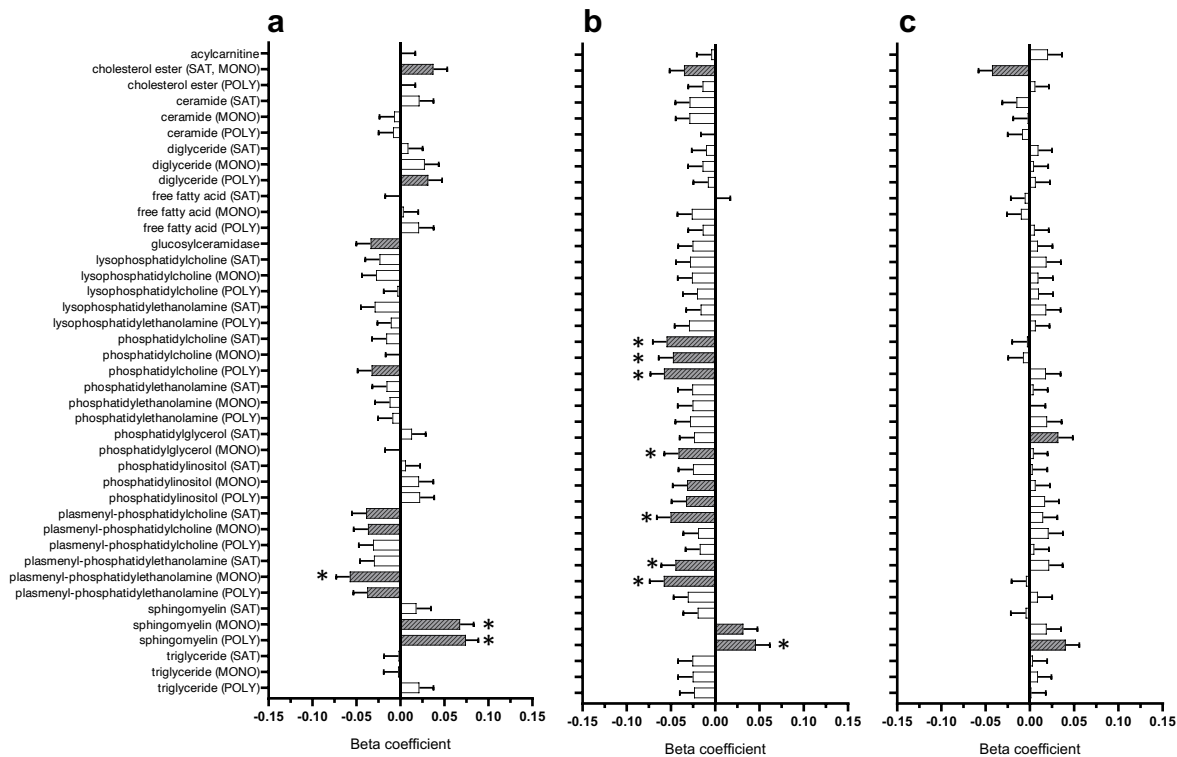

### Legend

- Combined
- Combined (unadjusted p-value <0.05)
- \* Combined (FDR < 0.1)

**Supplementary Figure S3. Associations between maternal and cord blood lipid groups with maternal BMI at baseline.** Regression models estimated the linear relationship between maternal BMI at baseline and **(a)** maternal first trimester, **(b)** maternal term, and **(c)** cord blood lipid groups, adjusting for sex, maternal age, parity, and gestational age. Beta coefficients plotted as white bars ( $\beta \pm SE$ ) with significance depicted as gray striped bars (unadjusted p-value  $\alpha=0.05$ ) and “\*” (FDR < 0.1).

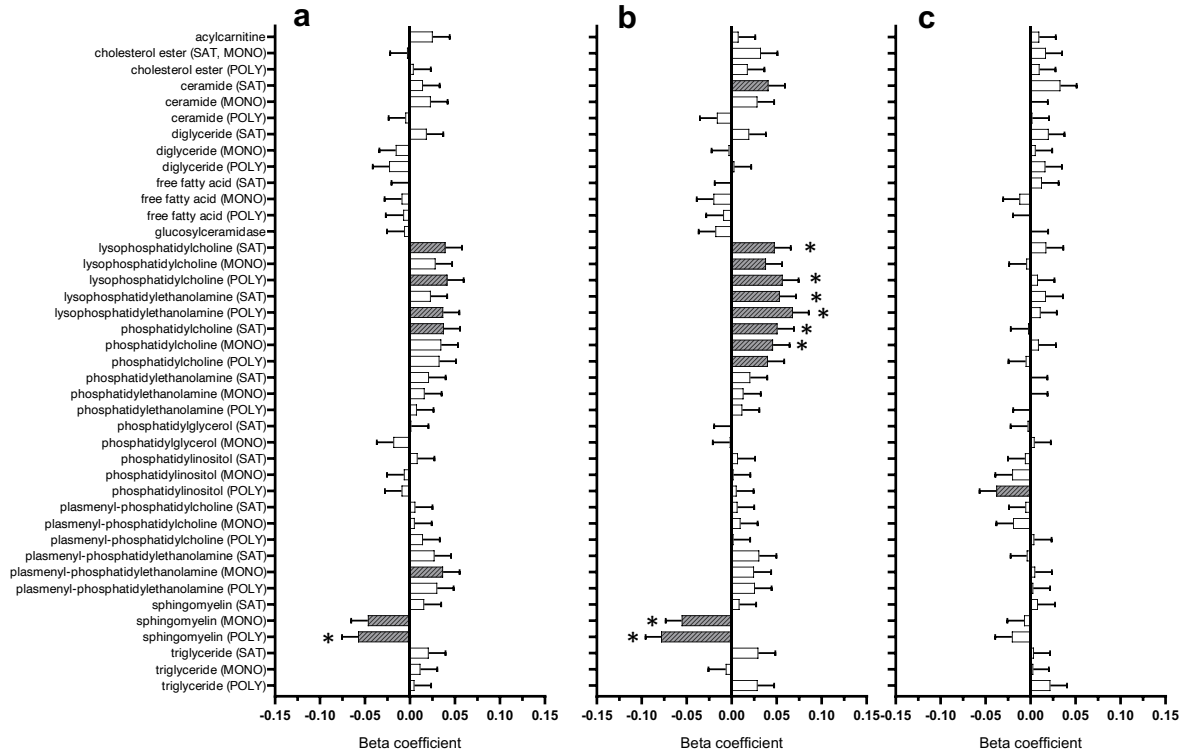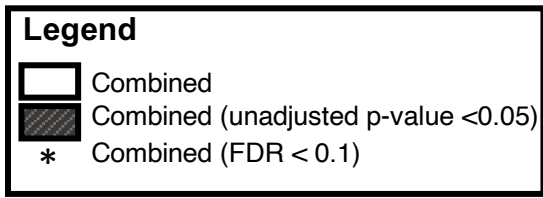

**Supplementary Figure S4. Associations between maternal and cord blood lipid groups with maternal gestational weight gain.** Regression models estimated the linear relationship between maternal GWG (kg) and **(a)** maternal first trimester, **(b)** maternal term, and **(c)** cord blood lipid groups, adjusting for sex, maternal age, parity, and gestational age. Beta coefficients plotted as white bars ( $\beta \pm \text{SE}$ ) with significance depicted as gray striped bars (unadjusted p-value  $\alpha = 0.05$ ) and “\*” (FDR < 0.1).

**Supplementary Table S1. Comparison of M1-M3 and M3-CB lipid raw peak intensities.** Paired t-tests identified differences in raw peak intensities of individual plasma lipids between M1 and M3 and M3 to CB. The fold change between lipids in M1 and M3 was calculated by  $\log_2(M3/M1)$ , where a positive FC indicates increases in that lipid between M1 and M3 and a negative FC indicates decreases in that lipid between M1 and M3. The fold change between lipids in M3 and CB was calculated by  $\log_2(CB/M3)$ , where a positive FC indicates increases in that lipid between M3 and CB and a negative FC indicates decreases in that lipid between M3 and CB. Significance highlighted in red (Bonferroni adjusted,  $\alpha=0.05/573$ ).

| Metabolite                 | M1       |          | M3       |          | CB       |          | M1 M3 t-test    |          |                              | M3 CB t-test    |          |                              |
|----------------------------|----------|----------|----------|----------|----------|----------|-----------------|----------|------------------------------|-----------------|----------|------------------------------|
|                            | Mean     | Std dev  | Mean     | Std dev  | Mean     | Std dev  | $\log_2(M3/M1)$ | p-value  | $-\log_{10}(p\text{-value})$ | $\log_2(CB/M3)$ | p-value  | $-\log_{10}(p\text{-value})$ |
| FFA(16:0)                  | 5.68E+07 | 8.07E+06 | 7.06E+07 | 1.39E+07 | 6.08E+07 | 1.22E+07 | 0.314           | 3.46E-16 | 15.461                       | -0.217          | 3.89E-09 | 8.410                        |
| FFA(18:0)                  | 6.89E+07 | 5.46E+06 | 7.23E+07 | 7.23E+06 | 6.83E+07 | 1.13E+07 | 0.071           | 1.13E-04 | 3.948                        | -0.083          | 6.06E-05 | 4.218                        |
| FFA(18:1)                  | 2.37E+07 | 1.42E+07 | 5.46E+07 | 2.45E+07 | 2.18E+07 | 9.47E+06 | 1.203           | 3.16E-23 | 22.501                       | -1.324          | 5.17E-29 | 28.287                       |
| FFA(18:2)                  | 1.62E+07 | 8.75E+06 | 3.37E+07 | 1.50E+07 | 1.43E+07 | 6.64E+06 | 1.055           | 1.29E-20 | 19.889                       | -1.232          | 7.54E-27 | 26.123                       |
| FFA(20:0)                  | 1.99E+06 | 2.46E+05 | 2.10E+06 | 3.40E+05 | 1.86E+06 | 3.80E+05 | 0.083           | 4.17E-03 | 2.380                        | -0.178          | 6.75E-08 | 7.171                        |
| FFA(20:1)                  | 4.66E+05 | 2.38E+05 | 1.34E+06 | 6.81E+05 | 3.65E+05 | 1.28E+05 | 1.526           | 3.46E-27 | 26.461                       | -1.880          | 6.52E-34 | 33.185                       |
| FFA(20:2)                  | 4.17E+05 | 2.33E+05 | 9.58E+05 | 4.24E+05 | 4.79E+05 | 1.87E+05 | 1.199           | 4.63E-24 | 23.335                       | -1.001          | 3.69E-22 | 21.433                       |
| FFA(20:4) Arachidonic acid | 1.45E+06 | 6.69E+05 | 1.73E+06 | 6.73E+05 | 2.61E+06 | 1.77E+06 | 0.260           | 2.22E-03 | 2.653                        | 0.590           | 1.24E-05 | 4.908                        |
| FFA(22:0)                  | 5.59E+05 | 1.43E+05 | 6.46E+05 | 2.71E+05 | 4.64E+05 | 1.45E+05 | 0.208           | 3.99E-03 | 2.399                        | -0.477          | 1.82E-09 | 8.741                        |
| FFA(22:1)                  | 1.41E+05 | 4.34E+04 | 2.58E+05 | 1.57E+05 | 1.19E+05 | 4.13E+04 | 0.871           | 3.09E-12 | 11.510                       | -1.118          | 1.61E-16 | 15.792                       |
| FFA(22:2)                  | 3.64E+04 | 1.30E+04 | 8.29E+04 | 3.39E+04 | 5.86E+04 | 2.78E+04 | 1.186           | 3.01E-29 | 28.521                       | -0.499          | 8.39E-07 | 6.076                        |
| FFA(22:3)                  | 4.85E+04 | 1.69E+04 | 8.90E+04 | 3.17E+04 | 1.56E+05 | 6.06E+04 | 0.877           | 2.20E-24 | 23.657                       | 0.810           | 4.24E-19 | 18.372                       |
| FFA(24:0)                  | 3.76E+05 | 1.53E+05 | 3.86E+05 | 1.73E+05 | 3.73E+05 | 1.09E+05 | 0.039           | 6.47E-01 | 0.189                        | -0.049          | 3.45E-01 | 0.462                        |
| FFA(24:1)                  | 2.62E+05 | 6.80E+04 | 3.83E+05 | 1.08E+05 | 3.24E+05 | 9.86E+04 | 0.548           | 7.64E-19 | 18.117                       | -0.243          | 1.16E-05 | 4.937                        |
| FFA(24:2)                  | 7.47E+04 | 2.29E+04 | 1.21E+05 | 3.54E+04 | 1.62E+05 | 5.02E+04 | 0.690           | 4.02E-23 | 22.396                       | 0.425           | 4.50E-10 | 9.347                        |
| FFA(24:3)                  | 1.23E+04 | 4.71E+03 | 1.72E+04 | 6.76E+03 | 4.08E+04 | 1.46E+04 | 0.487           | 3.69E-09 | 8.433                        | 1.245           | 7.19E-35 | 34.144                       |
| 16:0 Cholesteryl ester     | 4.57E+04 | 1.20E+04 | 4.72E+04 | 1.76E+04 | 4.50E+04 | 2.03E+04 | 0.046           | 4.75E-01 | 0.324                        | -0.068          | 8.88E-01 | 0.052                        |
| 16:1 Cholesteryl ester     | 2.22E+04 | 1.04E+04 | 3.32E+04 | 1.51E+04 | 6.15E+04 | 4.11E+04 | 0.582           | 2.96E-09 | 8.528                        | 0.887           | 2.88E-13 | 12.540                       |
| 17:1 Cholesteryl ester     | 6.55E+03 | 2.87E+03 | 7.14E+03 | 7.14E+03 | 7.54E+03 | 3.13E+03 | 0.123           | 1.32E-01 | 0.881                        | 0.079           | 3.77E-01 | 0.424                        |
| 18:0 Cholesteryl ester     | 1.89E+04 | 8.57E+03 | 1.78E+04 | 7.35E+03 | 2.84E+04 | 1.42E+04 | -0.083          | 3.38E-01 | 0.471                        | 0.670           | 1.49E-10 | 9.827                        |
| 18:1 Cholesteryl ester     | 5.79E+05 | 1.19E+05 | 6.98E+05 | 1.59E+05 | 4.44E+05 | 1.15E+05 | 0.269           | 3.76E-09 | 8.424                        | -0.652          | 3.31E-31 | 30.480                       |
| 18:2 Cholesteryl ester     | 3.30E+06 | 5.46E+05 | 3.19E+06 | 6.38E+05 | 1.15E+06 | 3.77E+05 | -0.048          | 1.91E-01 | 0.720                        | -1.477          | 6.08E-75 | 74.216                       |
| 18:3 Cholesteryl ester     | 1.15E+04 | 2.65E+04 | 9.06E+03 | 2.09E+04 | 2.87E+03 | 4.94E+03 | -0.339          | 4.65E-01 | 0.333                        | -1.658          | 4.15E-03 | 2.382                        |
| 20:3 Cholesteryl ester     | 3.50E+05 | 8.97E+04 | 3.10E+05 | 8.99E+04 | 3.82E+05 | 9.38E+04 | -0.175          | 1.37E-03 | 2.863                        | 0.300           | 9.52E-07 | 6.021                        |
| 20:4 Cholesteryl ester     | 1.48E+04 | 9.05E+03 | 1.67E+04 | 1.00E+04 | 9.32E+03 | 8.05E+03 | 0.175           | 1.47E-01 | 0.832                        | -0.843          | 2.14E-07 | 6.670                        |
| 20:5 Cholesteryl ester     | 9.86E+04 | 7.82E+04 | 5.35E+04 | 5.23E+04 | 4.19E+04 | 4.71E+04 | -0.883          | 1.63E-06 | 5.789                        | -0.371          | 3.27E-01 | 0.485                        |
| 22:4 Cholesteryl ester     | 1.52E+04 | 5.45E+03 | 1.17E+04 | 4.62E+03 | 1.95E+04 | 6.98E+03 | -0.384          | 6.65E-07 | 6.177                        | 0.737           | 4.07E-17 | 16.391                       |
| 22:5 Cholesteryl ester     | 4.07E+04 | 1.25E+04 | 3.39E+04 | 1.24E+04 | 7.05E+04 | 2.22E+04 | -0.263          | 1.03E-04 | 3.985                        | 1.056           | 1.38E-35 | 34.861                       |
| 22:6 Cholesteryl ester     | 2.33E+05 | 8.96E+04 | 1.77E+05 | 8.09E+04 | 2.87E+05 | 1.10E+05 | -0.398          | 3.11E-06 | 5.507                        | 0.697           | 5.82E-14 | 13.235                       |
| Acylcarnitine 16:0         | 6.54E+04 | 2.02E+04 | 6.95E+04 | 2.48E+04 | 1.10E+05 | 4.37E+04 | 0.089           | 1.81E-01 | 0.741                        | 0.666           | 1.04E-15 | 14.985                       |
| Acylcarnitine 18:0         | 3.10E+04 | 1.05E+04 | 2.88E+04 | 1.39E+04 | 3.10E+04 | 1.69E+04 | -0.108          | 1.89E-01 | 0.723                        | 0.107           | 3.94E-01 | 0.405                        |
| Acylcarnitine 18:1         | 1.22E+05 | 5.05E+04 | 1.32E+05 | 5.46E+04 | 1.04E+05 | 6.00E+04 | 0.111           | 1.79E-01 | 0.747                        | -0.345          | 3.72E-04 | 3.429                        |
| Acylcarnitine 18:2         | 7.63E+04 | 3.84E+04 | 7.12E+04 | 3.93E+04 | 8.88E+04 | 4.97E+04 | -0.100          | 3.40E-01 | 0.469                        | 0.318           | 8.42E-03 | 2.074                        |
| Acylcarnitine 24:0         | 1.82E+03 | 1.08E+03 | 1.86E+03 | 9.37E+02 | 1.15E+03 | 3.77E+05 | 0.031           | 7.77E-01 | 0.109                        | -0.690          | 2.28E-01 | 0.643                        |
| Acylcarnitine 26:0         | 2.69E+03 | 1.69E+03 | 2.53E+03 | 1.42E+03 | 1.89E+03 | 7.42E+03 | -0.090          | 4.47E-01 | 0.350                        | -0.423          | 7.19E-01 | 0.144                        |
| Cer[NDS] 34:0              | 1.07E+05 | 2.19E+04 | 1.20E+05 | 2.95E+04 | 1.32E+05 | 4.24E+04 | 0.168           | 2.68E-04 | 3.572                        | 0.135           | 4.09E-03 | 2.389                        |
| Cer[NDS] 36:0              | 3.58E+04 | 1.20E+04 | 7.37E+04 | 2.87E+04 | 7.24E+04 | 1.03E+05 | 1.042           | 4.28E-26 | 25.369                       | -0.024          | 2.21E-01 | 0.655                        |
| Cer[NDS] 38:0              | 3.60E+03 | 1.19E+03 | 5.22E+03 | 1.99E+03 | 5.68E+03 | 3.86E+03 | 0.536           | 1.19E-11 | 10.924                       | 0.123           | 2.56E-02 | 1.592                        |
| Cer[NDS] 40:0              | 3.17E+05 | 1.07E+05 | 5.04E+05 | 1.39E+05 | 2.94E+05 | 9.79E+04 | 0.667           | 1.86E-22 | 21.731                       | -0.774          | 3.12E-28 | 27.506                       |
| Cer[NDS] 41:0              | 2.10E+04 | 6.63E+03 | 3.03E+04 | 8.43E+03 | 1.26E+04 | 4.59E+03 | 0.532           | 1.61E-16 | 15.792                       | -1.271          | 2.49E-48 | 47.604                       |
| Cer[NDS] 42:0              | 5.53E+04 | 1.80E+04 | 8.59E+04 | 2.46E+04 | 8.64E+04 | 2.94E+04 | 0.637           | 1.55E-20 | 19.809                       | 0.009           | 6.42E-01 | 0.193                        |
| Cer[NDS] 42:1              | 3.19E+05 | 8.69E+04 | 4.38E+05 | 1.19E+05 | 1.19E+05 | 6.62E+04 | 0.454           | 1.85E-14 | 13.732                       | -1.877          | 1.23E-62 | 61.911                       |
| Cer[NS] 32:1               | 3.63E+04 | 1.06E+04 | 3.90E+04 | 1.14E+04 | 1.36E+04 | 6.31E+03 | 0.102           | 7.91E-02 | 1.102                        | -1.519          | 1.47E-50 | 49.833                       |
| Cer[NS] 33:1               | 2.97E+04 | 6.80E+03 | 2.79E+04 | 8.19E+03 | 3.21E+04 | 1.24E+04 | -0.095          | 6.88E-02 | 1.163                        | 0.205           | 8.26E-03 | 2.083                        |
| Cer[NS] 33:4               | 3.42E+03 | 2.51E+03 | 3.45E+03 | 2.51E+03 | 3.07E+03 | 1.29E+05 | 0.011           | 9.38E-01 | 0.028                        | -0.166          | 1.88E-01 | 0.726                        |
| Cer[NS] 34:1               | 1.59E+04 | 3.85E+03 | 2.09E+04 | 5.73E+03 | 9.68E+03 | 8.34E+03 | 0.398           | 1.56E-12 | 11.806                       | -1.112          | 2.90E-21 | 20.538                       |
| Cer[NS] 34:2               | 2.34E+04 | 6.03E+03 | 2.49E+04 | 7.48E+03 | 1.75E+04 | 9.27E+03 | 0.088           | 1.18E-01 | 0.928                        | -0.508          | 3.82E-10 | 9.418                        |
| Cer[NS] 35:1               | 1.53E+07 | 1.62E+06 | 1.37E+07 | 1.52E+06 | 1.83E+07 | 3.43E+06 | -0.161          | 2.35E-12 | 11.630                       | 0.425           | 1.51E-25 | 24.822                       |
| Cer[NS] 36:1               | 1.34E+05 | 3.17E+04 | 2.18E+05 | 6.55E+04 | 9.40E+04 | 3.96E+04 | 0.705           | 2.21E-25 | 24.655                       | -1.215          | 1.64E-40 | 39.785                       |
| Cer[NS] 36:2               | 2.02E+04 | 5.61E+03 | 2.62E+04 | 9.87E+03 | 2.05E+04 | 8.98E+03 | 0.375           | 1.45E-07 | 6.839                        | -0.358          | 1.61E-05 | 4.793                        |
| Cer[NS] 37:1               | 6.74E+04 | 1.52E+04 | 8.99E+04 | 3.30E+04 | 5.31E+04 | 1.39E+04 | 0.416           | 1.11E-09 | 8.956                        | -0.759          | 4.32E-22 | 21.364                       |
| Cer[NS] 37:4               | 1.80E+04 | 8.47E+03 | 1.51E+04 | 6.43E+03 | 6.05E+04 | 2.32E+04 | -0.258          | 4.64E-03 | 2.334                        | 2.005           | 7.52E-48 | 47.124                       |
| Cer[NS] 38:1               | 2.14E+05 | 5.79E+04 | 3.19E+05 | 8.17E+04 | 7.21E+04 | 4.33E+04 | 0.576           | 6.52E-22 | 21.186                       | -2.146          | 5.37E-72 | 71.270                       |
| Cer[NS] 38:2               | 2.88E+04 | 7.67E+03 | 4.12E+04 | 1.20E+04 | 1.90E+04 | 1.04E+04 | 0.514           | 1.77E-16 | 15.751                       | -1.114          | 7.88E-32 | 31.104                       |
| Cer[NS] 39:1               | 2.70E+05 | 7.50E+04 | 3.53E+05 | 9.12E+04 | 6.63E+04 | 3.65E+04 | 0.386           | 8.94E-12 | 11.049                       | -2.412          | 2.82E-78 | 77.550                       |
| Cer[NS] 39:2               | 3.59E+04 | 1.12E+04 | 4.50E+04 | 1.32E+04 | 1.40E+04 | 7.30E+03 | 0.326           | 1.88E-07 | 6.727                        | -1.684          | 4.55E-53 | 52.342                       |
| Cer[NS] 40:1               | 1.24E+06 | 3.51E+05 | 1.76E+06 | 4.98E+05 | 3.35E+05 | 2.32E+05 | 0.508           | 4.65E-16 | 15.333                       | -2.393          | 8.99E-70 | 69.046                       |
| Cer[NS] 40:2               | 2.29E+05 | 6.42E+04 | 2.95E+05 | 7.92E+04 | 9.43E+04 | 3.99E+04 | 0.365           | 2.34E-10 | 6.630                        | -1.646          | 7.45E-60 | 59.128                       |
| Cer[NS] 41:1               | 8.06E+04 | 2.31E+04 | 1.06E+05 | 2.94E+04 | 1.46E+04 | 1.11E+04 | 0.401           | 1.66E-11 | 10.779                       | -2.869          | 2.50E-78 | 77.602                       |
| Cer[NS] 41:2               | 4.06E+05 | 1.04E+05 | 4.99E+05 | 1.31E+05 | 1.19E+05 | 5.51E+04 | 0.298           | 3.08E-08 | 7.512                        | -2.063          | 4.53E-72 | 71.344                       |
| Cer[NS] 41:3               | 5.03E+04 | 1.54E+04 | 6.46E+04 | 2.18E+04 | 2.51E+04 | 1.15E+04 | 0.362           | 9.47E-08 | 7.024                        | -1.367          | 7.07E-41 | 40.151                       |
| Cer[NS] 42:1               | 3.19E+05 | 8.69E+04 | 4.38E+05 | 1.19E+05 | 1.19E+05 | 6.87E+04 | 0.454           | 1.85E-14 | 13.732                       | -1.877          | 5.72E-61 | 60.242                       |
| Cer[NS] 42:2               | 1.43E+06 | 3.51E+05 | 1.95E+06 | 4.83E+05 | 5.64E+05 | 2.43E+05 | 0.441           | 4.24E-16 | 15.373                       | -1.786          | 4.30E-69 | 68.367                       |
| Cer[NS] 42:3               | 8.38E+03 | 2.99E+03 | 1.10E+04 | 4.27E+03 | 5.71E+03 | 6.93E+03 | 0.389           | 6.82E-07 | 6.166                        | -0.943          | 5.09E-08 | 7.293                        |
| Cer[NS] 43:1               | 6.74E+05 | 2.14E+05 | 6.77E+05 | 2.27E+05 | 2.13E+05 | 9.93E+04 | 0.006           | 9.28E-01 | 0.032                        | -1.664          | 1.25E-48 | 47.902                       |
| Cer[NS] 43:2               | 1.56E+04 | 5.20E+03 | 1.63E+04 | 5.83E+03 | 5.95E+03 | 4.37E+03 | 0.065           | 3.48E-01 | 0.458                        | -1.452          | 1.39E-31 | 30.856                       |
| Cer[NS] 43:3               | 7.39E+03 | 2.98E+03 | 1.02E+04 | 3.55E+03 | 6.00E+03 | 2.43E+03 | 0.459           | 3.96E-09 | 8.402                        | -0.760          | 5.16E-19 | 18.287                       |
| Cer[NS] 44:1               | 2.63E+04 | 5.83E+03 | 2.62E+04 | 7.21E+03 | 2.15E+04 | 7.92E+03 | -0.009          | 8.51E-01 | 0.070                        | -0.285          | 4.68E-04 | 3.330                        |
| Cer[AS] 41:1               | 2.26E+04 | 9.70E+03 | 3.75E+04 | 1.71E+04 | 8.72E+03 | 3.36E+05 | 0.726           | 3.98E-13 | 12.401                       | -2.102          | 6.87E-01 | 0.163                        |
| Cer[AS] 42:2               | 8.56E+04 | 2.81E+04 | 9.28E+04 | 3.52E+04 | 2.13E+04 | 1.22E+04 | 0.116           | 1.02E-01 | 0.990                        | -2.124          | 6.64E-50 | 49.178                       |
| Cer[EODS] 49:1             | 4.93E+03 | 2.44E+03 | 8.42E+03 | 3.86E+03 | 3.20E+03 | 1.89E+03 | 0.772           | 1.87E-13 | 12.727                       | -1.398          | 8.10E-27 | 26.091                       |
| Cer[EODS] 53:0             | 1.03E+04 | 3.45E+03 | 7.86E+03 | 2.90E+03 | 1.28E+04 | 3.81E+03 | -0.386          | 1.06E-07 | 6.976                        | 0.706           | 1.27E-21 | 20.895                       |
| Cer[EODS] 57:2             | 9.93E+03 | 3.94E+03 | 9.66E+03 | 4.45E+03 | 3.63E+03 | 4.43E+03 | -0.040          |          |                              |                 |          |                              |

|             |          |          |          |          |          |          |        |          |        |        |          |        |
|-------------|----------|----------|----------|----------|----------|----------|--------|----------|--------|--------|----------|--------|
| DG 30:0     | 9.81E+03 | 1.07E+04 | 1.92E+04 | 1.69E+04 | 3.70E+03 | 3.23E+03 | 0.969  | 2.57E-06 | 5.591  | -2.377 | 4.07E-17 | 16.391 |
| DG 30:1     | 5.04E+03 | 4.75E+03 | 7.92E+03 | 6.32E+03 | 1.75E+03 | 2.67E+03 | 0.651  | 2.36E-04 | 3.628  | -2.180 | 5.67E-16 | 15.246 |
| DG 31:0     | 2.56E+03 | 2.31E+03 | 4.10E+03 | 2.47E+03 | 1.82E+03 | 1.18E+03 | 0.680  | 4.77E-06 | 5.321  | -1.174 | 2.52E-15 | 14.599 |
| DG 32:0     | 2.57E+04 | 2.42E+04 | 7.25E+04 | 5.16E+04 | 1.46E+04 | 1.99E+04 | 1.496  | 4.77E-15 | 14.321 | -2.310 | 1.06E-20 | 19.976 |
| DG 32:1     | 3.57E+04 | 2.92E+04 | 8.35E+04 | 5.58E+04 | 1.70E+04 | 1.68E+05 | 1.225  | 2.70E-13 | 12.569 | -2.299 | 1.13E-02 | 1.948  |
| DG 32:2     | 1.56E+04 | 1.04E+04 | 2.62E+04 | 1.35E+04 | 5.03E+03 | 1.01E+05 | 0.746  | 1.10E-09 | 8.959  | -2.378 | 4.26E-01 | 0.371  |
| DG 33:0     | 3.24E+03 | 2.15E+03 | 5.29E+03 | 2.92E+03 | 2.17E+03 | 1.11E+03 | 0.709  | 2.10E-08 | 7.677  | -1.285 | 1.01E-19 | 18.997 |
| DG 33:1     | 6.15E+03 | 4.88E+03 | 1.15E+04 | 6.45E+03 | 2.67E+03 | 2.37E+03 | 0.901  | 1.13E-10 | 9.946  | -2.105 | 1.44E-28 | 27.842 |
| DG 34:0     | 2.57E+04 | 1.47E+04 | 4.58E+04 | 2.29E+04 | 1.85E+04 | 9.80E+03 | 0.835  | 8.80E-13 | 12.056 | -1.304 | 8.87E-23 | 22.052 |
| DG 34:2     | 1.39E+05 | 7.30E+04 | 3.33E+05 | 1.56E+05 | 6.04E+04 | 4.52E+04 | 1.257  | 2.19E-24 | 23.660 | -2.464 | 7.13E-43 | 42.147 |
| DG 34:3     | 3.50E+04 | 1.82E+04 | 6.81E+04 | 2.90E+04 | 1.58E+04 | 1.03E+04 | 0.961  | 2.10E-19 | 18.678 | -2.112 | 4.55E-43 | 42.342 |
| DG 35:1     | 6.72E+03 | 3.75E+03 | 1.18E+04 | 5.17E+03 | 2.72E+03 | 1.59E+03 | 0.812  | 2.52E-14 | 13.599 | -2.116 | 2.66E-42 | 41.574 |
| DG 35:2     | 7.43E+03 | 3.41E+03 | 1.36E+04 | 6.14E+03 | 2.82E+03 | 3.33E+05 | 0.869  | 1.45E-16 | 15.840 | -2.268 | 2.85E-01 | 0.545  |
| DG 35:3     | 4.03E+03 | 2.12E+03 | 6.92E+03 | 3.10E+03 | 1.53E+03 | 1.15E+03 | 0.780  | 1.28E-13 | 12.894 | -2.174 | 4.91E-41 | 40.309 |
| DG 36:0     | 1.17E+04 | 3.30E+03 | 1.31E+04 | 3.47E+03 | 1.13E+04 | 1.60E+04 | 0.167  | 2.38E-03 | 2.623  | -0.218 | 9.04E-01 | 0.044  |
| DG 36:1     | 4.31E+04 | 2.17E+04 | 8.75E+04 | 4.14E+04 | 1.99E+04 | 1.55E+04 | 1.023  | 6.93E-19 | 18.159 | -2.138 | 1.38E-37 | 36.861 |
| DG 36:2     | 2.14E+05 | 8.10E+04 | 4.33E+05 | 2.02E+05 | 7.17E+04 | 5.57E+04 | 1.015  | 1.61E-20 | 19.792 | -2.595 | 3.29E-44 | 43.483 |
| DG 36:3     | 2.49E+05 | 9.74E+04 | 4.97E+05 | 2.38E+05 | 6.35E+04 | 4.86E+04 | 0.996  | 2.80E-19 | 18.553 | -2.969 | 3.37E-46 | 45.472 |
| DG 36:4     | 1.65E+05 | 7.44E+04 | 2.68E+05 | 1.15E+05 | 4.58E+04 | 3.29E+04 | 0.704  | 2.90E-13 | 12.538 | -2.550 | 1.13E-48 | 47.946 |
| DG 36:5     | 1.99E+04 | 1.04E+04 | 2.72E+04 | 1.26E+04 | 7.46E+03 | 4.70E+03 | 0.447  | 8.37E-06 | 5.077  | -1.865 | 1.45E-35 | 34.839 |
| DG 38:0     | 1.91E+03 | 1.05E+03 | 2.18E+03 | 1.29E+03 | 1.53E+03 | 3.20E+03 | 0.192  | 9.33E-02 | 1.030  | -0.516 | 4.90E-01 | 0.309  |
| DG 38:1     | 8.37E+03 | 4.37E+03 | 1.00E+04 | 5.02E+03 | 2.73E+03 | 1.70E+03 | 0.257  | 1.24E-02 | 1.907  | -1.871 | 7.37E-32 | 31.133 |
| DG 38:2     | 9.77E+03 | 3.62E+03 | 2.18E+04 | 9.99E+03 | 3.15E+03 | 4.41E+03 | 1.158  | 4.64E-28 | 27.334 | -2.791 | 4.74E-47 | 46.324 |
| DG 38:3     | 1.33E+04 | 4.85E+03 | 2.52E+04 | 8.48E+03 | 8.01E+03 | 6.31E+03 | 0.918  | 6.15E-24 | 23.211 | -1.652 | 8.82E-37 | 36.054 |
| DG 38:4     | 2.09E+04 | 7.51E+03 | 3.53E+04 | 1.28E+04 | 2.04E+04 | 2.13E+04 | 0.756  | 1.68E-19 | 18.775 | -0.792 | 1.32E-09 | 8.881  |
| DG 38:5     | 3.91E+04 | 2.01E+04 | 6.20E+04 | 2.42E+04 | 2.80E+04 | 2.04E+05 | 0.664  | 1.96E-12 | 11.708 | -1.147 | 7.22E-01 | 0.142  |
| DG 38:6     | 3.47E+04 | 1.92E+04 | 5.16E+04 | 2.16E+04 | 2.54E+04 | 1.89E+04 | 0.572  | 7.70E-09 | 8.114  | -1.021 | 3.41E-16 | 15.467 |
| DG 38:7     | 4.72E+03 | 3.52E+03 | 5.74E+03 | 4.20E+03 | 3.65E+03 | 3.45E+03 | 0.282  | 5.64E-02 | 1.249  | -0.652 | 1.46E-03 | 2.837  |
| DG 40:7     | 1.39E+04 | 8.78E+03 | 2.38E+04 | 1.38E+04 | 1.38E+04 | 9.38E+03 | 0.775  | 2.41E-09 | 8.619  | -0.792 | 1.88E-08 | 7.725  |
| DG 40:8     | 6.18E+03 | 4.52E+03 | 9.19E+03 | 6.13E+03 | 5.53E+03 | 3.62E+03 | 0.572  | 6.62E-05 | 4.179  | -0.733 | 8.60E-07 | 6.066  |
| LysoPC 14:0 | 3.99E+04 | 1.99E+04 | 2.54E+04 | 1.39E+04 | 4.28E+04 | 1.52E+04 | -0.652 | 3.78E-09 | 8.423  | 0.751  | 3.14E-17 | 16.503 |
| LysoPC 15:0 | 5.10E+04 | 1.94E+04 | 2.80E+04 | 1.18E+04 | 2.76E+04 | 1.06E+04 | -0.868 | 6.30E-21 | 20.201 | -0.019 | 7.25E-01 | 0.140  |
| LysoPC 16:0 | 5.11E+06 | 1.26E+06 | 3.79E+06 | 1.21E+06 | 3.75E+06 | 1.18E+06 | -0.433 | 2.58E-13 | 12.589 | -0.015 | 5.55E-01 | 0.255  |
| LysoPC 16:1 | 9.38E+04 | 4.87E+04 | 6.13E+04 | 3.52E+04 | 2.61E+05 | 8.48E+04 | -0.615 | 7.06E-08 | 7.151  | 2.091  | 5.46E-56 | 55.263 |
| LysoPC 17:0 | 1.71E+06 | 1.72E+05 | 1.59E+06 | 1.36E+05 | 1.63E+06 | 2.82E+05 | -0.102 | 1.38E-07 | 6.861  | 0.037  | 6.88E-01 | 0.162  |
| LysoPC 17:1 | 2.28E+04 | 7.89E+03 | 1.45E+04 | 5.35E+03 | 2.55E+04 | 7.75E+03 | -0.654 | 1.62E-16 | 15.790 | 0.813  | 5.30E-26 | 25.276 |
| LysoPC 18:0 | 3.87E+06 | 1.24E+06 | 2.50E+06 | 1.85E+06 | 1.97E+06 | 7.39E+05 | -0.628 | 1.43E-09 | 8.844  | -0.343 | 4.28E-03 | 2.369  |
| LysoPC 18:1 | 1.81E+06 | 5.76E+05 | 1.09E+06 | 5.57E+05 | 1.55E+06 | 4.69E+05 | -0.730 | 3.46E-17 | 16.461 | 0.506  | 3.83E-09 | 8.417  |
| LysoPC 18:2 | 2.12E+06 | 9.32E+05 | 8.57E+05 | 3.15E+05 | 1.47E+06 | 4.84E+05 | -1.309 | 1.62E-29 | 28.791 | 0.775  | 1.92E-20 | 19.716 |
| LysoPC 18:3 | 2.71E+04 | 1.22E+04 | 1.50E+04 | 6.29E+03 | 2.69E+04 | 7.91E+03 | -0.851 | 1.14E-16 | 15.943 | 0.839  | 1.73E-24 | 23.763 |
| LysoPC 19:0 | 3.41E+04 | 8.11E+03 | 2.59E+04 | 8.42E+03 | 2.56E+04 | 8.37E+03 | -0.397 | 9.64E-12 | 11.016 | -0.016 | 5.31E-01 | 0.275  |
| LysoPC 19:1 | 1.08E+04 | 3.58E+03 | 7.28E+03 | 4.33E+03 | 7.47E+03 | 3.02E+03 | -0.573 | 5.56E-10 | 9.255  | 0.037  | 8.20E-01 | 0.086  |
| LysoPC 20:0 | 2.18E+04 | 7.88E+03 | 1.35E+04 | 6.94E+03 | 1.15E+04 | 3.80E+03 | -0.696 | 2.77E-14 | 13.558 | -0.222 | 1.10E-02 | 1.958  |
| LysoPC 20:1 | 3.83E+04 | 1.54E+04 | 2.61E+04 | 1.76E+04 | 1.88E+04 | 6.19E+03 | -0.556 | 1.86E-07 | 6.730  | -0.474 | 9.33E-05 | 4.030  |
| LysoPC 20:2 | 2.99E+04 | 1.01E+04 | 1.85E+04 | 1.04E+04 | 3.23E+04 | 1.24E+04 | -0.692 | 5.50E-14 | 13.260 | 0.807  | 4.84E-15 | 14.316 |
| LysoPC 20:3 | 2.20E+05 | 8.09E+04 | 1.29E+05 | 6.74E+04 | 5.36E+05 | 1.75E+05 | -0.781 | 3.46E-16 | 15.461 | 2.059  | 2.63E-55 | 54.570 |
| LysoPC 20:4 | 5.37E+05 | 2.00E+05 | 2.78E+05 | 1.99E+05 | 1.85E+06 | 6.44E+05 | -0.947 | 8.73E-18 | 17.059 | 2.734  | 1.55E-60 | 59.811 |
| LysoPC 20:5 | 1.28E+05 | 7.98E+04 | 7.71E+04 | 5.79E+04 | 9.50E+04 | 5.31E+04 | -0.736 | 2.23E-07 | 6.652  | 0.301  | 3.93E-02 | 1.406  |
| LysoPC 22:0 | 9.32E+03 | 4.06E+03 | 6.36E+03 | 3.83E+03 | 5.09E+03 | 3.04E+03 | -0.552 | 1.28E-07 | 6.894  | -0.322 | 4.39E-02 | 1.358  |
| LysoPC 22:4 | 1.93E+04 | 8.41E+03 | 1.33E+04 | 9.91E+03 | 3.78E+04 | 6.30E+04 | -0.544 | 2.89E-06 | 5.539  | 1.509  | 3.49E-07 | 6.457  |
| LysoPC 22:5 | 3.69E+04 | 1.45E+04 | 2.24E+04 | 1.22E+04 | 5.23E+04 | 1.99E+04 | -0.718 | 2.18E-13 | 12.662 | 1.219  | 2.81E-28 | 27.551 |
| LysoPC 22:6 | 1.06E+05 | 4.29E+04 | 6.59E+04 | 2.97E+04 | 1.73E+05 | 5.89E+04 | -0.691 | 9.88E-14 | 13.005 | 1.397  | 1.68E-39 | 38.774 |
| LysoPC 24:0 | 1.60E+04 | 5.61E+03 | 1.13E+04 | 4.50E+03 | 1.35E+04 | 3.71E+03 | -0.504 | 1.21E-10 | 9.916  | 0.253  | 1.47E-04 | 3.833  |
| LysoPC 24:1 | 5.54E+03 | 2.03E+03 | 3.98E+03 | 1.61E+03 | 6.06E+03 | 2.06E+05 | -0.477 | 2.75E-09 | 8.561  | 0.605  | 1.52E-01 | 0.817  |
| LysoPC 24:4 | 1.71E+03 | 1.13E+03 | 1.66E+03 | 1.05E+03 | 6.45E+03 | 2.51E+04 | -0.038 | 7.65E-01 | 0.116  | 1.959  | 8.66E-04 | 3.063  |
| LysoPC 26:0 | 4.15E+03 | 1.86E+03 | 2.58E+03 | 1.46E+03 | 8.25E+03 | 7.06E+03 | -0.682 | 1.08E-10 | 9.968  | 1.675  | 7.74E-18 | 17.111 |
| LysoPC 26:1 | 3.10E+03 | 1.43E+03 | 2.29E+03 | 1.25E+03 | 5.25E+03 | 3.94E+03 | -0.435 | 1.91E-05 | 4.718  | 1.195  | 9.89E-16 | 15.047 |
| LysoPC 26:2 | 1.97E+03 | 1.02E+03 | 1.50E+03 | 9.88E+02 | 3.95E+03 | 1.45E+03 | -0.391 | 8.22E-04 | 3.085  | 1.393  | 1.02E-35 | 34.991 |
| LysoPC 26:4 | 3.24E+03 | 1.33E+03 | 3.44E+03 | 1.53E+03 | 6.39E+03 | 2.56E+04 | 0.087  | 3.10E-01 | 0.508  | 0.894  | 1.02E-02 | 1.991  |
| LysoPE 16:0 | 1.55E+05 | 6.14E+04 | 1.55E+05 | 6.77E+04 | 1.28E+05 | 4.68E+04 | -0.004 | 9.63E-01 | 0.016  | -0.273 | 3.38E-04 | 3.472  |
| LysoPE 18:0 | 8.39E+04 | 2.66E+04 | 8.77E+04 | 4.12E+04 | 5.51E+04 | 1.64E+04 | 0.064  | 4.27E-01 | 0.369  | -0.672 | 2.24E-12 | 11.650 |
| LysoPE 18:1 | 1.95E+05 | 8.73E+04 | 1.46E+05 | 6.46E+04 | 9.01E+04 | 3.11E+04 | -0.424 | 4.32E-06 | 5.364  | -0.693 | 2.23E-14 | 13.652 |
| LysoPE 18:2 | 2.06E+05 | 1.18E+05 | 1.02E+05 | 4.49E+04 | 1.04E+05 | 4.05E+04 | -1.011 | 3.51E-15 | 14.454 | 0.017  | 8.95E-01 | 0.048  |
| LysoPE 20:3 | 3.49E+04 | 1.69E+04 | 2.02E+04 | 1.07E+04 | 5.71E+04 | 2.20E+05 | -0.790 | 1.06E-12 | 11.974 | 1.502  | 1.98E-03 | 2.704  |
| LysoPE 20:4 | 1.67E+05 | 6.62E+04 | 8.94E+04 | 3.36E+04 | 3.23E+05 | 1.23E+05 | -0.897 | 1.35E-21 | 20.870 | 1.851  | 1.64E-45 | 44.785 |
| LysoPE 22:5 | 4.24E+04 | 1.93E+04 | 3.50E+04 | 1.80E+04 | 7.44E+04 | 2.99E+05 | -0.279 | 3.97E-03 | 2.401  | 1.090  | 6.95E-03 | 2.158  |
| LysoPE 22:6 | 6.29E+04 | 2.52E+04 | 5.04E+04 | 1.80E+04 | 1.53E+05 | 5.94E+04 | -0.320 | 4.62E-05 | 4.335  | 1.607  | 3.66E-44 | 43.436 |
| LysoPE 24:0 | 9.07E+03 | 3.88E+03 | 7.91E+03 | 4.07E+03 | 8.04E+03 | 4.32E+03 | -0.198 | 3.39E-02 | 1.469  | 0.023  | 4.06E-01 | 0.392  |
| PA 34:1     | 9.75E+03 | 7.24E+03 | 9.89E+03 | 6.66E+03 | 8.59E+03 | 4.74E+03 | 0.020  | 8.89E-01 | 0.051  | -0.203 | 2.04E-01 | 0.690  |
| PA 34:2     | 1.64E+04 | 5.27E+03 | 1.35E+04 | 4.59E+03 | 8.23E+03 | 3.30E+03 | -0.281 | 2.84E-05 | 4.546  | -0.715 | 1.96E-17 | 16.708 |
| PA 36:4     | 9.95E+03 | 3.41E+03 | 9.76E+03 | 4.57E+03 | 7.08E+03 | 5.22E+03 | -0.028 | 7.30E-01 | 0.137  | -0.463 | 1.48E-03 | 2.829  |
| PA 38:6     | 7.13E+03 | 4.15E+03 | 7.91E+03 | 3.48E+03 | 4.24E+03 | 2.24E+03 | 0.150  | 1.40E-01 | 0.854  | -0.901 | 1.12E-15 | 14.949 |
| PC 22:0     | 1.59E+03 | 1.41E+03 | 1.35E+03 | 1.31E+03 | 1.50E+03 | 9.51E+03 | -0.237 | 1.99E-01 | 0.701  | 0.161  | 1.43E-01 | 0.844  |
| PC 23:0     | 1.85E+03 | 1.21E+03 | 2.02E+03 | 1.22E+03 | 1.68E+03 | 9.87E+04 | 0.126  | 3.13E-01 | 0.505  | -0.268 | 1.81E-01 | 0.743  |
| PC 24:0     | 4.10E+03 | 4.20E+03 | 2.87E+03 | 2.12E+03 | 1.76E+03 | 1.54E+04 | -0.516 | 7.52E-03 | 2.124  | -0.705 | 5.14E-01 | 0.289  |
| PC 25:1     | 2.28E+03 | 3.17E+03 | 1.50E+03 | 1.35E+03 | 1.67E+03 | 2.23E+05 | -0.600 | 2.16E-02 | 1.666  | 0.156  | 1.55E-01 | 0.810  |
| PC 26:0     | 1.28E+04 | 1.35E+04 |          |          |          |          |        |          |        |        |          |        |



|          |          |          |          |          |          |          |        |          |        |        |          |        |
|----------|----------|----------|----------|----------|----------|----------|--------|----------|--------|--------|----------|--------|
| PC 33:1  | 8.58E+04 | 4.12E+04 | 1.01E+05 | 3.96E+04 | 3.06E+04 | 1.81E+04 | 0.237  | 6.33E-03 | 2.198  | -1.726 | 7.63E-41 | 40.117 |
| PC 33:2  | 5.05E+05 | 1.75E+05 | 1.01E+06 | 3.15E+05 | 8.49E+04 | 1.56E+05 | 1.004  | 1.96E-33 | 32.708 | -3.575 | 5.42E-71 | 70.266 |
| PC 33:3  | 3.83E+04 | 1.32E+04 | 4.32E+04 | 1.43E+04 | 9.80E+03 | 6.83E+03 | 0.174  | 1.00E-02 | 1.999  | -2.139 | 1.33E-55 | 54.875 |
| PC 34:0  | 4.29E+05 | 1.14E+05 | 5.48E+05 | 2.09E+05 | 4.21E+05 | 1.36E+05 | 0.356  | 5.40E-07 | 6.267  | -0.382 | 6.19E-08 | 7.208  |
| PC 34:1  | 1.99E+06 | 1.21E+06 | 3.89E+06 | 2.85E+06 | 8.24E+05 | 3.95E+05 | 0.964  | 1.64E-09 | 8.784  | -2.239 | 1.05E-22 | 21.977 |
| PC 34:2  | 1.05E+07 | 1.92E+07 | 8.78E+07 | 2.18E+08 | 5.95E+06 | 1.33E+07 | 3.068  | 3.38E-04 | 3.471  | -3.883 | 1.47E-04 | 3.834  |
| PC 34:3  | 3.37E+06 | 8.83E+05 | 4.51E+06 | 1.16E+06 | 6.66E+05 | 5.60E+05 | 0.417  | 8.90E-14 | 13.051 | -2.759 | 7.68E-79 | 78.115 |
| PC 34:4  | 4.91E+05 | 2.05E+05 | 5.28E+05 | 2.02E+05 | 7.45E+04 | 5.15E+04 | 0.104  | 1.91E-01 | 0.720  | -2.827 | 9.13E-58 | 57.039 |
| PC 34:5  | 1.11E+04 | 8.95E+03 | 9.07E+03 | 7.99E+03 | 2.09E+03 | 4.36E+04 | -0.287 | 8.74E-02 | 1.058  | -2.114 | 8.24E-01 | 0.084  |
| PC 35:1  | 3.78E+04 | 2.42E+04 | 3.47E+04 | 1.01E+04 | 1.50E+04 | 2.98E+04 | -0.121 | 2.34E-01 | 0.631  | -1.208 | 1.88E-07 | 6.726  |
| PC 35:2  | 1.06E+05 | 5.47E+04 | 1.14E+05 | 5.57E+04 | 2.91E+04 | 2.58E+04 | 0.099  | 3.20E-01 | 0.495  | -1.965 | 1.60E-32 | 31.795 |
| PC 35:3  | 2.56E+05 | 5.62E+04 | 2.22E+05 | 4.20E+04 | 9.25E+04 | 2.87E+04 | -0.209 | 9.09E-07 | 6.041  | -1.260 | 5.01E-69 | 68.301 |
| PC 35:4  | 3.41E+05 | 1.00E+05 | 2.94E+05 | 8.74E+04 | 1.18E+05 | 3.74E+04 | -0.212 | 3.82E-04 | 3.418  | -1.314 | 8.56E-49 | 48.068 |
| PC 35:5  | 2.97E+04 | 1.89E+04 | 2.69E+04 | 1.67E+04 | 6.42E+03 | 4.29E+03 | -0.143 | 2.53E-01 | 0.596  | -2.067 | 3.91E-26 | 25.408 |
| PC 35:6  | 3.24E+05 | 1.32E+05 | 6.11E+05 | 1.79E+05 | 2.33E+05 | 1.25E+05 | 0.916  | 1.15E-29 | 28.938 | -1.389 | 1.69E-44 | 43.773 |
| PC 35:7  | 1.28E+04 | 6.29E+03 | 2.64E+04 | 1.07E+04 | 5.45E+03 | 3.16E+05 | 1.042  | 3.56E-23 | 22.449 | -2.274 | 5.08E-01 | 0.295  |
| PC 36:0  | 1.38E+05 | 3.98E+04 | 1.48E+05 | 4.18E+04 | 1.08E+05 | 3.67E+04 | 0.101  | 7.41E-02 | 1.130  | -0.456 | 3.86E-13 | 12.414 |
| PC 36:1  | 3.31E+06 | 9.70E+05 | 4.02E+06 | 1.07E+06 | 2.18E+06 | 6.37E+05 | 0.280  | 9.13E-07 | 6.040  | -0.884 | 6.05E-37 | 36.218 |
| PC 36:2  | 4.42E+05 | 7.54E+05 | 7.46E+05 | 1.48E+06 | 1.72E+05 | 2.01E+06 | 0.756  | 6.00E-02 | 1.222  | -2.115 | 2.20E-01 | 0.657  |
| PC 36:3  | 2.90E+06 | 5.33E+05 | 3.29E+06 | 6.56E+05 | 1.47E+06 | 3.61E+05 | 0.179  | 5.40E-06 | 5.268  | -1.159 | 5.35E-66 | 65.271 |
| PC 36:4  | 3.39E+06 | 8.01E+05 | 3.52E+06 | 7.28E+05 | 2.38E+06 | 6.53E+05 | 0.051  | 2.43E-01 | 0.615  | -0.561 | 7.09E-27 | 26.150 |
| PC 36:5  | 2.18E+04 | 6.35E+04 | 1.34E+04 | 3.57E+04 | 9.62E+03 | 1.62E+04 | -0.700 | 2.38E-01 | 0.623  | -0.478 | 3.57E-01 | 0.447  |
| PC 36:6  | 2.56E+05 | 1.13E+05 | 2.71E+05 | 1.26E+05 | 5.30E+04 | 3.25E+04 | 0.083  | 3.61E-01 | 0.443  | -2.353 | 4.61E-42 | 41.336 |
| PC 36:7  | 5.00E+04 | 1.61E+04 | 4.55E+04 | 1.24E+04 | 1.22E+04 | 6.76E+05 | -0.135 | 2.51E-02 | 1.600  | -1.901 | 3.66E-01 | 0.436  |
| PC 37:1  | 3.78E+04 | 1.43E+04 | 3.79E+04 | 1.22E+04 | 2.21E+04 | 9.09E+03 | 0.003  | 9.63E-01 | 0.016  | -0.779 | 9.70E-22 | 21.013 |
| PC 37:2  | 5.18E+04 | 3.34E+04 | 5.13E+04 | 3.66E+04 | 3.33E+04 | 2.46E+04 | -0.013 | 9.21E-01 | 0.036  | -0.626 | 1.04E-04 | 3.984  |
| PC 37:3  | 7.08E+04 | 3.42E+04 | 6.88E+04 | 3.05E+04 | 4.35E+04 | 2.17E+04 | -0.042 | 6.49E-01 | 0.188  | -0.663 | 1.56E-11 | 10.807 |
| PC 37:4  | 6.32E+05 | 2.21E+05 | 4.73E+05 | 1.74E+05 | 3.55E+05 | 1.47E+05 | -0.419 | 2.11E-08 | 7.676  | -0.412 | 8.78E-08 | 7.057  |
| PC 37:5  | 9.04E+04 | 3.49E+04 | 1.79E+05 | 5.53E+04 | 3.94E+04 | 5.17E+04 | 0.987  | 7.36E-32 | 31.133 | -2.188 | 4.50E-46 | 45.347 |
| PC 37:6  | 1.70E+05 | 6.28E+04 | 1.49E+05 | 5.64E+04 | 4.81E+04 | 1.63E+04 | -0.195 | 9.11E-03 | 2.040  | -1.630 | 1.25E-43 | 42.903 |
| PC 37:7  | 5.07E+04 | 2.20E+04 | 8.81E+04 | 2.84E+04 | 2.73E+04 | 1.54E+04 | 0.798  | 1.04E-21 | 20.981 | -1.690 | 2.90E-49 | 48.538 |
| PC 38:1  | 5.42E+04 | 1.49E+04 | 5.84E+04 | 1.49E+04 | 2.87E+04 | 2.76E+04 | 0.107  | 4.19E-02 | 1.378  | -1.024 | 8.01E-16 | 15.096 |
| PC 38:2  | 1.48E+05 | 3.85E+04 | 1.51E+05 | 4.51E+04 | 1.28E+05 | 1.75E+05 | 0.036  | 5.19E-01 | 0.285  | -0.241 | 9.65E-01 | 0.015  |
| PC 38:3  | 1.18E+06 | 3.13E+05 | 1.10E+06 | 2.54E+05 | 1.27E+06 | 2.81E+05 | -0.100 | 4.49E-02 | 1.348  | 0.212  | 5.09E-05 | 4.293  |
| PC 38:4  | 1.21E+07 | 2.62E+06 | 9.57E+06 | 2.38E+06 | 1.57E+07 | 3.50E+06 | -0.337 | 4.83E-12 | 11.316 | 0.714  | 9.46E-33 | 32.024 |
| PC 38:5  | 8.91E+05 | 2.14E+05 | 8.46E+05 | 2.05E+05 | 4.86E+05 | 1.48E+05 | -0.075 | 1.20E-01 | 0.922  | -0.799 | 4.43E-35 | 34.354 |
| PC 38:6  | 1.18E+07 | 3.38E+06 | 1.20E+07 | 3.04E+06 | 9.43E+06 | 2.73E+06 | 0.023  | 6.70E-01 | 0.174  | -0.348 | 7.92E-11 | 10.101 |
| PC 38:7  | 1.41E+05 | 5.15E+04 | 1.65E+05 | 5.24E+04 | 4.74E+04 | 2.90E+04 | 0.227  | 8.81E-04 | 3.055  | -1.803 | 7.84E-52 | 51.106 |
| PC 39:3  | 3.37E+04 | 1.17E+04 | 3.03E+04 | 1.10E+04 | 3.12E+04 | 1.22E+05 | -0.154 | 2.90E-02 | 1.538  | 0.041  | 1.46E-01 | 0.836  |
| PC 39:4  | 9.13E+04 | 2.26E+04 | 7.48E+04 | 2.36E+04 | 8.30E+04 | 3.55E+04 | -0.288 | 4.64E-07 | 6.334  | 0.151  | 7.37E-02 | 1.132  |
| PC 39:5  | 3.76E+03 | 4.20E+03 | 3.90E+03 | 5.10E+03 | 2.50E+03 | 9.98E+03 | 0.054  | 8.22E-01 | 0.085  | -0.642 | 9.05E-01 | 0.043  |
| PC 39:6  | 2.06E+05 | 7.64E+04 | 1.49E+05 | 5.71E+04 | 1.11E+05 | 4.10E+04 | -0.469 | 3.25E-09 | 8.488  | -0.421 | 2.41E-07 | 6.618  |
| PC 39:7  | 2.12E+04 | 8.48E+03 | 1.81E+04 | 6.38E+03 | 1.34E+04 | 5.88E+04 | -0.228 | 2.93E-03 | 2.534  | -0.438 | 5.89E-01 | 0.230  |
| PC 40:0  | 3.98E+03 | 2.10E+03 | 4.83E+03 | 3.48E+03 | 2.70E+03 | 2.29E+06 | 0.281  | 3.15E-02 | 1.502  | -0.839 | 1.62E-01 | 0.790  |
| PC 40:1  | 1.20E+04 | 6.27E+03 | 1.32E+04 | 6.40E+03 | 7.86E+03 | 1.02E+04 | 0.139  | 1.67E-01 | 0.777  | -0.744 | 4.42E-04 | 3.355  |
| PC 40:2  | 3.82E+04 | 2.49E+04 | 4.37E+04 | 2.78E+04 | 2.05E+04 | 1.56E+04 | 0.193  | 1.32E-01 | 0.878  | -1.089 | 5.89E-12 | 11.230 |
| PC 40:3  | 6.18E+04 | 2.86E+04 | 6.68E+04 | 2.66E+04 | 4.92E+04 | 2.40E+05 | 0.112  | 1.89E-01 | 0.724  | -0.440 | 5.11E-01 | 0.292  |
| PC 40:4  | 1.49E+05 | 5.06E+04 | 1.46E+05 | 3.56E+04 | 1.26E+05 | 3.94E+04 | -0.032 | 5.90E-01 | 0.229  | -0.214 | 3.15E-05 | 4.502  |
| PC 40:5  | 2.61E+05 | 7.93E+04 | 2.57E+05 | 6.99E+04 | 2.07E+05 | 7.56E+04 | -0.023 | 6.88E-01 | 0.163  | -0.311 | 3.17E-07 | 6.498  |
| PC 40:6  | 2.67E+06 | 7.44E+05 | 2.39E+06 | 6.05E+05 | 2.86E+06 | 9.08E+05 | -0.160 | 3.02E-03 | 2.520  | 0.263  | 4.05E-05 | 4.392  |
| PC 40:7  | 9.51E+04 | 2.64E+04 | 8.81E+04 | 2.03E+04 | 4.43E+04 | 1.10E+04 | -0.112 | 2.98E-02 | 1.526  | -0.990 | 2.56E-49 | 48.592 |
| PC 40:8  | 2.32E+05 | 5.99E+04 | 2.05E+05 | 4.74E+04 | 1.38E+05 | 3.91E+04 | -0.179 | 3.22E-04 | 3.492  | -0.571 | 5.48E-23 | 22.261 |
| PC 40:9  | 1.44E+04 | 6.30E+03 | 1.38E+04 | 7.02E+03 | 7.63E+03 | 4.96E+03 | -0.067 | 4.39E-01 | 0.358  | -0.852 | 1.21E-13 | 12.917 |
| PC 40:10 | 3.06E+04 | 8.89E+03 | 2.50E+04 | 6.74E+03 | 1.70E+04 | 1.05E+05 | -0.291 | 1.97E-06 | 5.705  | -0.560 | 5.62E-01 | 0.250  |
| PC 41:5  | 1.19E+04 | 9.14E+03 | 1.15E+04 | 1.03E+04 | 8.14E+03 | 5.80E+03 | -0.038 | 8.19E-01 | 0.087  | -0.505 | 6.32E-03 | 2.200  |
| PC 41:6  | 1.87E+04 | 8.05E+03 | 1.55E+04 | 7.24E+03 | 1.48E+04 | 1.23E+05 | -0.266 | 3.08E-03 | 2.512  | -0.068 | 1.80E-01 | 0.744  |
| PC 42:1  | 1.29E+04 | 1.03E+04 | 1.51E+04 | 2.06E+04 | 7.33E+03 | 6.90E+03 | 0.225  | 3.30E-01 | 0.481  | -1.042 | 8.76E-04 | 3.058  |
| PC 42:2  | 1.81E+04 | 1.02E+04 | 1.71E+04 | 1.05E+04 | 8.63E+03 | 6.28E+03 | -0.078 | 5.02E-01 | 0.299  | -0.988 | 2.18E-10 | 9.661  |
| PC 42:3  | 1.85E+04 | 1.19E+04 | 1.93E+04 | 1.32E+04 | 1.40E+04 | 1.52E+04 | 0.059  | 6.52E-01 | 0.186  | -0.459 | 6.72E-02 | 1.173  |
| PC 42:4  | 1.47E+04 | 7.62E+03 | 1.73E+04 | 1.09E+04 | 1.54E+04 | 2.12E+05 | 0.241  | 4.11E-02 | 1.386  | -0.167 | 1.87E-01 | 0.727  |
| PC 42:5  | 4.65E+04 | 1.41E+04 | 6.18E+04 | 1.93E+04 | 3.65E+04 | 1.69E+05 | 0.409  | 3.65E-10 | 9.438  | -0.757 | 8.85E-01 | 0.053  |
| PC 42:6  | 5.08E+04 | 1.73E+04 | 5.40E+04 | 1.62E+04 | 3.19E+04 | 5.15E+05 | 0.088  | 1.66E-01 | 0.780  | -0.760 | 3.28E-01 | 0.484  |
| PC 42:7  | 4.94E+04 | 1.86E+04 | 4.44E+04 | 1.79E+04 | 2.36E+04 | 8.20E+03 | -0.154 | 4.78E-02 | 1.320  | -0.914 | 2.28E-22 | 21.642 |
| PC 42:8  | 2.81E+04 | 9.27E+03 | 2.19E+04 | 6.56E+03 | 3.00E+04 | 9.06E+04 | -0.360 | 5.62E-08 | 7.250  | 0.456  | 2.01E-02 | 1.698  |
| PC 42:9  | 2.99E+04 | 1.03E+04 | 3.26E+04 | 1.01E+04 | 2.55E+04 | 4.64E+04 | 0.122  | 6.10E-02 | 1.215  | -0.355 | 7.76E-01 | 0.110  |
| PC 42:10 | 5.13E+04 | 1.99E+04 | 7.00E+04 | 2.78E+04 | 3.24E+04 | 4.28E+04 | 0.448  | 5.59E-08 | 7.253  | -1.114 | 5.06E-10 | 9.296  |
| PC 42:11 | 1.11E+04 | 3.96E+03 | 8.85E+03 | 3.94E+03 | 1.02E+04 | 9.33E+06 | -0.320 | 7.05E-05 | 4.152  | 0.197  | 1.58E-01 | 0.801  |
| PC 44:2  | 3.07E+03 | 1.69E+03 | 3.58E+03 | 2.78E+03 | 1.87E+03 | 1.84E+04 | 0.222  | 1.07E-01 | 0.971  | -0.939 | 6.58E-01 | 0.182  |
| PC 44:3  | 1.62E+03 | 9.88E+02 | 1.69E+03 | 8.60E+02 | 1.64E+03 | 2.44E+05 | 0.057  | 6.10E-01 | 0.215  | -0.045 | 1.58E-01 | 0.802  |
| PC 44:4  | 1.50E+04 | 1.01E+04 | 1.44E+04 | 9.18E+03 | 1.71E+04 | 9.27E+03 | -0.062 | 6.34E-01 | 0.198  | 0.248  | 3.03E-02 | 1.519  |
| PC 44:5  | 9.51E+03 | 7.25E+03 | 8.86E+03 | 5.99E+03 | 9.57E+03 | 1.54E+04 | -0.103 | 4.73E-01 | 0.325  | 0.112  | 9.46E-02 | 1.024  |
| PC 44:6  | 4.52E+03 | 2.51E+03 | 4.30E+03 | 2.24E+03 | 7.34E+03 | 2.96E+03 | -0.071 | 5.07E-01 | 0.295  | 0.772  | 3.77E-16 | 15.424 |
| PC 46:4  | 1.87E+03 | 1.66E+03 | 1.65E+03 | 9.69E+02 | 2.60E+03 | 9.09E+04 | -0.179 | 2.44E-01 | 0.613  | 0.653  | 1.29E-01 | 0.890  |
| PC 46:5  | 1.16E+03 | 6.62E+02 | 1.22E+03 | 9.34E+02 | 1.52E+03 | 9.10E+04 | 0.071  | 5.97E-01 | 0.224  | 0.321  | 1.48E-01 | 0.830  |
| PE 30:0  | 1.03E+04 | 7.85E+03 | 1.53E+04 | 9.99E+03 | 3.56E+03 | 3.08E+03 | 0.571  | 7.44E-05 | 4.128  | -2.101 | 1.43E-23 | 22.846 |
| PE 32:0  | 2.08E+04 | 1.03E+04 | 2.95E+04 | 1.04E+04 | 2.20E+04 | 1.45E+04 | 0.502  | 5.00E-09 | 8.301  | -0.424 | 2.99E-05 | 4.524  |
| PE 32:1  | 6.62E+04 | 3.84E+04 | 1.81E+05 | 1.18E+05 | 5.31E+04 | 1.38E+05 | 1.446  | 5.98E-18 | 17.223 | -1.766 | 2.52E-   |        |

|            |          |          |          |          |          |          |        |          |        |        |          |        |
|------------|----------|----------|----------|----------|----------|----------|--------|----------|--------|--------|----------|--------|
| PE 36:3    | 1.35E+06 | 4.76E+05 | 2.35E+06 | 6.55E+05 | 2.91E+05 | 3.35E+05 | 0.798  | 1.05E-27 | 26.980 | -3.013 | 2.94E-75 | 74.532 |
| PE 36:4    | 1.65E+06 | 5.88E+05 | 2.99E+06 | 7.34E+05 | 8.58E+05 | 4.50E+05 | 0.862  | 3.04E-34 | 33.517 | -1.803 | 6.13E-67 | 66.212 |
| PE 36:5    | 3.39E+05 | 2.16E+05 | 7.35E+05 | 4.43E+05 | 7.97E+04 | 1.78E+05 | 1.114  | 1.57E-14 | 13.804 | -3.204 | 2.53E-32 | 31.598 |
| PE 36:6    | 1.06E+04 | 5.98E+03 | 2.35E+04 | 1.23E+04 | 2.89E+03 | 3.32E+03 | 1.142  | 1.50E-18 | 17.824 | -3.023 | 9.82E-40 | 39.008 |
| PE 37:2    | 2.31E+04 | 9.38E+03 | 3.48E+04 | 1.22E+04 | 8.15E+03 | 6.56E+03 | 0.592  | 2.32E-13 | 12.634 | -2.093 | 3.70E-50 | 49.432 |
| PE 37:3    | 3.04E+04 | 1.19E+04 | 4.11E+04 | 1.44E+04 | 1.24E+04 | 1.24E+05 | 0.435  | 1.42E-08 | 7.848  | -1.731 | 3.25E-01 | 0.489  |
| PE 37:4    | 1.01E+05 | 3.20E+04 | 1.51E+05 | 4.12E+04 | 4.13E+04 | 5.76E+04 | 0.587  | 1.87E-19 | 18.728 | -1.874 | 5.48E-35 | 34.262 |
| PE 37:5    | 6.38E+04 | 1.96E+04 | 6.41E+04 | 2.08E+04 | 4.55E+04 | 1.19E+05 | 0.007  | 9.13E-01 | 0.039  | -0.494 | 8.40E-01 | 0.075  |
| PE 37:6    | 7.32E+04 | 4.42E+04 | 1.54E+05 | 6.70E+04 | 1.65E+04 | 2.65E+05 | 1.076  | 1.10E-20 | 19.960 | -3.223 | 1.67E-04 | 3.778  |
| PE 38:1    | 3.46E+04 | 1.67E+04 | 4.47E+04 | 1.78E+04 | 1.49E+04 | 8.31E+03 | 0.370  | 2.92E-05 | 4.534  | -1.591 | 2.85E-37 | 36.545 |
| PE 38:2    | 8.85E+04 | 2.55E+04 | 1.20E+05 | 3.73E+04 | 3.39E+04 | 1.95E+04 | 0.439  | 1.17E-11 | 10.932 | -1.824 | 2.26E-53 | 52.645 |
| PE 38:3    | 4.86E+05 | 1.87E+05 | 7.88E+05 | 2.79E+05 | 2.52E+05 | 1.30E+05 | 0.697  | 2.39E-17 | 16.621 | -1.642 | 5.51E-45 | 44.259 |
| PE 38:4    | 5.19E+05 | 1.36E+05 | 9.21E+05 | 2.19E+05 | 2.70E+05 | 2.64E+05 | 0.826  | 2.37E-38 | 37.626 | -1.770 | 1.56E-46 | 45.808 |
| PE 38:5    | 2.48E+05 | 7.58E+04 | 4.42E+05 | 1.20E+05 | 1.19E+05 | 6.05E+04 | 0.834  | 4.69E-32 | 31.328 | -1.898 | 6.56E-65 | 64.183 |
| PE 38:6    | 3.24E+05 | 1.32E+05 | 6.11E+05 | 1.79E+05 | 2.33E+05 | 1.24E+05 | 0.916  | 1.15E-29 | 28.938 | -1.389 | 1.44E-44 | 43.841 |
| PE 38:7    | 6.38E+04 | 3.21E+04 | 1.50E+05 | 6.01E+04 | 2.32E+04 | 1.83E+04 | 1.232  | 9.52E-29 | 28.021 | -2.691 | 5.34E-53 | 52.272 |
| PE 39:6    | 7.47E+04 | 3.27E+04 | 1.02E+05 | 3.48E+04 | 2.46E+04 | 1.17E+04 | 0.444  | 2.48E-08 | 7.606  | -2.048 | 2.72E-55 | 54.565 |
| PE 40:2    | 6.70E+03 | 3.90E+03 | 6.84E+03 | 4.46E+03 | 5.84E+03 | 1.09E+04 | 0.029  | 8.12E-01 | 0.091  | -0.227 | 7.75E-01 | 0.111  |
| PE 40:4    | 1.05E+05 | 5.53E+04 | 1.61E+05 | 7.98E+04 | 7.32E+04 | 3.95E+04 | 0.611  | 1.60E-08 | 7.795  | -1.133 | 2.94E-20 | 19.532 |
| PE 40:5    | 3.99E+05 | 1.42E+05 | 7.35E+05 | 2.15E+05 | 1.81E+05 | 1.09E+05 | 0.881  | 5.03E-30 | 29.299 | -2.025 | 1.77E-61 | 60.752 |
| PE 40:6    | 1.31E+06 | 5.44E+05 | 2.26E+06 | 6.80E+05 | 5.70E+05 | 2.89E+05 | 0.785  | 3.64E-23 | 22.438 | -1.987 | 4.89E-61 | 60.310 |
| PE 40:7    | 3.89E+05 | 1.78E+05 | 7.11E+05 | 2.29E+05 | 1.19E+05 | 8.74E+04 | 0.868  | 1.08E-23 | 22.966 | -2.580 | 1.54E-64 | 63.812 |
| PE 40:8    | 8.89E+04 | 3.10E+04 | 1.41E+05 | 4.64E+04 | 5.32E+04 | 3.51E+05 | 0.663  | 3.02E-18 | 17.520 | -1.404 | 2.31E-01 | 0.637  |
| PE 42:10   | 5.86E+03 | 3.39E+03 | 7.82E+03 | 4.25E+03 | 1.05E+04 | 1.62E+04 | 0.418  | 2.52E-04 | 3.599  | 0.422  | 7.72E-03 | 2.112  |
| PL-PC 24:0 | 4.61E+03 | 1.96E+03 | 3.41E+03 | 2.83E+03 | 4.80E+03 | 5.29E+04 | -0.435 | 4.08E-04 | 3.389  | 0.493  | 9.24E-02 | 1.034  |
| PL-PC 26:0 | 2.59E+03 | 1.69E+03 | 2.19E+03 | 1.64E+03 | 3.58E+03 | 2.09E+03 | -0.241 | 8.25E-02 | 1.083  | 0.708  | 1.31E-08 | 7.884  |
| PL-PC 30:0 | 1.29E+04 | 5.65E+03 | 1.09E+04 | 5.67E+03 | 1.57E+04 | 2.15E+04 | -0.240 | 1.18E-02 | 1.930  | 0.526  | 7.53E-04 | 3.123  |
| PL-PC 32:0 | 9.44E+04 | 2.66E+04 | 1.03E+05 | 4.53E+04 | 1.06E+05 | 3.54E+04 | 0.127  | 9.04E-02 | 1.044  | 0.043  | 9.67E-01 | 0.014  |
| PL-PC 32:1 | 3.85E+04 | 2.76E+04 | 4.20E+04 | 2.76E+04 | 3.45E+04 | 2.49E+04 | 0.124  | 3.63E-01 | 0.440  | -0.284 | 6.74E-02 | 1.171  |
| PL-PC 34:0 | 5.59E+05 | 1.65E+05 | 6.26E+05 | 1.25E+05 | 3.24E+05 | 1.09E+05 | 0.163  | 9.99E-04 | 3.001  | -0.949 | 1.34E-47 | 46.874 |
| PL-PC 34:1 | 4.77E+05 | 1.39E+05 | 4.77E+05 | 1.65E+05 | 1.45E+05 | 8.19E+04 | 0.000  | 9.96E-01 | 0.002  | -1.714 | 2.21E-46 | 45.655 |
| PL-PC 34:2 | 1.00E+06 | 2.84E+05 | 8.45E+05 | 2.27E+05 | 1.79E+05 | 9.73E+04 | -0.247 | 1.33E-05 | 4.875  | -2.241 | 5.59E-73 | 72.252 |
| PL-PC 34:3 | 2.81E+04 | 1.03E+04 | 2.75E+04 | 9.83E+03 | 1.42E+04 | 5.46E+03 | -0.034 | 6.40E-01 | 0.194  | -0.954 | 1.07E-26 | 25.972 |
| PL-PC 34:4 | 3.13E+03 | 1.72E+03 | 3.67E+03 | 2.31E+03 | 1.27E+03 | 4.74E+03 | 0.228  | 5.72E-02 | 1.243  | -1.525 | 7.32E-04 | 3.136  |
| PL-PC 35:0 | 1.86E+04 | 4.99E+03 | 1.99E+04 | 5.59E+03 | 9.32E+03 | 1.91E+04 | 0.101  | 6.67E-02 | 1.176  | -1.095 | 2.67E-05 | 4.573  |
| PL-PC 35:1 | 1.06E+04 | 4.37E+03 | 1.32E+04 | 6.17E+03 | 4.90E+03 | 4.75E+03 | 0.324  | 3.55E-04 | 3.450  | -1.433 | 1.90E-20 | 19.722 |
| PL-PC 35:2 | 5.83E+04 | 2.22E+04 | 5.12E+04 | 1.99E+04 | 1.13E+04 | 7.25E+03 | -0.186 | 1.60E-02 | 1.796  | -2.176 | 5.40E-49 | 48.268 |
| PL-PC 35:3 | 1.65E+04 | 8.36E+03 | 1.26E+04 | 5.50E+03 | 1.08E+04 | 4.44E+03 | -0.395 | 6.39E-05 | 4.194  | -0.224 | 1.34E-02 | 1.872  |
| PL-PC 36:0 | 7.42E+04 | 2.12E+04 | 8.51E+04 | 2.25E+04 | 2.64E+04 | 1.73E+05 | 0.196  | 3.92E-04 | 3.406  | -1.686 | 4.11E-02 | 1.386  |
| PL-PC 36:1 | 3.02E+05 | 8.09E+04 | 3.14E+05 | 7.47E+04 | 8.28E+04 | 3.91E+04 | 0.060  | 2.36E-01 | 0.628  | -1.925 | 3.86E-74 | 73.413 |
| PL-PC 36:2 | 3.17E+05 | 1.07E+05 | 2.87E+05 | 1.01E+05 | 1.57E+05 | 8.64E+04 | -0.143 | 3.74E-02 | 1.427  | -0.866 | 4.89E-20 | 19.311 |
| PL-PC 36:3 | 1.68E+06 | 3.67E+05 | 1.45E+06 | 2.81E+05 | 1.26E+06 | 2.48E+05 | -0.211 | 7.83E-07 | 6.106  | -0.206 | 3.31E-08 | 7.481  |
| PL-PC 36:4 | 1.14E+06 | 3.13E+05 | 9.89E+05 | 2.07E+05 | 8.88E+05 | 2.18E+05 | -0.207 | 4.04E-05 | 4.394  | -0.155 | 1.34E-04 | 3.874  |
| PL-PC 36:5 | 6.84E+04 | 3.31E+04 | 6.57E+04 | 2.99E+04 | 4.48E+04 | 2.43E+04 | 0.508  | 5.36E-01 | 0.271  | -0.551 | 2.13E-08 | 7.672  |
| PL-PC 36:6 | 2.18E+04 | 7.49E+03 | 2.35E+04 | 6.92E+03 | 1.25E+04 | 4.40E+03 | 0.105  | 9.63E-02 | 1.016  | -0.911 | 5.70E-31 | 30.244 |
| PL-PC 37:1 | 1.36E+04 | 4.48E+03 | 1.53E+04 | 4.88E+03 | 8.32E+03 | 3.89E+03 | 0.164  | 1.13E-02 | 1.948  | -0.877 | 1.51E-23 | 22.821 |
| PL-PC 37:2 | 1.06E+04 | 4.08E+03 | 1.12E+04 | 4.32E+03 | 4.75E+03 | 2.73E+03 | 0.079  | 3.04E-01 | 0.517  | -1.232 | 1.05E-28 | 27.978 |
| PL-PC 37:3 | 1.35E+04 | 5.41E+03 | 1.46E+04 | 4.60E+03 | 9.86E+03 | 5.51E+03 | 0.106  | 1.37E-01 | 0.864  | -0.564 | 9.02E-11 | 10.045 |
| PL-PC 37:4 | 8.98E+04 | 3.32E+04 | 7.11E+04 | 2.17E+04 | 4.50E+04 | 3.23E+04 | -0.337 | 2.30E-06 | 5.638  | -0.660 | 1.24E-08 | 7.906  |
| PL-PC 37:6 | 1.66E+05 | 6.23E+04 | 2.05E+05 | 6.36E+04 | 6.56E+04 | 3.79E+05 | 0.305  | 1.07E-05 | 4.972  | -1.641 | 2.05E-02 | 1.689  |
| PL-PC 38:3 | 9.36E+05 | 2.01E+05 | 8.78E+05 | 2.49E+05 | 6.88E+05 | 5.15E+05 | -0.091 | 6.66E-02 | 1.177  | -0.352 | 4.21E-04 | 3.376  |
| PL-PC 38:4 | 9.85E+05 | 2.66E+05 | 8.94E+05 | 2.78E+05 | 5.73E+05 | 1.50E+05 | -0.141 | 1.50E-02 | 1.824  | -0.642 | 2.05E-21 | 20.688 |
| PL-PC 38:5 | 9.67E+04 | 2.50E+04 | 9.21E+04 | 2.31E+04 | 5.46E+04 | 1.37E+04 | -0.069 | 1.74E-01 | 0.760  | -0.755 | 1.46E-33 | 32.837 |
| PL-PC 38:6 | 1.66E+05 | 6.20E+04 | 1.57E+05 | 5.12E+04 | 1.60E+05 | 4.18E+04 | -0.078 | 2.67E-01 | 0.574  | 0.026  | 9.39E-01 | 0.028  |
| PL-PC 39:5 | 3.04E+04 | 1.28E+04 | 2.78E+04 | 1.32E+04 | 2.11E+04 | 2.99E+05 | -0.128 | 1.50E-01 | 0.823  | -0.400 | 2.35E-01 | 0.630  |
| PL-PC 40:0 | 5.27E+04 | 3.08E+04 | 6.05E+04 | 3.15E+04 | 2.65E+04 | 2.02E+04 | 0.199  | 6.93E-02 | 1.159  | -1.239 | 1.35E-18 | 17.868 |
| PL-PC 40:1 | 8.58E+03 | 4.71E+03 | 9.10E+03 | 3.82E+03 | 4.63E+03 | 2.74E+03 | 0.085  | 3.78E-01 | 0.422  | -0.974 | 3.81E-19 | 18.419 |
| PL-PC 40:2 | 1.99E+04 | 5.70E+03 | 2.16E+04 | 5.70E+03 | 9.83E+03 | 1.83E+04 | 0.117  | 3.20E-02 | 1.494  | -1.137 | 4.56E-07 | 6.341  |
| PL-PC 40:3 | 5.85E+04 | 2.34E+04 | 6.17E+04 | 2.61E+04 | 2.73E+04 | 9.53E+03 | 0.077  | 3.49E-01 | 0.458  | -1.176 | 3.37E-28 | 27.473 |
| PL-PC 40:4 | 3.11E+05 | 1.09E+05 | 3.39E+05 | 9.67E+04 | 1.58E+05 | 5.37E+04 | 0.124  | 5.05E-02 | 1.297  | -1.098 | 2.58E-40 | 39.589 |
| PL-PC 40:5 | 2.35E+05 | 6.80E+04 | 2.72E+05 | 8.40E+04 | 1.68E+05 | 4.55E+04 | 0.214  | 4.45E-04 | 3.351  | -0.699 | 2.32E-23 | 22.635 |
| PL-PC 40:6 | 1.98E+05 | 6.30E+04 | 2.00E+05 | 6.24E+04 | 1.05E+05 | 3.20E+04 | 0.011  | 8.66E-01 | 0.062  | -0.930 | 2.05E-32 | 31.687 |
| PL-PC 41:4 | 2.70E+04 | 1.99E+04 | 3.89E+04 | 2.04E+04 | 2.52E+04 | 2.70E+05 | 0.528  | 2.53E-05 | 4.597  | -0.626 | 3.77E-01 | 0.424  |
| PL-PC 42:0 | 2.55E+04 | 1.55E+04 | 2.69E+04 | 2.25E+04 | 1.20E+04 | 9.58E+03 | 0.081  | 5.79E-01 | 0.237  | -1.169 | 1.29E-09 | 8.891  |
| PL-PC 42:1 | 2.67E+04 | 1.36E+04 | 2.45E+04 | 1.55E+04 | 1.34E+04 | 1.40E+04 | -0.122 | 2.80E-01 | 0.553  | -0.870 | 9.37E-07 | 6.028  |
| PL-PC 42:2 | 1.52E+05 | 1.07E+05 | 1.67E+05 | 1.15E+05 | 7.54E+04 | 6.54E+04 | 0.138  | 3.16E-01 | 0.500  | -1.149 | 1.19E-11 | 10.924 |
| PL-PC 42:3 | 6.60E+04 | 2.58E+04 | 6.71E+04 | 2.47E+04 | 3.21E+04 | 3.59E+04 | 0.023  | 7.61E-01 | 0.119  | -1.062 | 2.30E-12 | 11.638 |
| PL-PC 42:4 | 2.80E+05 | 1.74E+05 | 3.47E+05 | 1.96E+05 | 1.45E+05 | 1.01E+05 | 0.311  | 8.83E-03 | 2.054  | -1.259 | 1.51E-17 | 16.821 |
| PL-PC 42:5 | 1.40E+05 | 5.04E+04 | 1.30E+05 | 4.43E+04 | 5.56E+04 | 2.46E+04 | -0.113 | 1.06E-01 | 0.974  | -1.223 | 9.34E-36 | 35.030 |
| PL-PC 43:3 | 1.08E+04 | 6.39E+03 | 1.11E+04 | 5.70E+03 | 5.29E+03 | 8.46E+06 | 0.043  | 6.94E-01 | 0.159  | -1.071 | 1.61E-01 | 0.794  |
| PL-PC 43:4 | 1.10E+04 | 4.90E+03 | 1.01E+04 | 5.17E+03 | 7.55E+03 | 4.04E+03 | -0.116 | 2.22E-01 | 0.654  | -0.422 | 3.40E-04 | 3.468  |
| PL-PC 44:1 | 9.38E+03 | 8.70E+03 | 8.72E+03 | 1.05E+04 | 2.90E+03 | 2.72E+03 | -0.105 | 6.19E-01 | 0.209  | -1.587 | 2.14E-07 | 6.669  |
| PL-PC 44:2 | 4.36E+04 | 2.28E+04 | 4.52E+04 | 2.66E+04 | 1.94E+04 | 1.49E+04 | 0.053  | 6.35E-01 | 0.197  | -1.223 | 4.10E-16 | 15.387 |
| PL-PC 44:3 | 9.00E+04 | 4.30E+04 | 8.82E+04 | 5.36E+04 | 4.34E+04 | 2.76E+04 | -0.029 | 7.92E-01 | 0.101  | -1.024 | 3.79E-13 | 12.421 |
| PL-PC 44:4 | 3.09E+05 | 1.53E+05 | 3.20E+05 | 1.40E+05 | 1.59E+05 | 8.36E+04 | 0.053  | 5.65E-01 | 0.248  | -1.014 | 1.15E-20 | 19.940 |
| PL-PC 44:5 | 2.73E+05 | 8.85E+04 | 2.54E+05 | 8.36E+04 | 1.22E+05 | 5.60E+04 | -0.104 | 1.11E-01 | 0.956  | -1.062 | 1.79E-31 | 30.746 |
| PL-PC 44:6 | 1        |          |          |          |          |          |        |          |        |        |          |        |

|            |          |          |          |          |          |          |        |          |        |        |          |        |
|------------|----------|----------|----------|----------|----------|----------|--------|----------|--------|--------|----------|--------|
| PL-PE 37:2 | 1.57E+04 | 6.27E+03 | 1.87E+04 | 6.50E+03 | 3.60E+03 | 6.90E+03 | 0.250  | 8.51E-04 | 3.070  | -2.374 | 2.83E-36 | 35.548 |
| PL-PE 37:4 | 1.99E+05 | 8.29E+04 | 1.38E+05 | 4.80E+04 | 6.28E+04 | 2.74E+04 | -0.528 | 4.53E-10 | 9.344  | -1.135 | 1.18E-30 | 29.927 |
| PL-PE 37:5 | 4.19E+04 | 2.41E+04 | 3.82E+04 | 2.28E+04 | 1.36E+04 | 7.89E+03 | -0.133 | 2.53E-01 | 0.596  | -1.495 | 2.15E-20 | 19.668 |
| PL-PE 37:6 | 2.38E+04 | 1.08E+04 | 2.97E+04 | 1.90E+04 | 9.74E+03 | 1.34E+04 | 0.321  | 5.77E-03 | 2.239  | -1.608 | 3.75E-14 | 13.426 |
| PL-PE 38:1 | 4.17E+04 | 3.79E+04 | 5.05E+04 | 3.98E+04 | 1.16E+04 | 7.03E+03 | 0.275  | 1.03E-01 | 0.988  | -2.120 | 3.07E-19 | 18.512 |
| PL-PE 38:2 | 1.15E+05 | 3.74E+04 | 1.39E+05 | 4.80E+04 | 2.78E+04 | 2.18E+04 | 0.275  | 6.35E-05 | 4.197  | -2.318 | 1.03E-55 | 54.986 |
| PL-PE 38:3 | 5.14E+05 | 1.60E+05 | 5.33E+05 | 1.52E+05 | 1.67E+05 | 8.21E+04 | 0.050  | 3.96E-01 | 0.402  | -1.677 | 1.47E-55 | 54.833 |
| PL-PE 38:4 | 4.85E+05 | 1.83E+05 | 4.49E+05 | 1.39E+05 | 1.87E+05 | 9.04E+04 | -0.112 | 1.07E-01 | 0.969  | -1.265 | 1.92E-39 | 38.717 |
| PL-PE 38:5 | 2.66E+06 | 6.87E+05 | 2.34E+06 | 5.17E+05 | 8.07E+05 | 3.15E+05 | -0.187 | 1.50E-04 | 3.825  | -1.534 | 2.65E-68 | 67.577 |
| PL-PE 38:6 | 1.65E+06 | 4.85E+05 | 1.87E+06 | 4.78E+05 | 8.38E+05 | 2.98E+05 | 0.178  | 1.24E-03 | 2.906  | -1.155 | 9.01E-48 | 47.046 |
| PL-PE 39:4 | 5.15E+04 | 1.92E+04 | 4.49E+04 | 1.50E+04 | 2.64E+04 | 2.98E+04 | -0.196 | 6.16E-03 | 2.211  | -0.765 | 1.10E-05 | 4.959  |
| PL-PE 39:6 | 1.09E+05 | 3.72E+04 | 1.14E+05 | 3.42E+04 | 4.72E+04 | 1.86E+04 | 0.070  | 2.73E-01 | 0.564  | -1.276 | 6.74E-44 | 43.171 |
| PL-PE 40:1 | 1.61E+04 | 7.83E+03 | 1.85E+04 | 8.95E+03 | 5.86E+03 | 3.99E+03 | 0.202  | 3.73E-02 | 1.429  | -1.663 | 3.87E-30 | 29.413 |
| PL-PE 40:2 | 3.82E+04 | 1.35E+04 | 4.55E+04 | 1.67E+04 | 4.12E+04 | 3.75E+04 | 0.251  | 5.88E-04 | 3.230  | -1.683 | 2.72E-10 | 9.566  |
| PL-PE 40:3 | 1.26E+05 | 4.37E+04 | 1.25E+05 | 3.12E+04 | 8.61E+04 | 2.64E+05 | -0.010 | 8.67E-01 | 0.062  | -0.538 | 6.99E-01 | 0.155  |
| PL-PE 40:4 | 3.87E+05 | 1.12E+05 | 3.88E+05 | 1.02E+05 | 2.58E+05 | 1.42E+05 | 0.000  | 9.94E-01 | 0.003  | -0.584 | 3.07E-13 | 12.512 |
| PL-PE 40:5 | 5.01E+05 | 1.45E+05 | 5.05E+05 | 1.26E+05 | 1.92E+05 | 1.95E+05 | 0.132  | 1.03E-02 | 1.986  | -1.518 | 1.28E-34 | 33.891 |
| PL-PE 40:6 | 1.66E+05 | 6.23E+04 | 2.05E+05 | 6.36E+04 | 6.56E+04 | 2.55E+04 | 0.305  | 1.07E-05 | 4.972  | -1.641 | 1.40E-53 | 52.854 |
| PL-PE 42:4 | 7.49E+04 | 3.02E+04 | 7.04E+04 | 2.35E+04 | 5.05E+04 | 1.32E+05 | -0.090 | 2.22E-01 | 0.654  | -0.478 | 6.89E-01 | 0.162  |
| PL-PE 42:6 | 1.05E+05 | 4.11E+04 | 1.36E+05 | 4.77E+04 | 4.44E+04 | 1.87E+04 | 0.372  | 1.03E-06 | 5.988  | -1.609 | 7.41E-46 | 45.130 |
| PG 32:0    | 8.05E+03 | 4.14E+03 | 9.91E+03 | 6.93E+03 | 6.54E+03 | 4.48E+03 | 0.300  | 1.84E-02 | 1.736  | -0.601 | 1.89E-04 | 3.724  |
| PG 32:1    | 3.55E+03 | 1.85E+03 | 4.70E+03 | 2.51E+03 | 2.19E+03 | 7.65E+03 | 0.402  | 2.17E-04 | 3.664  | -1.100 | 6.01E-02 | 1.221  |
| PG 33:0    | 3.48E+04 | 1.21E+04 | 3.05E+04 | 1.13E+04 | 3.00E+04 | 2.30E+05 | -0.193 | 7.30E-03 | 2.136  | -0.025 | 2.48E-01 | 0.606  |
| PG 34:0    | 4.72E+06 | 7.29E+05 | 3.87E+06 | 1.77E+05 | 4.98E+06 | 1.08E+06 | -0.285 | 2.70E-14 | 13.568 | 0.364  | 1.41E-13 | 12.852 |
| PG 34:1    | 4.93E+04 | 1.49E+04 | 8.81E+04 | 2.89E+04 | 1.71E+04 | 1.41E+04 | 0.839  | 1.50E-26 | 25.823 | -2.369 | 4.13E-59 | 58.384 |
| PG 34:2    | 1.56E+04 | 5.81E+03 | 2.08E+04 | 7.34E+03 | 4.59E+03 | 5.74E+03 | 0.410  | 5.18E-08 | 7.286  | -2.179 | 1.67E-42 | 41.778 |
| PG 36:0    | 7.34E+04 | 2.86E+04 | 5.97E+04 | 1.23E+04 | 1.18E+05 | 4.67E+04 | -0.298 | 9.76E-06 | 5.011  | 0.982  | 8.79E-27 | 26.056 |
| PG 36:2    | 9.73E+04 | 3.14E+04 | 1.46E+05 | 5.07E+04 | 3.45E+04 | 2.31E+04 | 0.588  | 4.57E-15 | 14.340 | -2.083 | 2.24E-52 | 51.650 |
| PI 34:1    | 7.04E+04 | 3.45E+04 | 1.23E+05 | 4.98E+04 | 2.20E+04 | 4.14E+04 | 0.800  | 3.41E-16 | 15.467 | -2.481 | 2.64E-36 | 35.579 |
| PI 34:2    | 7.86E+04 | 4.24E+04 | 1.19E+05 | 4.30E+04 | 1.88E+04 | 1.52E+04 | 0.599  | 5.95E-11 | 10.226 | -2.665 | 1.32E-58 | 57.881 |
| PI 34:3    | 7.01E+04 | 3.39E+04 | 9.89E+04 | 4.84E+04 | 1.62E+04 | 1.72E+04 | 0.497  | 1.07E-06 | 5.970  | -2.610 | 5.25E-40 | 39.280 |
| PI 36:2    | 3.69E+05 | 1.85E+05 | 5.12E+05 | 1.70E+05 | 4.43E+04 | 1.27E+05 | 0.475  | 1.46E-08 | 7.836  | -3.531 | 5.50E-57 | 56.260 |
| PI 36:3    | 8.82E+04 | 5.07E+04 | 1.05E+05 | 3.70E+04 | 3.51E+04 | 1.56E+04 | 0.247  | 7.37E-03 | 2.132  | -1.578 | 1.52E-44 | 43.819 |
| PI 36:4    | 8.89E+04 | 4.16E+04 | 1.00E+05 | 3.94E+04 | 7.91E+04 | 3.14E+04 | 0.170  | 4.76E-02 | 1.322  | -0.339 | 6.81E-06 | 5.167  |
| PI 38:3    | 7.72E+05 | 4.67E+05 | 8.35E+05 | 3.38E+05 | 3.76E+05 | 1.72E+05 | 0.114  | 2.58E-01 | 0.588  | -1.153 | 3.39E-28 | 27.470 |
| PI 38:4    | 1.10E+06 | 4.29E+05 | 1.06E+06 | 3.54E+05 | 3.19E+05 | 2.39E+05 | -0.050 | 4.87E-01 | 0.312  | -0.780 | 1.32E-22 | 21.879 |
| PI 38:5    | 8.44E+04 | 3.71E+04 | 8.16E+04 | 2.97E+04 | 4.61E+04 | 2.50E+04 | -0.048 | 5.49E-01 | 0.260  | -0.823 | 1.71E-16 | 15.768 |
| PI 38:6    | 2.00E+04 | 1.08E+04 | 2.27E+04 | 1.14E+04 | 1.33E+04 | 2.05E+04 | 0.182  | 7.72E-02 | 1.112  | -0.772 | 2.19E-03 | 2.659  |
| PI 40:5    | 9.35E+04 | 3.82E+04 | 1.07E+05 | 3.85E+04 | 6.11E+04 | 3.24E+04 | 0.192  | 1.24E-02 | 1.907  | -0.807 | 8.69E-17 | 16.061 |
| PI 40:6    | 7.18E+04 | 3.38E+04 | 9.38E+04 | 3.76E+04 | 3.45E+04 | 1.41E+04 | 0.386  | 1.18E-05 | 4.929  | -1.443 | 2.76E-36 | 35.559 |
| PS 36:1    | 8.23E+04 | 3.73E+04 | 1.66E+05 | 6.08E+04 | 4.04E+04 | 3.04E+04 | 1.015  | 5.50E-26 | 25.260 | -2.042 | 4.72E-48 | 47.326 |
| PS 38:4    | 1.35E+04 | 1.94E+04 | 1.60E+04 | 9.77E+03 | 3.21E+04 | 1.08E+06 | 0.249  | 2.30E-01 | 0.638  | 1.000  | 2.15E-01 | 0.667  |
| SM 29:1    | 2.44E+03 | 1.13E+03 | 2.18E+03 | 8.45E+02 | 9.17E+02 | 7.86E+03 | -0.160 | 6.38E-02 | 1.196  | -1.251 | 8.11E-01 | 0.091  |
| SM 30:0    | 6.26E+03 | 3.19E+03 | 7.00E+03 | 3.28E+03 | 4.33E+03 | 5.53E+03 | 0.161  | 9.71E-02 | 1.013  | -0.693 | 1.75E-03 | 2.756  |
| SM 30:1    | 6.19E+04 | 2.08E+04 | 6.85E+04 | 2.25E+04 | 1.73E+04 | 9.99E+03 | 0.145  | 2.87E-02 | 1.542  | -1.982 | 3.35E-54 | 53.475 |
| SM 30:2    | 7.68E+03 | 3.47E+03 | 7.05E+03 | 2.52E+03 | 3.39E+03 | 1.80E+03 | -0.125 | 1.28E-01 | 0.892  | -1.055 | 7.05E-25 | 24.152 |
| SM 31:1    | 3.97E+04 | 1.42E+04 | 4.17E+04 | 1.49E+04 | 1.04E+04 | 5.88E+03 | 0.070  | 3.21E-01 | 0.494  | -1.998 | 2.48E-50 | 49.605 |
| SM 32:0    | 7.04E+04 | 2.50E+04 | 9.13E+04 | 3.70E+04 | 5.61E+04 | 3.94E+04 | 0.375  | 2.77E-06 | 5.558  | -0.702 | 5.43E-09 | 8.265  |
| SM 32:1    | 1.35E+06 | 3.67E+05 | 1.73E+06 | 4.72E+05 | 4.26E+05 | 2.09E+05 | 0.354  | 6.63E-10 | 9.179  | -2.022 | 3.89E-68 | 67.410 |
| SM 32:2    | 1.62E+05 | 4.44E+04 | 1.78E+05 | 4.71E+04 | 7.44E+04 | 1.94E+05 | 0.135  | 1.23E-02 | 1.909  | -1.257 | 3.32E-05 | 4.479  |
| SM 33:0    | 6.21E+04 | 1.79E+04 | 7.74E+04 | 2.32E+04 | 2.00E+04 | 5.03E+04 | 0.318  | 1.90E-07 | 6.721  | -1.954 | 2.60E-18 | 17.584 |
| SM 33:1    | 4.68E+05 | 1.39E+05 | 5.44E+05 | 1.84E+05 | 1.81E+05 | 7.03E+04 | 0.218  | 8.01E-04 | 3.096  | -1.590 | 5.46E-48 | 47.263 |
| SM 33:2    | 2.74E+04 | 8.41E+03 | 3.18E+04 | 1.01E+04 | 9.84E+03 | 4.65E+03 | 0.212  | 8.14E-04 | 3.089  | -1.691 | 1.80E-50 | 49.745 |
| SM 34:0    | 2.63E+05 | 8.26E+04 | 3.45E+05 | 1.04E+05 | 2.26E+05 | 1.02E+05 | 0.393  | 1.26E-09 | 8.898  | -0.607 | 2.20E-15 | 14.658 |
| SM 34:1    | 2.70E+06 | 4.07E+05 | 3.41E+06 | 7.58E+05 | 1.64E+06 | 4.62E+05 | 0.339  | 2.38E-15 | 14.624 | -1.061 | 1.74E-53 | 52.759 |
| SM 34:2    | 2.01E+06 | 4.27E+05 | 2.67E+06 | 5.44E+05 | 1.20E+06 | 3.82E+05 | 0.409  | 6.06E-19 | 18.217 | -1.148 | 1.60E-59 | 58.796 |
| SM 34:3    | 1.41E+04 | 5.00E+03 | 1.77E+04 | 5.72E+03 | 6.24E+03 | 6.23E+04 | 0.323  | 2.96E-06 | 5.529  | -1.502 | 5.53E-01 | 0.257  |
| SM 35:1    | 1.39E+06 | 2.22E+05 | 1.07E+06 | 2.12E+05 | 2.33E+06 | 5.32E+05 | -0.376 | 1.28E-21 | 20.894 | 1.119  | 2.05E-56 | 55.689 |
| SM 35:2    | 3.30E+04 | 1.23E+04 | 3.56E+04 | 1.56E+04 | 1.72E+04 | 3.24E+04 | 0.109  | 1.82E-01 | 0.741  | -1.049 | 2.30E-05 | 4.639  |
| SM 35:6    | 4.31E+03 | 2.74E+03 | 5.58E+03 | 3.29E+03 | 2.99E+03 | 2.63E+03 | 0.372  | 2.59E-03 | 2.586  | -0.902 | 6.81E-08 | 7.167  |
| SM 36:0    | 5.74E+04 | 1.85E+04 | 8.36E+04 | 3.20E+04 | 1.32E+05 | 5.41E+04 | 0.542  | 6.36E-17 | 16.196 | 0.665  | 1.86E-14 | 13.729 |
| SM 36:1    | 2.20E+06 | 4.68E+05 | 2.75E+06 | 5.96E+05 | 2.37E+06 | 5.25E+05 | 0.327  | 9.74E-13 | 12.011 | -0.220 | 4.93E-08 | 7.308  |
| SM 36:2    | 1.20E+06 | 3.09E+05 | 1.48E+06 | 4.16E+05 | 1.70E+06 | 4.72E+05 | 0.303  | 7.36E-08 | 7.133  | 0.204  | 2.42E-03 | 2.617  |
| SM 36:3    | 1.58E+05 | 4.76E+04 | 2.01E+05 | 6.01E+04 | 5.46E+04 | 3.37E+04 | 0.342  | 4.33E-08 | 7.364  | -1.877 | 5.15E-55 | 54.288 |
| SM 36:4    | 3.16E+04 | 7.64E+03 | 3.48E+04 | 8.72E+03 | 1.81E+04 | 6.04E+03 | 0.138  | 5.25E-03 | 2.280  | -0.943 | 4.16E-40 | 39.381 |
| SM 37:1    | 1.65E+05 | 7.19E+04 | 1.84E+05 | 8.26E+04 | 1.12E+05 | 4.65E+04 | 0.158  | 7.36E-02 | 1.133  | -0.711 | 3.10E-13 | 12.509 |
| SM 37:2    | 5.11E+04 | 1.56E+04 | 4.73E+04 | 1.49E+04 | 4.27E+04 | 1.33E+04 | -0.110 | 7.51E-02 | 1.124  | -0.150 | 9.15E-03 | 2.039  |
| SM 38:0    | 1.63E+05 | 3.76E+04 | 2.16E+05 | 4.94E+04 | 2.97E+05 | 9.73E+04 | 0.403  | 8.36E-16 | 15.078 | 0.460  | 8.66E-12 | 11.063 |
| SM 38:1    | 2.46E+05 | 1.09E+05 | 3.24E+05 | 1.48E+05 | 2.59E+05 | 1.25E+05 | 0.401  | 1.67E-05 | 4.778  | -0.323 | 7.71E-04 | 3.113  |
| SM 38:2    | 5.86E+05 | 1.22E+05 | 5.99E+05 | 1.54E+05 | 8.04E+05 | 1.92E+05 | 0.030  | 5.25E-01 | 0.280  | 0.425  | 1.19E-13 | 12.924 |
| SM 38:3    | 5.11E+04 | 1.90E+04 | 5.13E+04 | 1.73E+04 | 4.78E+04 | 1.27E+06 | 0.005  | 9.42E-01 | 0.026  | -0.102 | 2.69E-01 | 0.570  |
| SM 38:4    | 2.02E+04 | 8.26E+03 | 2.53E+04 | 8.87E+03 | 1.54E+04 | 7.30E+03 | 0.326  | 2.19E-05 | 4.659  | -0.712 | 1.35E-14 | 13.869 |
| SM 38:5    | 1.56E+04 | 6.44E+03 | 1.63E+04 | 7.30E+03 | 2.72E+04 | 1.52E+04 | 0.068  | 4.29E-01 | 0.368  | 0.734  | 5.47E-12 | 11.262 |
| SM 39:1    | 2.20E+05 | 6.58E+04 | 2.53E+05 | 7.11E+04 | 1.25E+05 | 1.48E+05 | 0.200  | 6.08E-04 | 3.216  | -1.016 | 6.84E-12 | 11.165 |
| SM 39:2    | 1.34E+05 | 3.08E+04 | 1.40E+05 | 3.29E+04 | 6.65E+04 | 2.16E+04 | 0.068  | 1.44E-01 | 0.842  | -1.075 | 2.53E-49 | 48.597 |
| SM 39:3    | 5.32E+04 | 1.30E+04 | 4.76E+04 | 1.35E+04 | 4.02E+04 | 1.15E+04 | -0.160 | 2.48E-03 | 2.605  | -0.244 | 8.24E-06 | 5.084  |
| SM 40:0    | 2.53E+05 | 6.68E+04 | 3.10E+05 | 6.20E+04 | 3.14E+05 | 7        |        |          |        |        |          |        |

|         |          |          |          |          |          |          |        |          |        |        |          |        |
|---------|----------|----------|----------|----------|----------|----------|--------|----------|--------|--------|----------|--------|
| SM 43:2 | 1.82E+05 | 5.42E+04 | 1.69E+05 | 5.61E+04 | 1.04E+05 | 3.28E+04 | -0.105 | 9.43E-02 | 1.026  | -0.697 | 9.56E-21 | 20.020 |
| SM 43:3 | 6.38E+04 | 1.73E+04 | 5.97E+04 | 2.13E+04 | 5.39E+04 | 1.65E+04 | -0.095 | 1.29E-01 | 0.888  | -0.149 | 1.73E-02 | 1.761  |
| SM 43:4 | 1.42E+04 | 9.96E+03 | 1.40E+04 | 1.05E+04 | 1.87E+04 | 2.20E+04 | -0.024 | 8.67E-01 | 0.062  | 0.414  | 5.59E-02 | 1.252  |
| SM 43:7 | 1.04E+04 | 4.09E+03 | 1.18E+04 | 5.21E+03 | 7.37E+03 | 4.16E+03 | 0.174  | 3.83E-02 | 1.417  | -0.677 | 2.14E-10 | 9.669  |
| SM 44:1 | 1.36E+04 | 6.16E+03 | 1.32E+04 | 4.71E+03 | 1.91E+04 | 3.33E+05 | -0.034 | 6.78E-01 | 0.169  | 0.530  | 1.10E-01 | 0.959  |
| SM 44:2 | 9.18E+03 | 4.58E+03 | 9.90E+03 | 5.42E+03 | 1.20E+04 | 8.47E+03 | 0.110  | 2.95E-01 | 0.531  | 0.280  | 4.68E-03 | 2.330  |
| SM 44:3 | 4.04E+04 | 1.98E+04 | 3.73E+04 | 2.23E+04 | 5.14E+04 | 2.55E+04 | -0.116 | 2.80E-01 | 0.553  | 0.463  | 4.06E-05 | 4.391  |
| SM 44:4 | 1.96E+04 | 9.00E+03 | 1.85E+04 | 9.77E+03 | 4.40E+04 | 3.05E+04 | -0.082 | 4.03E-01 | 0.394  | 1.253  | 1.66E-17 | 16.780 |
| SM 44:5 | 1.97E+04 | 7.85E+03 | 2.90E+04 | 1.83E+04 | 4.46E+04 | 1.73E+04 | 0.558  | 2.86E-06 | 5.544  | 0.623  | 5.32E-11 | 10.274 |
| SM 44:6 | 1.23E+04 | 6.37E+03 | 2.10E+04 | 1.40E+04 | 2.69E+04 | 1.18E+05 | 0.775  | 1.79E-08 | 7.748  | 0.358  | 6.13E-02 | 1.213  |
| SM 44:7 | 6.45E+03 | 4.04E+03 | 7.69E+03 | 4.55E+03 | 1.14E+04 | 5.57E+03 | 0.254  | 3.69E-02 | 1.432  | 0.566  | 1.49E-06 | 5.828  |
| SM 45:4 | 1.35E+04 | 7.58E+03 | 1.38E+04 | 8.08E+03 | 7.03E+03 | 1.72E+04 | 0.031  | 7.86E-01 | 0.105  | -0.976 | 1.34E-02 | 1.872  |
| SM 47:5 | 1.15E+04 | 7.91E+03 | 1.38E+04 | 2.00E+04 | 6.52E+03 | 6.24E+04 | 0.260  | 2.78E-01 | 0.556  | -1.076 | 9.68E-01 | 0.014  |
| TG 36:0 | 7.49E+04 | 2.07E+05 | 4.95E+04 | 9.20E+04 | 1.63E+04 | 3.06E+04 | -0.598 | 2.48E-01 | 0.605  | -1.601 | 5.05E-04 | 3.297  |
| TG 38:0 | 1.43E+05 | 3.36E+05 | 7.93E+04 | 1.68E+05 | 1.82E+04 | 3.42E+04 | -0.854 | 8.06E-02 | 1.094  | -2.124 | 4.50E-04 | 3.347  |
| TG 39:0 | 2.15E+04 | 2.68E+04 | 1.44E+04 | 1.26E+04 | 5.23E+03 | 2.93E+04 | -0.575 | 1.49E-02 | 1.827  | -1.465 | 4.93E-02 | 1.307  |
| TG 40:0 | 2.49E+05 | 4.71E+05 | 1.41E+05 | 2.69E+05 | 1.41E+04 | 2.88E+04 | -0.822 | 4.13E-02 | 1.384  | -3.320 | 3.72E-06 | 5.429  |
| TG 40:1 | 1.11E+05 | 1.69E+05 | 1.02E+05 | 1.29E+05 | 8.62E+03 | 2.23E+04 | -0.123 | 6.62E-01 | 0.179  | -3.558 | 6.00E-12 | 11.222 |
| TG 41:0 | 3.41E+04 | 4.68E+04 | 2.18E+04 | 2.02E+04 | 4.83E+03 | 2.85E+05 | -0.641 | 1.45E-02 | 1.840  | -2.177 | 5.58E-01 | 0.253  |
| TG 42:0 | 3.59E+05 | 5.33E+05 | 2.47E+05 | 3.28E+05 | 1.80E+04 | 4.04E+04 | -0.542 | 6.59E-02 | 1.181  | -3.775 | 1.73E-11 | 10.763 |
| TG 42:1 | 3.00E+05 | 4.12E+05 | 2.55E+05 | 3.66E+05 | 1.55E+04 | 5.47E+04 | -0.237 | 3.98E-01 | 0.401  | -4.035 | 5.71E-10 | 9.244  |
| TG 42:2 | 1.60E+05 | 1.94E+05 | 1.63E+05 | 2.08E+05 | 1.02E+04 | 6.01E+05 | 0.027  | 9.15E-01 | 0.039  | -4.000 | 1.99E-01 | 0.702  |
| TG 42:3 | 2.93E+04 | 2.83E+04 | 3.90E+04 | 3.61E+04 | 4.25E+03 | 4.06E+03 | 0.412  | 3.09E-02 | 1.510  | -3.199 | 5.01E-19 | 18.300 |
| TG 43:0 | 4.56E+04 | 5.92E+04 | 3.19E+04 | 2.48E+04 | 7.89E+03 | 8.71E+03 | -0.515 | 2.94E-02 | 1.531  | -2.016 | 2.17E-17 | 16.664 |
| TG 44:0 | 3.53E+05 | 4.08E+05 | 3.22E+05 | 2.88E+05 | 3.91E+04 | 6.43E+04 | -0.133 | 5.23E-01 | 0.282  | -3.039 | 6.94E-19 | 18.159 |
| TG 44:1 | 6.00E+05 | 6.84E+05 | 5.99E+05 | 6.06E+05 | 5.30E+04 | 8.92E+04 | -0.002 | 9.92E-01 | 0.003  | -3.498 | 4.13E-17 | 16.384 |
| TG 44:2 | 3.44E+05 | 3.53E+05 | 3.41E+05 | 3.15E+05 | 2.53E+04 | 4.69E+04 | -0.012 | 9.49E-01 | 0.023  | -3.752 | 3.29E-20 | 19.483 |
| TG 45:0 | 4.99E+04 | 5.88E+04 | 3.98E+04 | 2.80E+04 | 1.24E+04 | 9.16E+03 | -0.326 | 1.08E-01 | 0.967  | -1.682 | 4.79E-20 | 19.320 |
| TG 45:1 | 7.03E+04 | 7.58E+04 | 7.05E+04 | 5.02E+04 | 1.46E+04 | 1.32E+04 | 0.006  | 9.75E-01 | 0.011  | -2.273 | 1.29E-22 | 21.890 |
| TG 46:0 | 4.04E+05 | 3.57E+05 | 5.16E+05 | 3.05E+05 | 1.12E+05 | 1.02E+05 | 0.354  | 1.48E-02 | 1.829  | -2.203 | 1.14E-28 | 27.945 |
| TG 46:1 | 1.00E+06 | 9.21E+05 | 1.30E+06 | 1.05E+06 | 2.23E+05 | 2.10E+05 | 0.382  | 2.59E-02 | 1.586  | -2.550 | 7.03E-21 | 20.153 |
| TG 46:2 | 8.30E+05 | 6.66E+05 | 1.01E+06 | 6.95E+05 | 1.38E+05 | 1.84E+05 | 0.283  | 5.58E-02 | 1.254  | -2.868 | 1.61E-26 | 25.792 |
| TG 46:3 | 3.00E+05 | 2.28E+05 | 3.35E+05 | 2.10E+05 | 3.72E+04 | 7.53E+04 | 0.158  | 2.50E-01 | 0.602  | -3.172 | 4.45E-30 | 29.352 |
| TG 47:0 | 5.08E+04 | 5.17E+04 | 5.17E+04 | 2.89E+04 | 2.00E+04 | 1.80E+04 | 0.026  | 8.71E-01 | 0.060  | -1.372 | 1.91E-16 | 15.719 |
| TG 47:1 | 1.15E+05 | 1.12E+05 | 1.29E+05 | 7.43E+04 | 3.93E+04 | 2.38E+04 | 0.160  | 3.01E-01 | 0.521  | -1.713 | 5.85E-25 | 24.233 |
| TG 47:2 | 1.01E+05 | 7.45E+04 | 1.17E+05 | 5.76E+04 | 2.82E+04 | 1.39E+05 | 0.214  | 7.81E-02 | 1.107  | -2.058 | 7.35E-07 | 6.134  |
| TG 47:3 | 4.43E+04 | 2.62E+04 | 6.13E+04 | 2.50E+04 | 1.01E+04 | 9.73E+03 | 0.471  | 2.37E-06 | 5.625  | -2.596 | 1.83E-48 | 47.739 |
| TG 48:0 | 5.08E+05 | 3.37E+05 | 8.43E+05 | 3.43E+05 | 3.15E+05 | 1.71E+05 | 0.731  | 1.26E-11 | 10.901 | -1.419 | 6.36E-33 | 32.196 |
| TG 48:1 | 2.06E+06 | 1.33E+06 | 3.28E+06 | 1.67E+06 | 9.31E+05 | 5.71E+05 | 0.674  | 1.30E-08 | 7.887  | -1.817 | 2.82E-31 | 30.549 |
| TG 48:2 | 2.06E+06 | 1.10E+06 | 3.05E+06 | 1.42E+06 | 7.91E+05 | 5.16E+05 | 0.571  | 3.70E-08 | 7.432  | -1.950 | 2.13E-36 | 35.671 |
| TG 48:3 | 1.18E+06 | 6.35E+05 | 1.47E+06 | 6.83E+05 | 3.01E+05 | 2.15E+05 | 0.309  | 2.02E-03 | 2.694  | -2.287 | 6.87E-41 | 40.163 |
| TG 48:4 | 4.53E+05 | 2.90E+05 | 4.81E+05 | 2.48E+05 | 9.12E+04 | 5.75E+04 | 0.085  | 4.60E-01 | 0.337  | -2.399 | 1.38E-37 | 36.860 |
| TG 49:0 | 6.36E+04 | 4.66E+04 | 7.75E+04 | 3.19E+04 | 3.51E+04 | 3.75E+04 | 0.287  | 1.17E-02 | 1.933  | -1.143 | 5.76E-14 | 13.239 |
| TG 49:1 | 2.49E+05 | 1.65E+05 | 3.34E+05 | 1.34E+05 | 1.01E+05 | 4.94E+04 | 0.426  | 5.14E-05 | 4.289  | -1.721 | 4.84E-41 | 40.315 |
| TG 49:2 | 2.62E+05 | 1.32E+05 | 3.44E+05 | 1.21E+05 | 1.07E+05 | 5.21E+04 | 0.394  | 3.97E-06 | 5.401  | -1.683 | 1.76E-46 | 45.753 |
| TG 49:3 | 1.30E+05 | 5.20E+04 | 1.71E+05 | 5.47E+04 | 4.42E+04 | 2.49E+04 | 0.394  | 7.34E-08 | 7.134  | -1.954 | 3.45E-56 | 55.462 |
| TG 50:0 | 6.10E+05 | 3.42E+05 | 1.05E+06 | 3.43E+05 | 4.20E+05 | 2.34E+05 | 0.789  | 6.85E-18 | 17.165 | -1.327 | 1.78E-36 | 35.750 |
| TG 50:1 | 3.48E+06 | 1.57E+06 | 6.72E+06 | 1.81E+06 | 3.12E+06 | 1.56E+06 | 0.949  | 1.17E-31 | 30.933 | -1.537 | 2.13E-52 | 51.671 |
| TG 50:2 | 4.83E+06 | 1.60E+06 | 8.03E+06 | 1.93E+06 | 1.73E+06 | 9.45E+05 | 0.734  | 3.61E-29 | 28.443 | -1.363 | 2.20E-59 | 58.658 |
| TG 50:3 | 3.52E+06 | 1.05E+06 | 5.39E+06 | 1.36E+06 | 5.91E+05 | 3.44E+05 | 0.616  | 3.15E-23 | 22.502 | -1.644 | 1.24E-58 | 57.906 |
| TG 50:4 | 1.65E+06 | 5.48E+05 | 2.20E+06 | 6.47E+05 | 1.30E+05 | 7.47E+04 | 0.411  | 2.95E-10 | 9.530  | -1.896 | 1.53E-46 | 45.816 |
| TG 50:5 | 3.86E+05 | 1.68E+05 | 4.72E+05 | 1.74E+05 | 2.51E+04 | 1.88E+04 | 0.290  | 3.25E-04 | 3.488  | -1.863 | 1.85E-38 | 37.732 |
| TG 50:6 | 8.33E+04 | 4.92E+04 | 9.27E+04 | 3.78E+04 | 3.46E+05 | 1.15E+05 | 0.154  | 1.22E-01 | 0.913  | -1.883 | 6.11E-38 | 37.214 |
| TG 51:1 | 2.33E+05 | 1.29E+05 | 3.57E+05 | 1.27E+05 | 1.18E+05 | 7.87E+04 | 0.615  | 2.53E-11 | 10.597 | -1.605 | 7.36E-39 | 38.133 |
| TG 51:2 | 5.30E+05 | 1.70E+05 | 7.12E+05 | 1.99E+05 | 2.12E+05 | 9.52E+04 | 0.427  | 1.23E-11 | 10.909 | -1.747 | 6.56E-61 | 60.183 |
| TG 51:3 | 1.31E+04 | 9.40E+03 | 1.61E+04 | 1.12E+04 | 4.07E+03 | 7.51E+03 | 0.301  | 3.41E-02 | 1.467  | -1.985 | 1.78E-15 | 14.751 |
| TG 51:4 | 2.34E+05 | 5.56E+04 | 2.72E+05 | 6.88E+04 | 7.14E+04 | 4.75E+04 | 0.215  | 1.94E-05 | 4.712  | -1.927 | 1.42E-62 | 61.847 |
| TG 51:5 | 9.15E+04 | 3.74E+04 | 9.64E+04 | 3.45E+04 | 3.03E+04 | 1.56E+04 | 0.076  | 3.18E-01 | 0.497  | -1.669 | 7.90E-45 | 44.103 |
| TG 52:0 | 3.18E+05 | 1.62E+05 | 4.87E+05 | 1.62E+05 | 1.70E+05 | 9.24E+04 | 0.616  | 9.11E-13 | 12.040 | -1.515 | 1.89E-43 | 42.724 |
| TG 52:1 | 2.43E+06 | 9.93E+05 | 3.98E+06 | 1.15E+06 | 1.32E+06 | 6.69E+05 | 0.712  | 4.49E-21 | 20.348 | -1.591 | 4.46E-53 | 52.351 |
| TG 52:2 | 8.74E+06 | 1.87E+06 | 1.29E+07 | 2.47E+06 | 4.17E+06 | 1.86E+06 | 0.556  | 6.75E-31 | 30.171 | -1.623 | 7.68E-76 | 75.114 |
| TG 52:4 | 7.73E+06 | 2.17E+06 | 1.07E+07 | 2.66E+06 | 2.49E+06 | 1.34E+06 | 0.465  | 4.18E-16 | 15.379 | -2.102 | 1.28E-74 | 73.893 |
| TG 52:5 | 2.36E+06 | 7.60E+05 | 3.13E+06 | 9.51E+05 | 9.07E+05 | 4.58E+05 | 0.404  | 7.17E-10 | 9.145  | -1.786 | 2.63E-56 | 55.580 |
| TG 52:6 | 5.15E+05 | 2.00E+05 | 6.16E+05 | 2.15E+05 | 2.58E+05 | 2.01E+05 | 0.258  | 5.14E-04 | 3.289  | -1.257 | 5.41E-25 | 24.267 |
| TG 53:0 | 5.42E+04 | 2.24E+04 | 5.09E+04 | 1.68E+04 | 4.92E+04 | 1.99E+04 | -0.091 | 2.22E-01 | 0.654  | -0.050 | 3.65E-01 | 0.438  |
| TG 53:1 | 1.00E+05 | 5.09E+04 | 1.39E+05 | 5.63E+04 | 3.65E+04 | 1.95E+04 | 0.470  | 1.95E-07 | 6.709  | -1.928 | 2.33E-46 | 45.632 |
| TG 53:2 | 3.12E+05 | 8.98E+04 | 4.53E+05 | 1.42E+05 | 1.19E+05 | 5.33E+04 | 0.536  | 1.73E-15 | 14.762 | -1.932 | 5.09E-59 | 58.294 |
| TG 53:3 | 3.86E+05 | 8.44E+04 | 4.32E+05 | 1.15E+05 | 1.23E+05 | 7.00E+04 | 0.164  | 9.49E-04 | 3.023  | -1.813 | 7.49E-61 | 60.126 |
| TG 53:4 | 1.78E+04 | 1.25E+04 | 2.19E+04 | 1.27E+04 | 7.36E+03 | 5.96E+04 | 0.304  | 1.72E-02 | 1.764  | -1.574 | 1.53E-01 | 0.816  |
| TG 53:5 | 1.15E+05 | 3.08E+04 | 1.17E+05 | 2.69E+04 | 5.23E+04 | 2.37E+04 | 0.025  | 6.12E-01 | 0.213  | -1.164 | 3.29E-46 | 45.483 |
| TG 54:0 | 8.28E+04 | 4.96E+04 | 1.07E+05 | 4.94E+04 | 3.87E+04 | 4.38E+04 | 0.367  | 5.26E-04 | 3.279  | -1.463 | 1.25E-19 | 18.903 |
| TG 54:1 | 5.81E+05 | 3.50E+05 | 8.30E+05 | 3.51E+05 | 2.26E+05 | 1.98E+05 | 0.513  | 5.57E-07 | 6.254  | -1.875 | 8.62E-37 | 36.064 |
| TG 54:2 | 1.92E+06 | 7.31E+05 | 2.67E+06 | 8.45E+05 | 7.82E+05 | 4.67E+05 | 0.481  | 3.88E-11 | 10.411 | -1.774 | 1.02E-51 | 50.992 |
| TG 54:3 | 2.90E+06 | 9.43E+05 | 3.16E+06 | 8.10E+05 | 1.26E+06 | 5.93E+05 | 0.127  | 2.83E-02 | 1.548  | -1.331 | 3.02E-50 | 49.519 |
| TG 54:4 | 3.76E+06 | 1.22E+06 | 3.85E+06 | 9.54E+05 | 1.42E+06 | 2.93E+06 | 0.035  | 5.39E-01 | 0.268  | -1.439 | 3.19E-11 | 10.496 |
| TG 54:5 | 3.40E+06 | 1.21E+06 | 3.54E+06 | 1.02E+06 | 1.53E+06 | 6.48E+05 | 0.061  | 3.39E-01 | 0.470  | -1.216 | 3.13E-43 | 42.505 |
| TG 54:6 | 2.17E+06 | 9.75E+05 | 2.37E+06 | 8.75E+05 | 1.17E+06 | 4.94E+05 | 0.129  | 1.12E-01 | 0      |        |          |        |

|          |          |          |          |          |          |          |        |          |        |        |          |        |
|----------|----------|----------|----------|----------|----------|----------|--------|----------|--------|--------|----------|--------|
| TG 58:2  | 6.69E+04 | 1.21E+05 | 9.33E+04 | 9.77E+04 | 1.22E+04 | 7.43E+04 | 0.479  | 8.20E-02 | 1.086  | -2.929 | 2.30E-09 | 8.637  |
| TG 58:3  | 5.57E+04 | 7.91E+04 | 8.44E+04 | 7.43E+04 | 1.30E+04 | 3.36E+04 | 0.600  | 6.96E-03 | 2.157  | -2.700 | 9.39E-17 | 16.027 |
| TG 58:4  | 3.76E+04 | 2.38E+04 | 5.88E+04 | 2.57E+04 | 1.98E+04 | 2.90E+04 | 0.646  | 2.29E-09 | 8.639  | -1.572 | 2.07E-18 | 17.684 |
| TG 58:5  | 6.87E+04 | 2.43E+04 | 1.25E+05 | 4.30E+04 | 6.68E+04 | 5.25E+04 | 0.868  | 5.19E-25 | 24.285 | -0.909 | 4.48E-15 | 14.348 |
| TG 58:6  | 1.14E+05 | 3.56E+04 | 1.55E+05 | 4.67E+04 | 1.31E+05 | 5.30E+04 | 0.451  | 5.62E-12 | 11.250 | -0.245 | 3.38E-04 | 3.471  |
| TG 58:7  | 1.80E+05 | 6.57E+04 | 2.08E+05 | 7.25E+04 | 2.35E+05 | 8.22E+04 | 0.202  | 4.79E-03 | 2.319  | 0.180  | 1.75E-02 | 1.757  |
| TG 58:8  | 2.34E+05 | 9.61E+04 | 2.47E+05 | 1.03E+05 | 3.27E+05 | 1.22E+05 | 0.074  | 3.67E-01 | 0.435  | 0.408  | 1.39E-06 | 5.858  |
| TG 58:9  | 2.12E+05 | 1.03E+05 | 2.08E+05 | 9.06E+04 | 2.96E+05 | 1.19E+05 | -0.021 | 8.15E-01 | 0.089  | 0.508  | 2.80E-08 | 7.552  |
| TG 58:10 | 1.37E+05 | 7.90E+04 | 1.33E+05 | 6.60E+04 | 1.98E+05 | 9.25E+04 | -0.049 | 6.47E-01 | 0.189  | 0.579  | 3.65E-08 | 7.438  |
| TG 58:11 | 3.89E+04 | 2.98E+04 | 3.72E+04 | 3.01E+04 | 4.91E+04 | 8.27E+04 | -0.067 | 6.68E-01 | 0.175  | 0.402  | 1.39E-02 | 1.858  |
| TG 60:10 | 4.46E+04 | 2.39E+04 | 4.14E+04 | 2.12E+04 | 1.06E+05 | 4.83E+05 | -0.108 | 3.02E-01 | 0.519  | 1.361  | 6.54E-03 | 2.185  |
| TG 60:11 | 4.57E+04 | 3.07E+04 | 4.57E+04 | 2.99E+04 | 1.23E+05 | 2.07E+05 | 0.000  | 9.98E-01 | 0.001  | 1.432  | 1.41E-06 | 5.850  |
| TG 60:12 | 3.50E+04 | 3.21E+04 | 3.67E+04 | 3.47E+04 | 8.94E+04 | 6.04E+04 | 0.072  | 6.97E-01 | 0.156  | 1.284  | 2.69E-14 | 13.570 |
| TG 62:1  | 1.93E+03 | 4.73E+03 | 2.33E+03 | 4.20E+03 | 3.98E+02 | 1.29E+04 | 0.274  | 5.12E-01 | 0.291  | -2.548 | 8.30E-01 | 0.081  |
| TG 62:12 | 1.03E+04 | 8.51E+03 | 1.08E+04 | 8.37E+03 | 3.16E+04 | 1.70E+04 | 0.075  | 6.35E-01 | 0.197  | 1.548  | 3.28E-23 | 22.484 |
| TG 62:14 | 6.71E+03 | 7.30E+03 | 6.43E+03 | 7.09E+03 | 2.35E+04 | 4.47E+05 | -0.061 | 7.78E-01 | 0.109  | 1.872  | 1.15E-01 | 0.940  |

**Supplementary Table S2. Lipid group classification.** Lipidomics dataset was collapsed into groups of lipids based on the lipid class and the number of double bonds within the fatty acid tails. Group names, the number of lipids within each group, and a list of the individual lipids composed in the group are reported.

| Lipid Class                        | Group Name  | Saturation                 | Number of lipids | Lipid Species                                                                                                                                                                                                                                                                                                                                                                                                          |
|------------------------------------|-------------|----------------------------|------------------|------------------------------------------------------------------------------------------------------------------------------------------------------------------------------------------------------------------------------------------------------------------------------------------------------------------------------------------------------------------------------------------------------------------------|
| acylcarnitine                      | AC          | all                        | 6                | Acylcarnitine 16:0, Acylcarnitine 18:0, Acylcarnitine 24:0, Acylcarnitine 26:0, Acylcarnitine 18:1, Acylcarnitine 18:2                                                                                                                                                                                                                                                                                                 |
| cholesteryl ester                  | CE          | saturated, monounsaturated | 5                | 16:0 Cholesteryl ester, 18:0 Cholesteryl ester, 16:1 Cholesteryl ester, 17:1 Cholesteryl ester, 18:1 Cholesteryl ester                                                                                                                                                                                                                                                                                                 |
|                                    | CE-poly     | polyunsaturated            | 8                | 18:2 Cholesteryl ester, 18:3 Cholesteryl ester, 20:3 Cholesteryl ester, 20:4 Cholesteryl ester, 22:4 Cholesteryl ester, 20:5 Cholesteryl ester, 22:5 Cholesteryl ester, 22:6 Cholesteryl ester                                                                                                                                                                                                                         |
| ceramide                           | CER-sat     | saturated                  | 10               | Cer[NS] 34:0, Cer[NS] 36:0, Cer[NS] 38:0, Cer[NS] 40:0, Cer[NS] 41:0, Cer[NS] 42:0, Cer[EODS] 53:0, Cer[NP] 34:0, Cer[NP] 40:0, Cer[NP] 42:0,                                                                                                                                                                                                                                                                          |
|                                    | CER-mono    | monounsaturated            | 16               | Cer[NS] 32:1, Cer[NS] 33:1, Cer[NS] 34:1, Cer[NS] 35:1, Cer[NS] 36:1, Cer[NS] 37:1, Cer[NS] 38:1, Cer[NS] 39:1, Cer[NS] 40:1, Cer[NS] 41:1, Cer[NS] 42:1, Cer[NS] 43:1, Cer[NS] 44:1, Cer[AS] 41:1, Cer[EODS] 49:1, Cer[NP] 42:1                                                                                                                                                                                       |
|                                    | CER-poly    | polyunsaturated            | 15               | Cer[NS] 34:2, Cer[NS] 36:2, Cer[NS] 38:2, Cer[NS] 39:2, Cer[NS] 40:2, Cer[NS] 41:2, Cer[NS] 42:2, Cer[NS] 43:2, Cer[AS] 42:2, Cer[EODS] 57:2, Cer[NS] 41:3, Cer[NS] 42:3, Cer[NS] 43:3, Cer[NS] 33:4, Cer[NS] 37:4                                                                                                                                                                                                     |
| diglyceride                        | DG-sat      | saturated                  | 13               | DG 30:0, DG 31:0, DG 32:0, DG 33:0, DG 34:0, DG 36:0, DG 38:0, DG 30:1, DG 32:1, DG 33:1, DG 35:1, DG 36:1, DG 38:1                                                                                                                                                                                                                                                                                                    |
|                                    | DG-mono     | monounsaturated            | 9                | DG 32:2, DG 34:2, DG 35:2, DG 36:2, DG 38:2, DG 34:3, DG 35:3, DG 36:3, DG 38:3                                                                                                                                                                                                                                                                                                                                        |
|                                    | DG-poly     | polyunsaturated            | 8                | DG 36:4, DG 38:4, DG 38:5, DG 38:6, DG 38:7, DG 40:7, DG 40:8                                                                                                                                                                                                                                                                                                                                                          |
| free fatty acid                    | FFA-sat     | saturated                  | 5                | FFA18:0, FFA16:0, FFA20:0, FFA22:0, FFA24:0                                                                                                                                                                                                                                                                                                                                                                            |
|                                    | FFA-mono    | monounsaturated            | 4                | FFA18:1, FFA20:1, FFA22:1, FFA24:1                                                                                                                                                                                                                                                                                                                                                                                     |
|                                    | FFA-poly    | polyunsaturated            | 7                | FFA18:2, FFA20:2, FFA22:2, FFA24:2, FFA22:3, FFA24:3, FFA20:4                                                                                                                                                                                                                                                                                                                                                          |
| glucosylceramide                   | GlcCer      | all                        | 9                | GlcCer[NS] 32:1, GlcCer[NS] 34:1, GlcCer[NS] 38:1, GlcCer[NS] 40:1, GlcCer[NS] 41:1, GlcCer[NS] 42:1, GlcCer[NS] 43:1, GlcCer[NS] 41:2, GlcCer[NS] 42:2                                                                                                                                                                                                                                                                |
|                                    | LysoPC-sat  | saturated                  | 10               | LysoPC 14:0, LysoPC 15:0, LysoPC 16:0, LysoPC 17:0, LysoPC 18:0, LysoPC 19:0, LysoPC 20:0, LysoPC 22:0, LysoPC 24:0, LysoPC 26:0                                                                                                                                                                                                                                                                                       |
| lysophosphatidylcholine            | LysoPC-mono | monounsaturated            | 7                | LysoPC 16:1, LysoPC 17:1, LysoPC 18:1, LysoPC 19:1, LysoPC 20:1, LysoPC 24:1, LysoPC 26:1                                                                                                                                                                                                                                                                                                                              |
|                                    | LysoPC-poly | polyunsaturated            | 12               | LysoPC 18:2, LysoPC 20:2, LysoPC 26:2, LysoPC 18:3, LysoPC 20:3, LysoPC 20:4, LysoPC 22:4, LysoPC 24:4, LysoPC 26:4, LysoPC 20:5, LysoPC 22:5, LysoPC 22:6                                                                                                                                                                                                                                                             |
|                                    | LysoPE-sat  | saturated                  | 3                | LysoPE 16:0, LysoPE 18:0, LysoPE 24:0                                                                                                                                                                                                                                                                                                                                                                                  |
| lysophosphatidylethanolamine       | LysoPE-poly | polyunsaturated            | 5                | LysoPE 18:2, LysoPE 20:3, LysoPE 20:4, LysoPE 22:5, LysoPE 22:6                                                                                                                                                                                                                                                                                                                                                        |
|                                    | PC-sat      | saturated                  | 27               | PC 22:0, PC 23:0, PC 24:0, PC 26:0, PC 28:0, PC 29:0, PC 30:0, PC 31:0, PC 32:0, PC 33:0, PC 34:0, PC 36:0, PC 40:0, PC 25:1, PC 26:1, PC 28:1, PC 30:1, PC 31:1, PC 32:1, PC 33:1, PC 34:1, PC 35:1, PC 36:1, PC 37:1, PC 38:1, PC 40:1, PC 42:1                                                                                                                                                                      |
| phosphatidylcholine                | PC-mono     | monounsaturated            | 24               | PC 30:2, PC 31:2, PC 32:2, PC 33:2, PC 34:2, PC 35:2, PC 36:2, PC 37:2, PC 38:2, PC 40:2, PC 42:2, PC 44:2, PC 30:3, PC 32:3, PC 33:3, PC 34:3, PC 35:3, PC 36:3, PC 37:3, PC 38:3, PC 39:3, PC 40:3, PC 42:3, PC 44:3                                                                                                                                                                                                 |
|                                    | PC-poly     | polyunsaturated            | 45               | PC 40:10, PC 42:10, PC 42:11, PC 32:4, PC 34:4, PC 35:4, PC 36:4, PC 37:4, PC 38:4, PC 39:4, PC 40:4, PC 42:4, PC 44:4, PC 46:4, PC 34:5, PC 35:5, PC 36:5, PC 37:5, PC 38:5, PC 39:5, PC 40:5, PC 41:5, PC 42:5, PC 44:5, PC 46:5, PC 35:6, PC 36:6, PC 37:6, PC 38:6, PC 39:6, PC 40:6, PC 41:6, PC 42:6, PC 44:6, PC 35:7, PC 36:7, PC 37:7, PC 38:7, PC 39:7, PC 40:7, PC 42:7, PC 40:8, PC 42:8, PC 40:9, PC 42:9 |
|                                    | PE-sat      | saturated                  | 12               | PE 30:0, PE 32:0, PE 33:0, PE 34:0, PE 35:0, PE 36:0, PE 32:1, PE 33:1, PE 34:1, PE 35:1, PE 36:1, PE 38:1                                                                                                                                                                                                                                                                                                             |
| phosphatidylethanolamine           | PE-mono     | monounsaturated            | 13               | PE 32:2, PE 33:2, PE 34:2, PE 35:2, PE 36:2, PE 37:2, PE 38:2, PE 40:2, PE 34:3, PE 35:3, PE 36:3, PE 37:3, PE 38:3                                                                                                                                                                                                                                                                                                    |
|                                    | PE-poly     | polyunsaturated            | 19               | PE 42:10, PE 34:4, PE 35:4, PE 36:4, PE 37:4, PE 38:4, PE 40:4, PE 36:5, PE 37:5, PE 38:5, PE 40:5, PE 36:6, PE 37:6, PE 38:6, PE 39:6, PE 40:6, PE 38:7, PE 40:7, PE 40:8                                                                                                                                                                                                                                             |
|                                    | PG-sat      | saturated                  | 6                | PG 32:0, PG 33:0, PG 34:0, PG 36:0, PG 32:1, PG 34:1                                                                                                                                                                                                                                                                                                                                                                   |
| phosphatidylglycerol               | PG-mono     | monounsaturated            | 2                | PG 34:2, PG 36:2                                                                                                                                                                                                                                                                                                                                                                                                       |
|                                    | PI-sat      | saturated                  | 2                | PI 34:1, PI 36:1                                                                                                                                                                                                                                                                                                                                                                                                       |
| phosphatidylinositol               | PI-mono     | monounsaturated            | 4                | PI 34:2, PI 36:2, PI 36:3, PI 38:3                                                                                                                                                                                                                                                                                                                                                                                     |
|                                    | PI-poly     | polyunsaturated            | 6                | PI 36:4, PI 38:4, PI 38:5, PI 40:5, PI 38:6, PI 40:6                                                                                                                                                                                                                                                                                                                                                                   |
|                                    | PLPC-sat    | saturated                  | 17               | PL-PC 24:0, PL-PC 26:0, PL-PC 30:0, PL-PC 32:0, PL-PC 34:0, PL-PC 35:0, PL-PC 36:0, PL-PC 40:0, PL-PC 42:0, PL-PC 32:1, PL-PC 34:1, PL-PC 35:1, PL-PC 36:1, PL-PC 37:1, PL-PC 40:1, PL-PC 42:1, PL-PC 44:1                                                                                                                                                                                                             |
| Plasmenyl-phosphatidylcholine      | PLPC-mono   | monounsaturated            | 16               | PL-PC 34:2, PL-PC 35:2, PL-PC 36:2, PL-PC 37:2, PL-PC 40:2, PL-PC 42:2, PL-PC 44:2, PL-PC 34:3, PL-PC 35:3, PL-PC 36:3, PL-PC 37:3, PL-PC 38:3, PL-PC 40:3, PL-PC 42:3, PL-PC 43:3, PL-PC 44:3                                                                                                                                                                                                                         |
|                                    | PLPC-poly   | polyunsaturated            | 21               | PL-PC 34:4, PL-PC 36:4, PL-PC 37:4, PL-PC 38:4, PL-PC 40:4, PL-PC 41:4, PL-PC 42:4, PL-PC 43:4, PL-PC 44:4, PL-PC 46:4, PL-PC 36:5, PL-PC 38:5, PL-PC 39:5, PL-PC 40:5, PL-PC 42:5, PL-PC 44:5, PL-PC 36:6, PL-PC 37:6, PL-PC 38:6, PL-PC 40:6, PL-PC 44:6                                                                                                                                                             |
|                                    | PLPE-sat    | saturated                  | 7                | PL-PE 32:0, PL-PE 32:1, PL-PE 34:1, PL-PE 35:1, PL-PE 36:1, PL-PE 38:1, PL-PE 40:1                                                                                                                                                                                                                                                                                                                                     |
| Plasmenyl-phosphatidylethanolamine | PLPE-mono   | monounsaturated            | 11               | PL-PE 32:2, PL-PE 34:2, PL-PE 35:2, PL-PE 36:2, PL-PE 37:2, PL-PE 38:2, PL-PE 40:2, PL-PE 34:3, PL-PE 36:3, PL-PE 38:3, PL-PE 40:3                                                                                                                                                                                                                                                                                     |
|                                    | PLPE-poly   | polyunsaturated            | 18               | PL-PE 34:4, PL-PE 35:4, PL-PE 36:4, PL-PE 37:4, PL-PE 38:4, PL-PE 39:4, PL-PE 40:4, PL-PE 42:4, PL-PE 36:5, PL-PE 37:5, PL-PE 38:5, PL-PE 40:5, PL-PE 36:6, PL-PE 37:6, PL-PE 38:6, PL-PE 39:6, PL-PE 40:6, PL-PE 42:6                                                                                                                                                                                                 |
|                                    | SM-sat      | saturated                  | 24               | SM 30:0, SM 32:0, SM 33:0, SM 34:0, SM 36:0, SM 38:0, SM 40:0, SM 41:0, SM 29:1, SM 30:1, SM 31:1, SM 32:1, SM 33:1, SM 34:1, SM 35:1, SM 36:1, SM 37:1, SM 38:1, SM 39:1, SM 40:1, SM 41:1, SM 42:1, SM 43:1, SM 44:1                                                                                                                                                                                                 |

|               |         |                 |    |                                                                                                                                                                                                                                                                                                                                                                                                                                                                  |
|---------------|---------|-----------------|----|------------------------------------------------------------------------------------------------------------------------------------------------------------------------------------------------------------------------------------------------------------------------------------------------------------------------------------------------------------------------------------------------------------------------------------------------------------------|
| sphingomyelin | SM-mono | monounsaturated | 23 | SM 30:2, SM 32:2, SM 33:2, SM 34:2, SM 35:2, SM 36:2, SM 37:2, SM 38:2, SM 39:2, SM 40:2, SM 41:2, SM 42:2, SM 43:2, SM 44:2, SM 34:3, SM 36:3, SM 38:3, SM 39:3, SM 40:3, SM 41:3, SM 42:3, SM 43:3, SM 44:3                                                                                                                                                                                                                                                    |
|               | SM-poly | polyunsaturated | 18 | SM 36:4, SM 38:4, SM 40:4, SM 42:4, SM 43:4, SM 44:4, SM 45:4, SM 38:5, SM 40:5, SM 42:5, SM 44:5, SM 47:5, SM 35:6, SM 42:6, SM 44:6, SM 42:7, SM 43:7, SM 44:7                                                                                                                                                                                                                                                                                                 |
| triglyceride  | TG-sat  | saturated       | 50 | TG 36:0, TG 38:0, TG 39:0, TG 40:0, TG 41:0, TG 42:0, TG 43:0, TG 44:0, TG 45:0, TG 46:0, TG 47:0, TG 48:0, TG 49:0, TG 50:0, TG 51:0, TG 52:0, TG 53:0, TG 54:0, TG 56:0, TG 40:1, TG 42:1, TG 44:1, TG 45:1, TG 46:1, TG 47:1, TG 48:1, TG 49:1, TG 50:1, TG 51:1, TG 52:1, TG 53:1, TG 54:1, TG 55:1, TG 56:1, TG 58:1, TG 62:1, TG 42:2, TG 44:2, TG 46:2, TG 47:2, TG 48:2, TG 49:2, TG 50:2, TG 51:2, TG 52:2, TG 53:2, TG 54:2, TG 55:2, TG 56:2, TG 58:2 |
|               | TG-mono | monounsaturated | 28 | TG 42:3, TG 46:3, TG 47:3, TG 48:3, TG 49:3, TG 50:3, TG 51:3, TG 52:3, TG 53:3, TG 54:3, TG 55:3, TG 56:3, TG 58:3, TG 48:4, TG 50:4, TG 51:4, TG 52:4, TG 53:4, TG 54:4, TG 56:4, TG 58:4, TG 50:5, TG 51:5, TG 52:5, TG 53:5, TG 54:5, TG 56:5, TG 58:5                                                                                                                                                                                                       |
|               | TG-poly | polyunsaturated | 21 | TG 50:6, TG 52:6, TG 54:6, TG 56:6, TG 58:6, TG 54:7, TG 56:7, TG 58:7, TG 54:8, TG 56:8, TG 58:8, TG 56:9, TG 58:9, TG 56:10, TG 58:10, TG 60:10, TG 58:11, TG 60:11, TG 60:12, TG 62:12, TG 62:14                                                                                                                                                                                                                                                              |



**Supplementary Table S3. Debiased Sparse Partial Correlation coefficients depicting relationship between lipid clusters within and between M1, M3, and CB.** Partial correlation coefficients represented have an FDR adjusted p-value <0.1.

| Lipid Group 1  | Lipid Group 2  | r-value | unadjusted p-value | adjusted p-value |
|----------------|----------------|---------|--------------------|------------------|
| M1 CE          | M1 CE-poly     | 0.459   | 0.000619           | 0.0159           |
| M1 CE          | M1 PC-sat      | 0.536   | 0.000695           | 0.0172           |
| M1 CE-poly     | M1 PC-poly     | 0.589   | 0.00027            | 0.00714          |
| M1 CE-poly     | M1 DG-mono     | -0.573  | 0.000713           | 0.0172           |
| M1 CE-poly     | M1 SM-sat      | 0.538   | 0.00163            | 0.0351           |
| M1 CER-mono    | M1 CER-poly    | 1       | 3.83E-17           | 7.84E-15         |
| M1 CER-mono    | M1 SM-sat      | 1       | 1.19E-05           | 0.000374         |
| M1 CER-sat     | M1 CER-mono    | 1       | 9.30E-08           | 4.24E-06         |
| M1 DG-mono     | M1 DG-poly     | 1       | 1.79E-14           | 2.09E-12         |
| M1 DG-mono     | M1 TG-mono     | 0.912   | 1.10E-06           | 4.11E-05         |
| M1 DG-poly     | M1 TG-poly     | 1       | 2.90E-15           | 3.96E-13         |
| M1 DG-sat      | M1 TG-sat      | 1       | 1.63E-20           | 6.70E-18         |
| M1 DG-sat      | M1 DG-mono     | 1       | 7.98E-07           | 3.12E-05         |
| M1 FFA-mono    | M1 FFA-poly    | 1       | 3.30E-22           | 2.71E-19         |
| M1 FFA-sat     | M1 FFA-mono    | 0.42    | 0.00323            | 0.0602           |
| M1 GlcCer      | M1 PLPC-sat    | 0.685   | 2.57E-05           | 0.000726         |
| M1 LysoPC-mono | M1 LysoPC-poly | 1       | 2.81E-06           | 1.00E-04         |
| M1 LysoPC-poly | M1 LysoPE-poly | 1       | 9.76E-19           | 2.67E-16         |
| M1 LysoPC-poly | M1 LysoPE-sat  | 0.578   | 0.00312            | 0.0595           |
| M1 LysoPC-sat  | M1 LysoPC-mono | 1       | 8.30E-12           | 7.56E-10         |
| M1 LysoPC-sat  | M1 LysoPE-sat  | 0.801   | 1.67E-05           | 0.000507         |
| M1 PC-mono     | M1 PE-mono     | 0.815   | 2.54E-05           | 0.000726         |
| M1 PC-mono     | M1 TG-mono     | 0.534   | 0.00188            | 0.0385           |
| M1 PC-poly     | M1 TG-poly     | 0.926   | 7.49E-07           | 3.07E-05         |
| M1 PC-poly     | M1 PE-poly     | 0.809   | 3.56E-06           | 0.000122         |
| M1 PC-sat      | M1 PC-mono     | 0.89    | 4.47E-06           | 0.000147         |
| M1 PC-sat      | M1 PE-sat      | 0.676   | 0.00106            | 0.0236           |
| M1 PC-sat      | M1 PLPE-sat    | 0.59    | 0.00181            | 0.038            |
| M1 PC-sat      | M1 TG-sat      | 0.606   | 0.00295            | 0.0577           |
| M1 PE-mono     | M1 PE-poly     | 0.918   | 2.95E-07           | 1.27E-05         |
| M1 PE-mono     | M1 PG-mono     | 0.474   | 0.00254            | 0.0509           |
| M1 PE-sat      | M1 PE-mono     | 1       | 2.41E-09           | 1.32E-07         |
| M1 PE-sat      | M1 PE-poly     | 0.615   | 0.000929           | 0.0218           |
| M1 PE-sat      | M1 TG-sat      | 0.599   | 0.00541            | 0.0986           |
| M1 PI-mono     | M1 PI-poly     | 1       | 9.23E-11           | 6.31E-09         |
| M1 PI-sat      | M1 PI-mono     | 1       | 8.16E-10           | 5.15E-08         |
| M1 PI-sat      | M1 PI-poly     | 1       | 5.49E-08           | 2.65E-06         |
| M1 PLPC-mono   | M1 PLPC-poly   | 0.766   | 3.84E-05           | 0.00105          |
| M1 PLPC-mono   | M1 PLPE-mono   | 0.627   | 0.001              | 0.0228           |
| M1 PLPC-poly   | M1 PLPE-poly   | 1       | 3.78E-11           | 2.82E-09         |
| M1 PLPC-sat    | M1 PLPC-mono   | 1       | 3.24E-11           | 2.66E-09         |
| M1 PLPE-mono   | M1 PLPE-poly   | 1       | 5.46E-08           | 2.65E-06         |
| M1 PLPE-sat    | M1 PLPE-mono   | 1       | 5.95E-12           | 6.09E-10         |
| M1 SM-mono     | M1 SM-poly     | 1       | 5.90E-17           | 9.68E-15         |



|                |                |        |          |          |
|----------------|----------------|--------|----------|----------|
| M1 SM-sat      | M1 SM-mono     | 1      | 1.02E-09 | 6.00E-08 |
| M3 AcylCN      | M3 LysoPC-mono | 0.812  | 1.85E-05 | 0.000583 |
| M3 AcylCN      | M3 FFA-poly    | 0.586  | 0.00011  | 0.00292  |
| M3 CE          | M3 CE-poly     | 0.546  | 9.39E-05 | 0.00257  |
| M3 CE          | M3 PI-sat      | 0.382  | 0.00248  | 0.0462   |
| M3 CE          | M3 PC-sat      | 0.465  | 0.00275  | 0.0481   |
| M3 CE-poly     | M3 DG-mono     | -0.6   | 0.000637 | 0.0145   |
| M3 CE-poly     | M3 PC-poly     | 0.557  | 0.000879 | 0.0176   |
| M3 CE-poly     | M3 TG-mono     | -0.444 | 0.00535  | 0.082    |
| M3 CER-mono    | M3 CER-poly    | 1      | 1.33E-17 | 1.09E-14 |
| M3 CER-mono    | M3 SM-sat      | 0.799  | 7.04E-05 | 0.00199  |
| M3 CER-mono    | M3 SM-poly     | -0.495 | 0.00276  | 0.0481   |
| M3 CER-poly    | M3 SM-mono     | 0.637  | 0.000627 | 0.0145   |
| M3 CER-sat     | M3 CER-mono    | 0.799  | 9.30E-06 | 0.000318 |
| M3 DG-mono     | M3 DG-poly     | 1      | 4.31E-10 | 2.72E-08 |
| M3 DG-mono     | M3 TG-mono     | 0.759  | 2.34E-05 | 0.000711 |
| M3 DG-poly     | M3 TG-poly     | 1      | 2.01E-11 | 1.50E-09 |
| M3 DG-sat      | M3 TG-sat      | 1      | 2.58E-14 | 5.30E-12 |
| M3 DG-sat      | M3 DG-mono     | 1      | 4.64E-10 | 2.72E-08 |
| M3 FFA-mono    | M3 FFA-poly    | 1      | 2.31E-14 | 5.30E-12 |
| M3 FFA-sat     | M3 FFA-mono    | 0.428  | 0.00258  | 0.047    |
| M3 FFA-sat     | M3 LysoPE-poly | 0.354  | 0.0054   | 0.082    |
| M3 GlcCer      | M3 PLPC-sat    | 0.787  | 1.09E-06 | 4.27E-05 |
| M3 LysoPC-mono | M3 LysoPC-poly | 1      | 2.62E-12 | 2.39E-10 |
| M3 LysoPC-poly | M3 LysoPE-poly | 1      | 5.55E-09 | 2.84E-07 |
| M3 LysoPC-sat  | M3 LysoPC-mono | 1      | 6.05E-11 | 4.13E-09 |
| M3 LysoPC-sat  | M3 LysoPE-sat  | 1      | 8.29E-09 | 4.00E-07 |
| M3 LysoPC-sat  | M3 LysoPC-poly | 0.812  | 0.000762 | 0.0164   |
| M3 PC-mono     | M3 PE-mono     | 0.644  | 0.000934 | 0.0182   |
| M3 PC-poly     | M3 TG-poly     | 0.989  | 2.03E-08 | 9.27E-07 |
| M3 PC-poly     | M3 PE-poly     | 0.735  | 2.35E-06 | 8.76E-05 |
| M3 PC-poly     | M3 PI-poly     | 0.501  | 0.00362  | 0.0619   |
| M3 PC-poly     | M3 PLPC-poly   | 0.487  | 0.00514  | 0.0811   |
| M3 PC-sat      | M3 PC-mono     | 1      | 8.94E-14 | 1.47E-11 |
| M3 PC-sat      | M3 TG-sat      | 1      | 1.61E-07 | 6.94E-06 |
| M3 PE-mono     | M3 PG-mono     | 0.521  | 0.00208  | 0.0397   |
| M3 PE-sat      | M3 PE-mono     | 1      | 1.32E-11 | 1.09E-09 |
| M3 PE-sat      | M3 PE-poly     | 0.535  | 0.000784 | 0.0165   |
| M3 PE-sat      | M3 TG-sat      | 0.552  | 0.00443  | 0.0712   |
| M3 PG-mono     | M3 PI-mono     | 0.563  | 0.000212 | 0.00543  |
| M3 PG-mono     | M3 TG-mono     | 0.43   | 0.00439  | 0.0712   |
| M3 PG-sat      | M3 PI-poly     | 0.604  | 1.41E-05 | 0.000461 |
| M3 PI-mono     | M3 PI-poly     | 1      | 2.73E-13 | 3.74E-11 |
| M3 PI-sat      | M3 PI-poly     | 0.539  | 0.000355 | 0.00883  |
| M3 PI-sat      | M3 PI-mono     | 0.496  | 0.000807 | 0.0165   |
| M3 PLPC-mono   | M3 PLPC-poly   | 0.559  | 0.000381 | 0.00919  |
| M3 PLPC-mono   | M3 PLPE-mono   | 0.552  | 0.000741 | 0.0164   |
| M3 PLPC-poly   | M3 PLPE-poly   | 1      | 7.87E-10 | 4.30E-08 |

|                |                |        |          |          |
|----------------|----------------|--------|----------|----------|
| M3 PLPC-sat    | M3 PLPC-mono   | 0.776  | 1.00E-06 | 4.11E-05 |
| M3 PLPC-sat    | M3 PLPE-mono   | 0.503  | 0.00412  | 0.069    |
| M3 PLPE-mono   | M3 PLPE-poly   | 0.821  | 3.45E-06 | 0.000123 |
| M3 PLPE-sat    | M3 PLPE-mono   | 1      | 2.37E-15 | 9.70E-13 |
| M3 SM-mono     | M3 SM-poly     | 1      | 4.02E-13 | 4.56E-11 |
| M3 SM-sat      | M3 SM-mono     | 1      | 4.45E-13 | 4.56E-11 |
| M3 TG-sat      | M3 TG-mono     | 0.724  | 4.27E-05 | 0.00125  |
| CB AcylCN      | CB SM-poly     | 0.331  | 0.00447  | 0.0833   |
| CB CE          | CB LysoPC-mono | 0.456  | 0.00226  | 0.0514   |
| CB CE          | CB CE-poly     | 0.377  | 0.00425  | 0.081    |
| CB CE-poly     | CB PLPC-poly   | 0.694  | 4.01E-05 | 0.00132  |
| CB CE-poly     | CB LysoPC-poly | 0.664  | 0.00023  | 0.00672  |
| CB CE-poly     | CB DG-mono     | -0.594 | 0.00191  | 0.046    |
| CB CE-poly     | CB SM-poly     | 0.374  | 0.00555  | 0.0989   |
| CB CER-mono    | CB CER-poly    | 1      | 6.93E-09 | 7.10E-07 |
| CB CER-sat     | CB CER-poly    | 0.936  | 2.55E-06 | 0.000105 |
| CB CER-sat     | CB LysoPC-sat  | 0.636  | 0.000333 | 0.00943  |
| CB DG-mono     | CB DG-poly     | 1      | 8.83E-08 | 5.20E-06 |
| CB DG-mono     | CB TG-mono     | 1      | 2.09E-06 | 9.50E-05 |
| CB DG-mono     | CB PI-mono     | 0.715  | 0.00251  | 0.0556   |
| CB DG-mono     | CB TG-poly     | -0.476 | 0.00543  | 0.0989   |
| CB DG-poly     | CB TG-poly     | 0.948  | 4.76E-10 | 9.76E-08 |
| CB DG-sat      | CB TG-sat      | 1      | 2.36E-06 | 0.000102 |
| CB DG-sat      | CB DG-mono     | 1      | 4.01E-06 | 0.000149 |
| CB FFA-mono    | CB FFA-poly    | 1      | 7.13E-19 | 5.85E-16 |
| CB FFA-sat     | CB FFA-mono    | 0.552  | 0.00046  | 0.0126   |
| CB GlcCer      | CB SM-mono     | 0.808  | 0.000106 | 0.00335  |
| CB LysoPC-mono | CB LysoPC-poly | 0.972  | 3.42E-06 | 0.000134 |
| CB LysoPC-poly | CB LysoPE-poly | 1      | 1.32E-12 | 5.41E-10 |
| CB LysoPC-sat  | CB LysoPC-mono | 1      | 1.31E-09 | 1.80E-07 |
| CB LysoPC-sat  | CB LysoPE-sat  | 1      | 9.43E-09 | 8.59E-07 |
| CB PC-mono     | CB PE-mono     | 1      | 6.68E-10 | 1.10E-07 |
| CB PC-poly     | CB PE-poly     | 1      | 1.87E-06 | 9.03E-05 |
| CB PC-poly     | CB TG-mono     | 0.608  | 0.00262  | 0.0564   |
| CB PC-poly     | CB PLPC-poly   | 0.523  | 0.00416  | 0.081    |
| CB PC-sat      | CB PLPC-sat    | 1      | 4.99E-08 | 3.41E-06 |
| CB PE-mono     | CB PE-poly     | 1      | 0.000953 | 0.0244   |
| CB PE-sat      | CB PE-poly     | 1      | 1.25E-07 | 6.81E-06 |
| CB PE-sat      | CB PLPE-mono   | 1      | 0.000136 | 0.00414  |
| CB PG-sat      | CB PLPC-sat    | 0.519  | 0.000555 | 0.0147   |
| CB PG-sat      | CB PI-poly     | 0.344  | 0.0027   | 0.0568   |
| CB PI-mono     | CB PI-poly     | 1      | 3.21E-11 | 8.77E-09 |
| CB PI-sat      | CB PI-mono     | 1      | 1.53E-06 | 7.83E-05 |
| CB PI-sat      | CB PLPE-mono   | 0.84   | 0.0034   | 0.0697   |
| CB PLPC-mono   | CB PLPC-poly   | 0.619  | 0.00206  | 0.0482   |
| CB PLPC-sat    | CB PLPC-mono   | 1      | 8.87E-08 | 5.20E-06 |
| CB PLPE-mono   | CB PLPE-poly   | 1      | 2.86E-05 | 0.000977 |
| CB PLPE-sat    | CB PLPE-poly   | 1      | 4.86E-09 | 5.69E-07 |

|              |              |       |          |          |
|--------------|--------------|-------|----------|----------|
| CB PLPE-sat  | CB PLPE-mono | 0.64  | 0.0037   | 0.074    |
| CB SM-mono   | CB SM-poly   | 0.939 | 2.93E-08 | 2.40E-06 |
| CB SM-sat    | CB SM-mono   | 1     | 4.45E-08 | 3.32E-06 |
| CB TG-mono   | CB TG-poly   | 0.524 | 0.00183  | 0.0455   |
| CB TG-sat    | CB TG-mono   | 1     | 9.81E-06 | 0.00035  |
| M1-GlcCer    | M3-GlcCer    | 0.701 | 1.99E-06 | 0.000165 |
| M1-PE-poly   | M3-PE-poly   | 0.603 | 3.30E-05 | 0.00192  |
| M1-SM-poly   | M3-SM-poly   | 0.537 | 0.000114 | 0.00612  |
| M1-PE-mono   | M3-PE-mono   | 0.72  | 0.000207 | 0.0107   |
| M1-PI-mono   | M3-PI-mono   | 0.62  | 0.000339 | 0.0163   |
| M1-PLPE-poly | M3-PLPE-poly | 0.622 | 0.00033  | 0.0163   |
| M1-PC-poly   | M3-PC-poly   | 0.545 | 0.0019   | 0.0734   |
| M1-SM-sat    | M3-SM-sat    | 0.577 | 0.0024   | 0.0896   |

**Supplementary Table S4. Association between maternal baseline BMI with lipid groups.** Regression models estimated the linear relationship between maternal baseline BMI and M1, M3, and CB lipid groups, adjusting for sex, parity, maternal age, and gestational age. Significance denoted by unadjusted p-value ( $\alpha=0.05$ , highlighted in red) and an FDR adjusted p-value ( $\alpha=0.10$ , highlighted in green).

| Lipid group | Maternal First Trimester |           |                    |               | Maternal term    |           |                    |               | Cord blood       |           |                    |        |
|-------------|--------------------------|-----------|--------------------|---------------|------------------|-----------|--------------------|---------------|------------------|-----------|--------------------|--------|
|             | Beta Coefficient         | Std Error | unadjusted p-value | FDR           | Beta Coefficient | Std Error | unadjusted p-value | FDR           | Beta Coefficient | Std Error | unadjusted p-value | FDR    |
| AC          | 0.0003                   | 0.0165    | 0.9833             | 0.9876        | -0.0045          | 0.0163    | 0.7822             | 0.8223        | 0.0205           | 0.0158    | 0.1941             | 0.9162 |
| CE          | 0.0374                   | 0.0158    | <b>0.0180</b>      | 0.1230        | -0.0353          | 0.0162    | <b>0.0292</b>      | 0.1332        | -0.0428          | 0.0153    | <b>0.0052</b>      | 0.1854 |
| CE-poly     | 0.0003                   | 0.0165    | 0.9836             | 0.9876        | -0.0143          | 0.0162    | 0.3790             | 0.4383        | 0.0062           | 0.0153    | 0.6843             | 0.9162 |
| CER-sat     | 0.0217                   | 0.0158    | 0.1698             | 0.3853        | -0.0291          | 0.0159    | 0.0679             | 0.1710        | -0.0152          | 0.0160    | 0.3408             | 0.9162 |
| CER-mono    | -0.0074                  | 0.0164    | 0.6512             | 0.8613        | -0.0292          | 0.0155    | 0.0601             | 0.1710        | -0.0026          | 0.0163    | 0.8715             | 0.9162 |
| CER-poly    | -0.0086                  | 0.0162    | 0.5961             | 0.8146        | -0.0001          | 0.0161    | 0.9955             | 0.9955        | -0.0088          | 0.0163    | 0.5906             | 0.9162 |
| DG-sat      | 0.0089                   | 0.0162    | 0.5810             | 0.8146        | -0.0103          | 0.0163    | 0.5271             | 0.5841        | 0.0096           | 0.0153    | 0.5303             | 0.9162 |
| DG-mono     | 0.0276                   | 0.0158    | 0.0814             | 0.2225        | -0.0143          | 0.0164    | 0.3848             | 0.4383        | 0.0046           | 0.0161    | 0.7723             | 0.9162 |
| DG-poly     | 0.0316                   | 0.0157    | <b>0.0437</b>      | 0.1792        | -0.0083          | 0.0164    | 0.6140             | 0.6624        | 0.0067           | 0.0160    | 0.6767             | 0.9162 |
| FFA-sat     | -0.0013                  | 0.0161    | 0.9382             | 0.9876        | 0.0006           | 0.0164    | 0.9713             | 0.9955        | -0.0059          | 0.0157    | 0.7061             | 0.9162 |
| FFA-mono    | 0.0037                   | 0.0164    | 0.8212             | 0.9876        | -0.0266          | 0.0161    | 0.0975             | 0.1980        | -0.0102          | 0.0157    | 0.5141             | 0.9162 |
| FFA-poly    | 0.0212                   | 0.0165    | 0.1988             | 0.3882        | -0.0142          | 0.0163    | 0.3826             | 0.4383        | 0.0054           | 0.0159    | 0.7333             | 0.9162 |
| GlcCer      | -0.0340                  | 0.0163    | <b>0.0375</b>      | 0.1766        | -0.0257          | 0.0161    | 0.1092             | 0.1980        | 0.0091           | 0.0164    | 0.5790             | 0.9162 |
| LysoPC-sat  | -0.0238                  | 0.0163    | 0.1446             | 0.3706        | -0.0285          | 0.0158    | 0.0709             | 0.1710        | 0.0188           | 0.0162    | 0.2483             | 0.9162 |
| LysoPC-mono | -0.0278                  | 0.0160    | 0.0814             | 0.2225        | -0.0264          | 0.0159    | 0.0961             | 0.1980        | 0.0096           | 0.0164    | 0.5604             | 0.9162 |
| LysoPC-poly | -0.0035                  | 0.0156    | 0.8211             | 0.9876        | -0.0205          | 0.0161    | 0.2019             | 0.2855        | 0.0102           | 0.0159    | 0.5205             | 0.9162 |
| LysoPE-sat  | -0.0294                  | 0.0156    | 0.0595             | 0.1878        | -0.0165          | 0.0163    | 0.3118             | 0.3873        | 0.0185           | 0.0162    | 0.2545             | 0.9162 |
| LysoPE-poly | -0.0111                  | 0.0151    | 0.4593             | 0.6975        | -0.0297          | 0.0162    | 0.0664             | 0.1710        | 0.0066           | 0.0156    | 0.6738             | 0.9162 |
| PC-sat      | -0.0162                  | 0.0161    | 0.3160             | 0.5632        | -0.0551          | 0.0154    | <b>0.0003</b>      | <b>0.0046</b> | -0.0033          | 0.0168    | 0.8431             | 0.9162 |
| PC-mono     | -0.0003                  | 0.0165    | 0.9876             | 0.9876        | -0.0479          | 0.0160    | <b>0.0028</b>      | <b>0.0222</b> | -0.0078          | 0.0167    | 0.6396             | 0.9162 |
| PC-poly     | -0.0328                  | 0.0159    | <b>0.0388</b>      | 0.1766        | -0.0580          | 0.0152    | <b>0.0001</b>      | <b>0.0042</b> | 0.0182           | 0.0165    | 0.2699             | 0.9162 |
| PE-sat      | -0.0158                  | 0.0163    | 0.3319             | 0.5670        | -0.0260          | 0.0162    | 0.1100             | 0.1980        | 0.0041           | 0.0161    | 0.7975             | 0.9162 |
| PE-mono     | -0.0123                  | 0.0165    | 0.4559             | 0.6975        | -0.0257          | 0.0166    | 0.1215             | 0.1980        | 0.0010           | 0.0165    | 0.9539             | 0.9539 |
| PE-poly     | -0.0092                  | 0.0163    | 0.5701             | 0.8146        | -0.0286          | 0.0164    | 0.0815             | 0.1856        | 0.0195           | 0.0163    | 0.2313             | 0.9162 |
| PG-sat      | 0.0132                   | 0.0155    | 0.3923             | 0.6433        | -0.0240          | 0.0162    | 0.1389             | 0.2034        | 0.0322           | 0.0162    | <b>0.0460</b>      | 0.6293 |
| PG-mono     | -0.0014                  | 0.0162    | 0.9304             | 0.9876        | -0.0415          | 0.0160    | <b>0.0095</b>      | <b>0.0488</b> | 0.0043           | 0.0157    | 0.7845             | 0.9162 |
| PI-sat      | 0.0061                   | 0.0162    | 0.7052             | 0.9036        | -0.0252          | 0.0164    | 0.1255             | 0.1980        | 0.0031           | 0.0166    | 0.8524             | 0.9162 |
| PI-mono     | 0.0211                   | 0.0162    | 0.1926             | 0.3882        | -0.0319          | 0.0162    | <b>0.0489</b>      | 0.1672        | 0.0064           | 0.0162    | 0.6946             | 0.9162 |
| PI-poly     | 0.0223                   | 0.0160    | 0.1634             | 0.3853        | -0.0331          | 0.0162    | <b>0.0406</b>      | 0.1627        | 0.0172           | 0.0156    | 0.2700             | 0.9162 |
| PLPC-sat    | -0.0390                  | 0.0162    | <b>0.0164</b>      | 0.1230        | -0.0506          | 0.0155    | <b>0.0011</b>      | <b>0.0111</b> | 0.0150           | 0.0159    | 0.3467             | 0.9162 |
| PLPC-mono   | -0.0370                  | 0.0162    | <b>0.0223</b>      | 0.1303        | -0.0193          | 0.0167    | 0.2459             | 0.3253        | 0.0212           | 0.0161    | 0.1882             | 0.9162 |
| PLPC-poly   | -0.0312                  | 0.0162    | 0.0542             | 0.1878        | -0.0175          | 0.0161    | 0.2758             | 0.3534        | 0.0049           | 0.0165    | 0.7692             | 0.9162 |
| PLPE-sat    | -0.0302                  | 0.0159    | 0.0573             | 0.1878        | -0.0451          | 0.0158    | <b>0.0042</b>      | <b>0.0247</b> | 0.0218           | 0.0152    | 0.1520             | 0.9162 |
| PLPE-mono   | -0.0577                  | 0.0153    | <b>0.0002</b>      | <b>0.0023</b> | -0.0583          | 0.0157    | <b>0.0002</b>      | <b>0.0042</b> | -0.0046          | 0.0161    | 0.7767             | 0.9162 |
| PLPE-poly   | -0.0379                  | 0.0157    | <b>0.0157</b>      | 0.1230        | -0.0310          | 0.0161    | 0.0550             | 0.1710        | 0.0089           | 0.0163    | 0.5844             | 0.9162 |
| SM-sat      | 0.0182                   | 0.0164    | 0.2670             | 0.4976        | -0.0199          | 0.0162    | 0.2176             | 0.2974        | -0.0049          | 0.0167    | 0.7681             | 0.9162 |
| SM-mono     | 0.0678                   | 0.0153    | <b>0.0000</b>      | <b>0.0002</b> | 0.0318           | 0.0158    | <b>0.0436</b>      | 0.1627        | 0.0190           | 0.0162    | 0.2394             | 0.9162 |
| SM-poly     | 0.0743                   | 0.0142    | <b>0.0000</b>      | <b>0.0000</b> | 0.0460           | 0.0156    | <b>0.0032</b>      | <b>0.0222</b> | 0.0404           | 0.0155    | <b>0.0090</b>      | 0.1854 |
| TG-sat      | -0.0022                  | 0.0165    | 0.8944             | 0.9876        | -0.0258          | 0.0163    | 0.1137             | 0.1980        | 0.0034           | 0.0160    | 0.8290             | 0.9162 |
| TG-mono     | -0.0028                  | 0.0162    | 0.8608             | 0.9876        | -0.0256          | 0.0165    | 0.1202             | 0.1980        | 0.0091           | 0.0152    | 0.5497             | 0.9162 |
| TG-poly     | 0.0215                   | 0.0160    | 0.1786             | 0.3853        | -0.0240          | 0.0160    | 0.1331             | 0.2021        | 0.0016           | 0.0163    | 0.9207             | 0.9437 |

**Supplementary Table S5. Association between maternal gestational weight gain with lipid groups.** Regression models estimated the linear relationship between maternal GWG (kg) and M1, M3, and CB lipid groups, adjusting for sex, parity, maternal age, and gestational age. Significance denoted by unadjusted p-value ( $\alpha=0.05$ , highlighted in red) and an FDR adjusted p-value ( $\alpha=0.10$ , highlighted in green).

| Lipid group | Maternal First Trimester |           |                    |        | Maternal term    |           |                    |        | Cord blood       |           |                    |        |
|-------------|--------------------------|-----------|--------------------|--------|------------------|-----------|--------------------|--------|------------------|-----------|--------------------|--------|
|             | Beta Coefficient         | Std Error | unadjusted p-value | FDR    | Beta Coefficient | Std Error | unadjusted p-value | FDR    | Beta Coefficient | Std Error | unadjusted p-value | FDR    |
| AC          | 0.0253                   | 0.0188    | 0.1781             | 0.5438 | 0.0077           | 0.0185    | 0.6788             | 0.9082 | 0.0097           | 0.0182    | 0.5949             | 0.9971 |
| CE          | -0.0034                  | 0.0186    | 0.8541             | 0.8979 | 0.0324           | 0.0185    | 0.0805             | 0.2750 | 0.0170           | 0.0180    | 0.3442             | 0.9971 |
| CE-poly     | 0.0041                   | 0.0190    | 0.8306             | 0.8962 | 0.0178           | 0.0185    | 0.3357             | 0.5984 | 0.0099           | 0.0178    | 0.5770             | 0.9971 |
| CER-sat     | 0.0145                   | 0.0185    | 0.4340             | 0.7258 | 0.0409           | 0.0183    | 0.0251             | 0.1078 | 0.0332           | 0.0180    | 0.0655             | 0.9971 |
| CER-mono    | 0.0232                   | 0.0186    | 0.2122             | 0.5438 | 0.0287           | 0.0185    | 0.1219             | 0.3125 | 0.0006           | 0.0186    | 0.9756             | 0.9971 |
| CER-poly    | -0.0052                  | 0.0185    | 0.7774             | 0.8704 | -0.0166          | 0.0188    | 0.3793             | 0.6479 | 0.0020           | 0.0185    | 0.9149             | 0.9971 |
| DG-sat      | 0.0187                   | 0.0183    | 0.3086             | 0.6468 | 0.0194           | 0.0185    | 0.2940             | 0.5739 | 0.0202           | 0.0174    | 0.2465             | 0.9971 |
| DG-mono     | -0.0159                  | 0.0182    | 0.3826             | 0.7155 | -0.0036          | 0.0187    | 0.8476             | 0.9676 | 0.0057           | 0.0183    | 0.7555             | 0.9971 |
| DG-poly     | -0.0232                  | 0.0181    | 0.1995             | 0.5438 | 0.0029           | 0.0188    | 0.8756             | 0.9676 | 0.0165           | 0.0183    | 0.3690             | 0.9971 |
| FFA-sat     | -0.0016                  | 0.0189    | 0.9337             | 0.9407 | -0.0002          | 0.0186    | 0.9904             | 0.9904 | 0.0126           | 0.0185    | 0.4946             | 0.9971 |
| FFA-mono    | -0.0093                  | 0.0189    | 0.6230             | 0.8704 | -0.0203          | 0.0185    | 0.2743             | 0.5624 | -0.0126          | 0.0180    | 0.4833             | 0.9971 |
| FFA-poly    | -0.0076                  | 0.0192    | 0.6902             | 0.8704 | -0.0095          | 0.0188    | 0.6120             | 0.8961 | -0.0013          | 0.0182    | 0.9445             | 0.9971 |
| GlcCer      | -0.0065                  | 0.0190    | 0.7339             | 0.8704 | -0.0182          | 0.0185    | 0.3264             | 0.5984 | 0.0007           | 0.0187    | 0.9685             | 0.9971 |
| LysoPC-sat  | 0.0394                   | 0.0184    | 0.0325             | 0.2606 | 0.0478           | 0.0179    | 0.0075             | 0.0439 | 0.0175           | 0.0188    | 0.3532             | 0.9971 |
| LysoPC-mono | 0.0284                   | 0.0184    | 0.1224             | 0.4563 | 0.0381           | 0.0179    | 0.0336             | 0.1252 | -0.0048          | 0.0191    | 0.8034             | 0.9971 |
| LysoPC-poly | 0.0416                   | 0.0181    | 0.0216             | 0.2606 | 0.0566           | 0.0177    | 0.0014             | 0.0157 | 0.0081           | 0.0184    | 0.6593             | 0.9971 |
| LysoPE-sat  | 0.0232                   | 0.0181    | 0.1986             | 0.5438 | 0.0535           | 0.0180    | 0.0029             | 0.0238 | 0.0169           | 0.0190    | 0.3739             | 0.9971 |
| LysoPE-poly | 0.0370                   | 0.0179    | 0.0393             | 0.2606 | 0.0680           | 0.0177    | 0.0001             | 0.0024 | 0.0112           | 0.0179    | 0.5297             | 0.9971 |
| PC-sat      | 0.0377                   | 0.0180    | 0.0368             | 0.2606 | 0.0510           | 0.0181    | 0.0048             | 0.0328 | -0.0029          | 0.0191    | 0.8810             | 0.9971 |
| PC-mono     | 0.0348                   | 0.0185    | 0.0606             | 0.3108 | 0.0459           | 0.0185    | 0.0131             | 0.0673 | 0.0091           | 0.0190    | 0.6329             | 0.9971 |
| PC-poly     | 0.0328                   | 0.0184    | 0.0743             | 0.3383 | 0.0403           | 0.0181    | 0.0263             | 0.1078 | -0.0056          | 0.0189    | 0.7683             | 0.9971 |
| PE-sat      | 0.0212                   | 0.0185    | 0.2528             | 0.5997 | 0.0206           | 0.0188    | 0.2736             | 0.5624 | 0.0003           | 0.0184    | 0.9869             | 0.9971 |
| PE-mono     | 0.0163                   | 0.0189    | 0.3872             | 0.7155 | 0.0132           | 0.0191    | 0.4892             | 0.8023 | 0.0001           | 0.0187    | 0.9971             | 0.9971 |
| PE-poly     | 0.0076                   | 0.0186    | 0.6814             | 0.8704 | 0.0118           | 0.0189    | 0.5331             | 0.8406 | -0.0007          | 0.0187    | 0.9701             | 0.9971 |
| PG-sat      | 0.0014                   | 0.0190    | 0.9407             | 0.9407 | -0.0006          | 0.0190    | 0.9732             | 0.9904 | -0.0034          | 0.0188    | 0.8558             | 0.9971 |
| PG-mono     | -0.0185                  | 0.0184    | 0.3155             | 0.6468 | -0.0022          | 0.0188    | 0.9064             | 0.9676 | 0.0045           | 0.0179    | 0.7991             | 0.9971 |
| PI-sat      | 0.0085                   | 0.0186    | 0.6490             | 0.8704 | 0.0070           | 0.0189    | 0.7099             | 0.9082 | -0.0063          | 0.0189    | 0.7371             | 0.9971 |
| PI-mono     | -0.0069                  | 0.0186    | 0.7120             | 0.8704 | 0.0019           | 0.0188    | 0.9204             | 0.9676 | -0.0206          | 0.0186    | 0.2687             | 0.9971 |
| PI-poly     | -0.0094                  | 0.0185    | 0.6108             | 0.8704 | 0.0055           | 0.0188    | 0.7720             | 0.9310 | -0.0382          | 0.0186    | 0.0402             | 0.9971 |
| PLPC-sat    | 0.0059                   | 0.0190    | 0.7570             | 0.8704 | 0.0064           | 0.0186    | 0.7310             | 0.9082 | -0.0058          | 0.0182    | 0.7510             | 0.9971 |
| PLPC-mono   | 0.0053                   | 0.0189    | 0.7791             | 0.8704 | 0.0098           | 0.0190    | 0.6051             | 0.8961 | -0.0195          | 0.0185    | 0.2920             | 0.9971 |
| PLPC-poly   | 0.0144                   | 0.0188    | 0.4426             | 0.7258 | 0.0020           | 0.0184    | 0.9129             | 0.9676 | 0.0042           | 0.0191    | 0.8244             | 0.9971 |
| PLPE-sat    | 0.0273                   | 0.0183    | 0.1350             | 0.4611 | 0.0307           | 0.0189    | 0.1040             | 0.3125 | -0.0044          | 0.0178    | 0.8052             | 0.9971 |
| PLPE-mono   | 0.0368                   | 0.0183    | 0.0445             | 0.2606 | 0.0248           | 0.0190    | 0.1916             | 0.4364 | 0.0052           | 0.0184    | 0.7769             | 0.9971 |
| PLPE-poly   | 0.0303                   | 0.0182    | 0.0962             | 0.3943 | 0.0258           | 0.0185    | 0.1625             | 0.3920 | 0.0029           | 0.0188    | 0.8789             | 0.9971 |
| SM-sat      | 0.0158                   | 0.0188    | 0.4014             | 0.7155 | 0.0086           | 0.0186    | 0.6450             | 0.9082 | 0.0081           | 0.0190    | 0.6720             | 0.9971 |
| SM-mono     | -0.0469                  | 0.0185    | 0.0113             | 0.2325 | -0.0558          | 0.0176    | 0.0015             | 0.0157 | -0.0073          | 0.0186    | 0.6961             | 0.9971 |
| SM-poly     | -0.0578                  | 0.0178    | 0.0011             | 0.0459 | -0.0786          | 0.0172    | 0.0000             | 0.0002 | -0.0209          | 0.0184    | 0.2550             | 0.9971 |
| TG-sat      | 0.0208                   | 0.0186    | 0.2633             | 0.5997 | 0.0297           | 0.0187    | 0.1122             | 0.3125 | 0.0036           | 0.0181    | 0.8423             | 0.9971 |
| TG-mono     | 0.0117                   | 0.0186    | 0.5317             | 0.8385 | -0.0067          | 0.0191    | 0.7263             | 0.9082 | 0.0029           | 0.0174    | 0.8658             | 0.9971 |
| TG-poly     | 0.0050                   | 0.0184    | 0.7854             | 0.8704 | 0.0288           | 0.0183    | 0.1158             | 0.3125 | 0.0220           | 0.0185    | 0.2340             | 0.9971 |

**Supplementary Table S6. Association between lipid groups and birth weight, stratified by sex.** Regression models estimated the linear relationship between M1, M3, and CB lipid groups and Fenton birth weight z-score, adjusting for sex, parity, maternal age, gestational age, maternal baseline BMI, and maternal GWG. Sex stratified models were run. Significance denoted by unadjusted p-value ( $\alpha=0.05$ , highlighted in red) and an FDR adjusted p-value ( $\alpha=0.10$ , highlighted in green).

| Lipid Group                     | All              |           |                    |        | Males            |           |                    |               | Females          |           |                    |               |
|---------------------------------|------------------|-----------|--------------------|--------|------------------|-----------|--------------------|---------------|------------------|-----------|--------------------|---------------|
|                                 | Beta Coefficient | Std Error | unadjusted p-value | FDR    | Beta Coefficient | Std Error | unadjusted p-value | FDR           | Beta Coefficient | Std Error | unadjusted p-value | FDR           |
| <i>Maternal First Trimester</i> |                  |           |                    |        |                  |           |                    |               |                  |           |                    |               |
| AC                              | 0.0289           | 0.0766    | 0.7063             | 0.9685 | 0.1229           | 0.1121    | 0.2728             | 0.7006        | -0.0415          | 0.1037    | 0.6889             | 0.9151        |
| CE                              | -0.0365          | 0.0788    | 0.6434             | 0.9685 | -0.1451          | 0.1187    | 0.2218             | 0.7006        | 0.0985           | 0.1073    | 0.3584             | 0.9151        |
| CE-poly                         | 0.0475           | 0.0752    | 0.5276             | 0.9685 | 0.0390           | 0.1264    | 0.7578             | 0.9138        | 0.0892           | 0.0958    | 0.3514             | 0.9151        |
| CER-sat                         | -0.0535          | 0.0791    | 0.4987             | 0.9685 | -0.0397          | 0.1107    | 0.7199             | 0.8944        | -0.0531          | 0.1162    | 0.6476             | 0.9151        |
| CER-mono                        | -0.1211          | 0.0754    | 0.1082             | 0.9685 | -0.2700          | 0.1068    | <b>0.0115</b>      | 0.1355        | 0.0685           | 0.1045    | 0.5120             | 0.9151        |
| CER-poly                        | -0.1191          | 0.0765    | 0.1196             | 0.9685 | -0.2950          | 0.1065    | <b>0.0056</b>      | 0.1150        | 0.1247           | 0.1105    | 0.2593             | 0.9151        |
| DG-sat                          | 0.0352           | 0.0775    | 0.6495             | 0.9685 | 0.0976           | 0.1014    | 0.3357             | 0.7006        | -0.0635          | 0.1338    | 0.6354             | 0.9151        |
| DG-mono                         | -0.0627          | 0.0788    | 0.4266             | 0.9685 | -0.0876          | 0.1413    | 0.5351             | 0.8286        | -0.0601          | 0.0955    | 0.5291             | 0.9151        |
| DG-poly                         | -0.1350          | 0.0784    | 0.0852             | 0.9685 | -0.2449          | 0.1372    | 0.0742             | 0.4344        | -0.0850          | 0.0947    | 0.3694             | 0.9151        |
| FFA-sat                         | 0.0889           | 0.0766    | 0.2454             | 0.9685 | 0.2884           | 0.1255    | <b>0.0216</b>      | 0.1772        | -0.0627          | 0.0939    | 0.5040             | 0.9151        |
| FFA-mono                        | 0.0028           | 0.0767    | 0.9704             | 0.9727 | 0.1051           | 0.1035    | 0.3100             | 0.7006        | -0.1402          | 0.1123    | 0.2118             | 0.9151        |
| FFA-poly                        | -0.0212          | 0.0760    | 0.7799             | 0.9685 | 0.0026           | 0.1067    | 0.9808             | 0.9898        | -0.0682          | 0.1084    | 0.5291             | 0.9151        |
| GlcCer                          | 0.0177           | 0.0766    | 0.8172             | 0.9685 | -0.1076          | 0.1158    | 0.3526             | 0.7006        | 0.1212           | 0.1012    | 0.2308             | 0.9151        |
| LysoPC-sat                      | -0.0945          | 0.0765    | 0.2170             | 0.9685 | -0.1537          | 0.1124    | 0.1715             | 0.7006        | 0.0006           | 0.1071    | 0.9955             | 0.9955        |
| LysoPC-mono                     | -0.0493          | 0.0782    | 0.5281             | 0.9685 | -0.0214          | 0.1168    | 0.8543             | 0.9533        | -0.0295          | 0.1119    | 0.7923             | 0.9151        |
| LysoPC-poly                     | -0.0246          | 0.0810    | 0.7616             | 0.9685 | 0.0655           | 0.1180    | 0.5788             | 0.8286        | -0.0704          | 0.1252    | 0.5740             | 0.9151        |
| LysoPE-sat                      | -0.0813          | 0.0794    | 0.3061             | 0.9685 | -0.0620          | 0.1154    | 0.5909             | 0.8286        | -0.0917          | 0.1241    | 0.4599             | 0.9151        |
| LysoPE-poly                     | -0.0359          | 0.0831    | 0.6658             | 0.9685 | 0.0281           | 0.1141    | 0.8054             | 0.9434        | -0.0821          | 0.1368    | 0.5482             | 0.9151        |
| PC-sat                          | -0.0427          | 0.0783    | 0.5856             | 0.9685 | -0.0684          | 0.1142    | 0.5496             | 0.8286        | 0.0513           | 0.1124    | 0.6479             | 0.9151        |
| PC-mono                         | -0.0796          | 0.0766    | 0.2987             | 0.9685 | -0.2831          | 0.1299    | <b>0.0293</b>      | 0.2005        | 0.0713           | 0.0937    | 0.4467             | 0.9151        |
| PC-poly                         | -0.0100          | 0.0791    | 0.8991             | 0.9704 | -0.0014          | 0.1122    | 0.9898             | 0.9898        | 0.0305           | 0.1151    | 0.7909             | 0.9151        |
| PE-sat                          | 0.0155           | 0.0768    | 0.8401             | 0.9685 | -0.0195          | 0.1108    | 0.8603             | 0.9533        | 0.1019           | 0.1087    | 0.3484             | 0.9151        |
| PE-mono                         | 0.0235           | 0.0754    | 0.7558             | 0.9685 | -0.1206          | 0.1222    | 0.3237             | 0.7006        | 0.1458           | 0.0922    | 0.1137             | 0.9151        |
| PE-poly                         | 0.0326           | 0.0765    | 0.6706             | 0.9685 | -0.0556          | 0.1045    | 0.5945             | 0.8286        | 0.1921           | 0.1118    | 0.0856             | 0.9151        |
| PG-sat                          | -0.0331          | 0.0804    | 0.6801             | 0.9685 | -0.0564          | 0.1094    | 0.6063             | 0.8286        | -0.0101          | 0.1234    | 0.9347             | 0.9826        |
| PG-mono                         | -0.0564          | 0.0769    | 0.4636             | 0.9685 | -0.1859          | 0.1083    | 0.0859             | 0.4404        | 0.1220           | 0.1194    | 0.3070             | 0.9151        |
| PI-sat                          | -0.0097          | 0.0771    | 0.8994             | 0.9704 | 0.1315           | 0.1545    | 0.3947             | 0.7355        | -0.0602          | 0.0855    | 0.4816             | 0.9151        |
| PI-mono                         | -0.0536          | 0.0767    | 0.4846             | 0.9685 | -0.2608          | 0.2181    | 0.2319             | 0.7006        | -0.0322          | 0.0792    | 0.6847             | 0.9151        |
| PI-poly                         | -0.0537          | 0.0774    | 0.4874             | 0.9685 | -0.1358          | 0.1480    | 0.3588             | 0.7006        | -0.0274          | 0.0931    | 0.7681             | 0.9151        |
| PLPC-sat                        | 0.0026           | 0.0768    | 0.9727             | 0.9727 | -0.0055          | 0.1219    | 0.9639             | 0.9898        | 0.0424           | 0.0994    | 0.6695             | 0.9151        |
| PLPC-mono                       | -0.0145          | 0.0770    | 0.8503             | 0.9685 | -0.0111          | 0.1307    | 0.9323             | 0.9898        | 0.0090           | 0.0957    | 0.9251             | 0.9826        |
| PLPC-poly                       | -0.0033          | 0.0766    | 0.9656             | 0.9727 | 0.0900           | 0.1308    | 0.4916             | 0.8286        | -0.0285          | 0.0937    | 0.7611             | 0.9151        |
| PLPE-sat                        | -0.0566          | 0.0785    | 0.4709             | 0.9685 | -0.0405          | 0.1124    | 0.7183             | 0.8944        | -0.0344          | 0.1216    | 0.7773             | 0.9151        |
| PLPE-mono                       | -0.0587          | 0.0815    | 0.4715             | 0.9685 | -0.0571          | 0.1249    | 0.6475             | 0.8564        | -0.0197          | 0.1119    | 0.8605             | 0.9535        |
| PLPE-poly                       | 0.0171           | 0.0798    | 0.8304             | 0.9685 | 0.1405           | 0.1261    | 0.2655             | 0.7006        | -0.0272          | 0.1092    | 0.8035             | 0.9151        |
| SM-sat                          | -0.1225          | 0.0761    | 0.1075             | 0.9685 | -0.3660          | 0.1141    | <b>0.0013</b>      | <b>0.0549</b> | 0.0947           | 0.1016    | 0.3511             | 0.9151        |
| SM-mono                         | -0.0938          | 0.0817    | 0.2510             | 0.9685 | -0.3231          | 0.1304    | <b>0.0132</b>      | 0.1355        | 0.0910           | 0.1035    | 0.3792             | 0.9151        |
| SM-poly                         | 0.0269           | 0.0889    | 0.7625             | 0.9685 | -0.1422          | 0.1483    | 0.3379             | 0.7006        | 0.1270           | 0.1090    | 0.2437             | 0.9151        |
| TG-sat                          | 0.0456           | 0.0760    | 0.5483             | 0.9685 | 0.1069           | 0.0998    | 0.2839             | 0.7006        | 0.0043           | 0.1319    | 0.9741             | 0.9955        |
| TG-mono                         | -0.1332          | 0.0758    | 0.0789             | 0.9685 | -0.2099          | 0.1484    | 0.1572             | 0.7006        | -0.1062          | 0.0898    | 0.2366             | 0.9151        |
| TG-poly                         | -0.0851          | 0.0776    | <b>0.2727</b>      | 0.9685 | -0.0608          | 0.1143    | 0.5950             | 0.8286        | -0.0948          | 0.1059    | 0.3707             | 0.9151        |
| <i>Maternal Term</i>            |                  |           |                    |        |                  |           |                    |               |                  |           |                    |               |
| AC                              | 0.1059           | 0.0758    | 0.1622             | 0.4122 | 0.2052           | 0.1050    | 0.0507             | 0.7164        | 0.0182           | 0.1106    | 0.8690             | 0.9733        |
| CE                              | -0.0112          | 0.0771    | 0.8849             | 0.9743 | 0.0150           | 0.1167    | 0.8980             | 0.9929        | 0.0242           | 0.1155    | 0.8338             | 0.9733        |
| CE-poly                         | -0.1147          | 0.0760    | 0.1312             | 0.4046 | 0.0850           | 0.1234    | 0.4912             | 0.8391        | -0.3029          | 0.1092    | <b>0.0055</b>      | <b>0.0757</b> |
| CER-sat                         | -0.0248          | 0.0798    | 0.7561             | 0.9394 | -0.0011          | 0.1215    | 0.9929             | 0.9929        | -0.0133          | 0.1080    | 0.9021             | 0.9733        |
| CER-mono                        | 0.0498           | 0.0811    | 0.5388             | 0.8574 | -0.0117          | 0.1235    | 0.9244             | 0.9929        | 0.0944           | 0.1043    | 0.3653             | 0.7324        |
| CER-poly                        | 0.1323           | 0.0800    | 0.0982             | 0.3967 | 0.1008           | 0.1182    | 0.3939             | 0.8253        | 0.1724           | 0.1057    | 0.1030             | 0.3440        |
| DG-sat                          | 0.1475           | 0.0751    | <b>0.0494</b>      | 0.3377 | 0.1260           | 0.0993    | 0.2046             | 0.7164        | 0.1842           | 0.1231    | 0.1346             | 0.3943        |
| DG-mono                         | 0.1146           | 0.0750    | 0.1265             | 0.4046 | 0.0898           | 0.1223    | 0.4630             | 0.8253        | 0.1126           | 0.1019    | 0.2692             | 0.6131        |
| DG-poly                         | 0.0109           | 0.0756    | 0.8854             | 0.9743 | 0.0291           | 0.1266    | 0.8179             | 0.9929        | -0.0449          | 0.0977    | 0.6456             | 0.9127        |
| FFA-sat                         | -0.0721          | 0.0758    | 0.3419             | 0.7009 | -0.0732          | 0.1575    | 0.6420             | 0.9749        | -0.0609          | 0.0838    | 0.4675             | 0.7966        |
| FFA-mono                        | 0.0503           | 0.0784    | 0.5214             | 0.8574 | 0.0575           | 0.1134    | 0.6124             | 0.9657        | 0.0508           | 0.1086    | 0.6396             | 0.9127        |
| FFA-poly                        | -0.0107          | 0.0767    | 0.8893             | 0.9743 | -0.0199          | 0.1169    | 0.8647             | 0.9929        | -0.0022          | 0.1025    | 0.9832             | 0.9832        |
| GlcCer                          | 0.1437           | 0.0773    | 0.0629             | 0.3687 | 0.0376           | 0.1310    | 0.7740             | 0.9929        | 0.2379           | 0.0950    | <b>0.0123</b>      | 0.1010        |
| LysoPC-sat                      | 0.1123           | 0.0793    | 0.1567             | 0.4122 | 0.1065           | 0.0986    | 0.2799             | 0.7267        | 0.1273           | 0.1436    | 0.3752             | 0.7324        |
| LysoPC-mono                     | 0.1262           | 0.0782    | 0.1064             | 0.3967 | 0.1494           | 0.0940    | 0.1122             | 0.7164        | 0.0753           | 0.1538    | 0.6242             | 0.9127        |
| LysoPC-poly                     | 0.0705           | 0.0800    | 0.3781             | 0.7330 | 0.1454           | 0.0958    | 0.1291             | 0.7164        | -0.1060          | 0.1520    | 0.4858             | 0.7966        |
| LysoPE-sat                      | 0.1735           | 0.0770    | <b>0.0244</b>      | 0.2497 | 0.1305           | 0.1048    | 0.2134             | 0.7164        | 0.2265           | 0.1148    | <b>0.0485</b>      | 0.2810        |
| LysoPE-poly                     | -0.1094          | 0.0799    | 0.1709             | 0.4122 | -0.1774          | 0.1215    | 0.1444             | 0.7164        | -0.0566          | 0.1074    | 0.5984             | 0.9127        |
| PC-sat                          | 0.0347           | 0.0815    | 0.6702             | 0.9159 | -0.0123          | 0.1368    | 0.9284             | 0.9929        | 0.0986           | 0.1011    | 0.3295             | 0.7111        |
| PC-mono                         | -0.0186          | 0.0783    | 0.8126             | 0.9743 | -0.1345          | 0.1301    | 0.3013             | 0.7267        | 0.0813           | 0.0999    | 0.4159             | 0.7435        |
| PC-poly                         | 0.0314           | 0.0825    | 0.7038             | 0.9308 | 0.0955           | 0.1115    | 0.3917             | 0.8253        | -0.0446          | 0.1262    | 0.7239             | 0.9733        |
| PE-sat                          | 0.0410           | 0.0765    | 0.5919             | 0.8667 | -0.0872          | 0.1132    | 0.4413             | 0.8253        | 0.2003           | 0.1072    | 0.0617             | 0.2810        |
| PE-mono                         | 0.0360           | 0.0751    | 0.6319             | 0.8934 | -0.1878          | 0.1118    | 0.0931             | 0.7164        | 0.2453           | 0.0966    | <b>0.0111</b>      | 0.1010        |
| PE-poly                         | 0.0789           | 0.0753    | 0.2949             | 0.6365 | -0.0032          | 0.1038    | 0.9758             | 0.9929        | 0.1931           | 0.1139    | 0.0900             | 0.3354        |
| PG-sat                          | 0.0831           | 0.0768    | 0.2792             | 0.6360 | 0.0246           | 0.1190    | 0.8362             | 0.9929        | 0.0931           | 0.1147    | 0.4171             | 0.7435        |
| PG-mono                         | 0.0493           | 0.0781    | 0.5281             | 0.8574 | -0.1704          | 0.1254    | 0.1742             | 0.7164        | 0.1812           | 0.0963    | 0.0600             | 0.2810        |
| PI-sat                          | 0.0261           | 0.0756    | 0.7298             | 0.9350 | 0.0874           | 0.1174    | 0.4566             | 0.8253        | -0.0236          | 0.1190    | 0.8425             | 0.9733        |
| PI-mono                         | -0.0057          | 0.0770    | 0.9407             | 0.9802 | -0.0491          | 0.1180    | 0.6772             | 0.9916        | 0.0048           | 0.1075    | 0.9645             | 0.9832        |
| PI-poly                         | 0.0467           | 0.0770    | 0.5437             | 0.8574 | 0.1022           | 0.1281    | 0.4247             | 0.8253        | -0.0034          | 0.0980    | 0.9722             | 0.9832        |
| PLPC-sat                        | 0.1943           | 0.0787    | <b>0.0135</b>      | 0.1848 | 0.2165           | 0.1129    | 0.0552             | 0.7164        | 0.1829           | 0.1142    | 0.1091             | 0.3440        |
| PLPC-mono                       | 0.1289           | 0.0736    | 0.0800             | 0.3967 | 0.1847           | 0.1234    | 0.1343             | 0.7164        | 0.1105           | 0.0974    | 0.2563             | 0.6131        |
| PLPC-poly                       | 0.1142           | 0.0770    | 0.1381             | 0.4046 | 0.2236           | 0.1098    | <b>0.0416</b>      | 0.7164        | 0.0155           | 0.1112    | 0.8893             | 0.9733        |
| PLPE-sat                        | -0.0020          | 0.0789    | 0.9802             | 0.9802 | -0.0076          | 0.1163    | 0.9482             | 0.9929        | 0.0149           | 0.1088    | 0.8908             | 0.9733        |

|                   |         |        |        |        |         |        |        |        |         |        |        |        |
|-------------------|---------|--------|--------|--------|---------|--------|--------|--------|---------|--------|--------|--------|
| PLPE-mono         | 0.0028  | 0.0795 | 0.9723 | 0.9802 | 0.0436  | 0.1231 | 0.7232 | 0.9929 | -0.0230 | 0.1035 | 0.8243 | 0.9733 |
| PLPE-poly         | 0.0428  | 0.0772 | 0.5797 | 0.8667 | 0.1379  | 0.1141 | 0.2271 | 0.7164 | -0.0222 | 0.1094 | 0.8393 | 0.9733 |
| SM-sat            | 0.0657  | 0.0769 | 0.3933 | 0.7330 | -0.0144 | 0.1373 | 0.9165 | 0.9929 | 0.1355  | 0.0932 | 0.1462 | 0.3995 |
| SM-mono           | 0.2074  | 0.0789 | 0.0086 | 0.1756 | 0.1411  | 0.1326 | 0.2871 | 0.7267 | 0.3025  | 0.0974 | 0.0019 | 0.0390 |
| SM-poly           | 0.2570  | 0.0797 | 0.0013 | 0.0522 | 0.2027  | 0.1547 | 0.1902 | 0.7164 | 0.3133  | 0.0879 | 0.0004 | 0.0150 |
| TG-sat            | 0.1537  | 0.0751 | 0.0408 | 0.3342 | 0.1086  | 0.1042 | 0.2974 | 0.7267 | 0.2486  | 0.1166 | 0.0330 | 0.2256 |
| TG-mono           | 0.1265  | 0.0750 | 0.0918 | 0.3967 | 0.0310  | 0.1168 | 0.7907 | 0.9929 | 0.1921  | 0.1063 | 0.0708 | 0.2903 |
| TG-poly           | -0.0095 | 0.0781 | 0.9030 | 0.9743 | 0.0561  | 0.1015 | 0.5802 | 0.9515 | -0.1461 | 0.1250 | 0.2424 | 0.6131 |
| <i>Cord Blood</i> |         |        |        |        |         |        |        |        |         |        |        |        |
| AC                | -0.0717 | 0.0789 | 0.3635 | 0.9130 | 0.0240  | 0.1082 | 0.8241 | 0.9384 | -0.2222 | 0.1399 | 0.1123 | 0.3441 |
| CE                | 0.1076  | 0.0805 | 0.1813 | 0.6195 | 0.1017  | 0.1126 | 0.3662 | 0.7909 | 0.1824  | 0.1177 | 0.1210 | 0.3441 |
| CE-poly           | 0.1877  | 0.0811 | 0.0206 | 0.1056 | 0.3184  | 0.1177 | 0.0068 | 0.1350 | 0.0872  | 0.1076 | 0.4181 | 0.6874 |
| CER-sat           | 0.0220  | 0.0785 | 0.7796 | 0.9130 | 0.0216  | 0.1118 | 0.8469 | 0.9384 | 0.0393  | 0.1117 | 0.7252 | 0.8674 |
| CER-mono          | -0.0237 | 0.0760 | 0.7548 | 0.9130 | -0.0922 | 0.0953 | 0.3333 | 0.7909 | 0.1500  | 0.1296 | 0.2470 | 0.4823 |
| CER-poly          | 0.0257  | 0.0764 | 0.7365 | 0.9130 | -0.0253 | 0.1120 | 0.8215 | 0.9384 | 0.1062  | 0.1053 | 0.3133 | 0.5838 |
| DG-sat            | -0.0217 | 0.0826 | 0.7923 | 0.9130 | -0.0048 | 0.1120 | 0.9657 | 0.9657 | -0.0517 | 0.1259 | 0.6813 | 0.8640 |
| DG-mono           | -0.0244 | 0.0775 | 0.7530 | 0.9130 | -0.0577 | 0.1319 | 0.6618 | 0.8797 | -0.0156 | 0.0949 | 0.8693 | 0.8911 |
| DG-poly           | -0.1851 | 0.0758 | 0.0146 | 0.0852 | -0.1291 | 0.1106 | 0.2432 | 0.7671 | -0.3337 | 0.1053 | 0.0015 | 0.0313 |
| FFA-sat           | -0.1642 | 0.0781 | 0.0356 | 0.1623 | -0.1622 | 0.1110 | 0.1439 | 0.6700 | -0.1413 | 0.1137 | 0.2138 | 0.4383 |
| FFA-mono          | -0.0507 | 0.0797 | 0.5247 | 0.9130 | -0.2121 | 0.1292 | 0.1006 | 0.6700 | 0.0786  | 0.1009 | 0.4359 | 0.6874 |
| FFA-poly          | -0.1088 | 0.0778 | 0.1621 | 0.6040 | -0.1556 | 0.1098 | 0.1564 | 0.6700 | -0.0355 | 0.1170 | 0.7616 | 0.8674 |
| GlcCer            | 0.0671  | 0.0755 | 0.3742 | 0.9130 | -0.0405 | 0.1087 | 0.7093 | 0.8797 | 0.1845  | 0.1007 | 0.0669 | 0.2605 |
| LysoPC-sat        | 0.2338  | 0.0743 | 0.0017 | 0.0136 | 0.2666  | 0.1033 | 0.0099 | 0.1350 | 0.2100  | 0.1127 | 0.0623 | 0.2605 |
| LysoPC-mono       | 0.2527  | 0.0717 | 0.0004 | 0.0043 | 0.2510  | 0.1017 | 0.0136 | 0.1393 | 0.2794  | 0.1022 | 0.0063 | 0.0427 |
| LysoPC-poly       | 0.2667  | 0.0747 | 0.0004 | 0.0043 | 0.2605  | 0.1152 | 0.0237 | 0.1943 | 0.2699  | 0.0951 | 0.0045 | 0.0427 |
| LysoPE-sat        | 0.3224  | 0.0700 | 0.0000 | 0.0002 | 0.4368  | 0.1107 | 0.0001 | 0.0032 | 0.2506  | 0.0903 | 0.0055 | 0.0427 |
| LysoPE-poly       | 0.2167  | 0.0773 | 0.0050 | 0.0344 | 0.1629  | 0.1363 | 0.2319 | 0.7671 | 0.2461  | 0.0896 | 0.0060 | 0.0427 |
| PC-sat            | 0.0506  | 0.0740 | 0.4943 | 0.9130 | -0.0441 | 0.1003 | 0.6603 | 0.8797 | 0.1970  | 0.1068 | 0.0652 | 0.2605 |
| PC-mono           | 0.0125  | 0.0747 | 0.8672 | 0.9130 | -0.0817 | 0.0981 | 0.4051 | 0.7909 | 0.2050  | 0.1131 | 0.0699 | 0.2605 |
| PC-poly           | -0.0119 | 0.0761 | 0.8760 | 0.9130 | 0.0437  | 0.1131 | 0.6992 | 0.8797 | -0.0646 | 0.1017 | 0.5252 | 0.7425 |
| PE-sat            | -0.0318 | 0.0773 | 0.6809 | 0.9130 | -0.0606 | 0.0935 | 0.5172 | 0.8695 | 0.1195  | 0.1498 | 0.4250 | 0.6874 |
| PE-mono           | -0.0233 | 0.0755 | 0.7574 | 0.9130 | -0.0972 | 0.0948 | 0.3050 | 0.7909 | 0.1695  | 0.1255 | 0.1766 | 0.3863 |
| PE-poly           | -0.0296 | 0.0763 | 0.6985 | 0.9130 | -0.0499 | 0.0959 | 0.6031 | 0.8797 | 0.0334  | 0.1326 | 0.8010 | 0.8876 |
| PG-sat            | -0.0267 | 0.0770 | 0.7290 | 0.9130 | -0.1323 | 0.1380 | 0.3379 | 0.7909 | 0.0420  | 0.0895 | 0.6394 | 0.8457 |
| PG-mono           | -0.0414 | 0.0791 | 0.6006 | 0.9130 | -0.0636 | 0.0960 | 0.5075 | 0.8695 | 0.0812  | 0.1522 | 0.5935 | 0.8112 |
| PI-sat            | -0.0190 | 0.0752 | 0.8010 | 0.9130 | -0.1252 | 0.0935 | 0.1805 | 0.6728 | 0.2415  | 0.1235 | 0.0506 | 0.2605 |
| PI-mono           | -0.0123 | 0.0770 | 0.8735 | 0.9130 | -0.1064 | 0.1135 | 0.3485 | 0.7909 | 0.0789  | 0.1008 | 0.4340 | 0.6874 |
| PI-poly           | -0.0248 | 0.0809 | 0.7588 | 0.9130 | -0.1032 | 0.1461 | 0.4801 | 0.8695 | 0.0117  | 0.0963 | 0.9033 | 0.9033 |
| PLPC-sat          | -0.0086 | 0.0789 | 0.9130 | 0.9130 | -0.0553 | 0.1125 | 0.6229 | 0.8797 | 0.0753  | 0.1130 | 0.5051 | 0.7425 |
| PLPC-mono         | -0.0096 | 0.0777 | 0.9015 | 0.9130 | -0.0168 | 0.1053 | 0.8732 | 0.9422 | 0.0239  | 0.1197 | 0.8420 | 0.8911 |
| PLPC-poly         | -0.0338 | 0.0765 | 0.6592 | 0.9130 | -0.0670 | 0.1067 | 0.5302 | 0.8695 | 0.0359  | 0.1117 | 0.7477 | 0.8674 |
| PLPE-sat          | -0.0211 | 0.0817 | 0.7960 | 0.9130 | 0.0102  | 0.1116 | 0.9272 | 0.9657 | -0.0551 | 0.1408 | 0.6954 | 0.8640 |
| PLPE-mono         | 0.0136  | 0.0775 | 0.8603 | 0.9130 | -0.0399 | 0.0942 | 0.6722 | 0.8797 | 0.2320  | 0.1470 | 0.1145 | 0.3441 |
| PLPE-poly         | 0.0271  | 0.0766 | 0.7238 | 0.9130 | -0.0064 | 0.0971 | 0.9476 | 0.9657 | 0.2056  | 0.1471 | 0.1623 | 0.3863 |
| SM-sat            | 0.0423  | 0.0743 | 0.5693 | 0.9130 | -0.0354 | 0.1024 | 0.7295 | 0.8797 | 0.1677  | 0.1096 | 0.1259 | 0.3441 |
| SM-mono           | 0.0901  | 0.0765 | 0.2387 | 0.7528 | 0.0472  | 0.1333 | 0.7232 | 0.8797 | 0.1215  | 0.0902 | 0.1778 | 0.3863 |
| SM-poly           | 0.0578  | 0.0804 | 0.4723 | 0.9130 | 0.2095  | 0.1337 | 0.1173 | 0.6700 | -0.0654 | 0.1006 | 0.5155 | 0.7425 |
| TG-sat            | -0.0710 | 0.0809 | 0.3800 | 0.9130 | -0.0858 | 0.1004 | 0.3928 | 0.7909 | -0.0260 | 0.1416 | 0.8543 | 0.8911 |
| TG-mono           | -0.1168 | 0.0808 | 0.1484 | 0.6040 | -0.1131 | 0.1322 | 0.3924 | 0.7909 | -0.1329 | 0.0989 | 0.1790 | 0.3863 |
| TG-poly           | -0.2757 | 0.0717 | 0.0001 | 0.0025 | -0.1569 | 0.1126 | 0.1634 | 0.6700 | -0.4253 | 0.0836 | 0.0000 | 0.0000 |

**Supplementary Table S7. Sex-specific relationship between cord blood triglycerides and birth weight.** Regression models estimated the linear relationship between CB triglycerides and Fenton birth weight z-score, adjusting for sex, parity, maternal age, gestational age, maternal baseline BMI, and maternal GWG. Sex stratified models were run. Significance denoted by unadjusted p-value ( $\alpha=0.05$ , highlighted in red).

| Lipid   | All              |           |                    | Males            |           |                    | Females          |           |                    |
|---------|------------------|-----------|--------------------|------------------|-----------|--------------------|------------------|-----------|--------------------|
|         | Beta Coefficient | Std Error | unadjusted p-value | Beta Coefficient | Std Error | unadjusted p-value | Beta Coefficient | Std Error | unadjusted p-value |
| TG 36:0 | -0.5392          | 0.4198    | 0.1991             | -0.5072          | 0.5612    | 0.3661             | -0.405           | 0.6752    | 0.5486             |
| TG 38:0 | -0.2387          | 0.2587    | 0.3561             | -0.2743          | 0.3037    | 0.3665             | 0.1985           | 0.5801    | 0.7322             |
| TG 39:0 | 0.3291           | 0.1463    | 0.0245             | 0.4047           | 0.2036    | 0.0468             | 0.2279           | 0.2103    | 0.2785             |
| TG 40:0 | -0.1061          | 0.1189    | 0.3722             | -0.1334          | 0.1329    | 0.3156             | 0.1709           | 0.332     | 0.6068             |
| TG 40:1 | -0.0944          | 0.1497    | 0.5286             | -0.1609          | 0.183     | 0.3794             | 0.1192           | 0.2721    | 0.6613             |
| TG 41:0 | 0.0745           | 0.0864    | 0.3886             | -0.0078          | 0.1061    | 0.9410             | 0.2954           | 0.1558    | 0.0580             |
| TG 42:0 | -0.0777          | 0.0798    | 0.3299             | -0.0815          | 0.0872    | 0.3503             | 0.0567           | 0.2846    | 0.8421             |
| TG 42:1 | -0.0662          | 0.0813    | 0.4157             | -0.0875          | 0.0921    | 0.3419             | 0.093            | 0.2038    | 0.6479             |
| TG 42:2 | -0.0758          | 0.079     | 0.3373             | -0.0965          | 0.0913    | 0.2904             | 0.0392           | 0.1754    | 0.8232             |
| TG 42:3 | -0.0728          | 0.0805    | 0.3654             | -0.1147          | 0.1005    | 0.2537             | 0.0178           | 0.1455    | 0.9024             |
| TG 43:0 | 0.1034           | 0.0796    | 0.1939             | 0.0468           | 0.1119    | 0.6761             | 0.1593           | 0.1137    | 0.1611             |
| TG 44:0 | -0.0649          | 0.0777    | 0.4035             | -0.0878          | 0.0872    | 0.3141             | 0.1595           | 0.2045    | 0.4356             |
| TG 44:1 | -0.0823          | 0.0775    | 0.2880             | -0.0916          | 0.0904    | 0.3113             | -0.0175          | 0.1663    | 0.9162             |
| TG 44:2 | -0.0879          | 0.0765    | 0.2510             | -0.0957          | 0.0868    | 0.2701             | -0.012           | 0.1909    | 0.9500             |
| TG 45:0 | -0.0046          | 0.0919    | 0.9600             | -0.0353          | 0.1194    | 0.7672             | 0.0874           | 0.15      | 0.5602             |
| TG 45:1 | -0.0614          | 0.0938    | 0.5125             | -0.0628          | 0.12      | 0.6010             | -0.038           | 0.1557    | 0.8072             |
| TG 46:0 | -0.0351          | 0.0778    | 0.6514             | -0.0771          | 0.0966    | 0.4247             | 0.0864           | 0.1344    | 0.5204             |
| TG 46:1 | -0.0626          | 0.0787    | 0.4267             | -0.0851          | 0.1003    | 0.3959             | 0.0033           | 0.1295    | 0.9797             |
| TG 46:2 | -0.0983          | 0.0788    | 0.2123             | -0.1109          | 0.1042    | 0.2874             | -0.0669          | 0.1211    | 0.5807             |
| TG 46:3 | -0.124           | 0.0782    | 0.1127             | -0.1371          | 0.1023    | 0.1802             | -0.0936          | 0.1227    | 0.4456             |
| TG 47:0 | 0.0033           | 0.0948    | 0.9720             | -0.0309          | 0.1304    | 0.8125             | 0.0457           | 0.1384    | 0.7412             |
| TG 47:1 | -0.0194          | 0.0881    | 0.8256             | -0.0479          | 0.1192    | 0.6879             | 0.0508           | 0.1337    | 0.7041             |
| TG 47:2 | -0.014           | 0.0852    | 0.8693             | -0.0187          | 0.125     | 0.8810             | -0.0089          | 0.1141    | 0.9376             |
| TG 47:3 | -0.0768          | 0.0855    | 0.3686             | -0.1003          | 0.1137    | 0.3778             | -0.0294          | 0.1299    | 0.8207             |
| TG 48:0 | -0.0483          | 0.0809    | 0.5507             | -0.1017          | 0.1244    | 0.4137             | -0.0164          | 0.1044    | 0.8751             |
| TG 48:1 | -0.0797          | 0.0793    | 0.3146             | -0.1082          | 0.1157    | 0.3497             | -0.0478          | 0.1066    | 0.6540             |
| TG 48:2 | -0.0802          | 0.0805    | 0.3193             | -0.1132          | 0.1343    | 0.3991             | -0.0583          | 0.097     | 0.5477             |
| TG 48:3 | -0.1353          | 0.082     | 0.0988             | -0.1667          | 0.133     | 0.2101             | -0.1133          | 0.1004    | 0.2593             |
| TG 48:4 | -0.0939          | 0.0805    | 0.2434             | -0.1473          | 0.1195    | 0.2176             | -0.0552          | 0.1068    | 0.6052             |
| TG 49:0 | 0.0498           | 0.0796    | 0.5319             | 0.0485           | 0.1257    | 0.6994             | 0.0445           | 0.1024    | 0.6634             |
| TG 49:1 | 0.0069           | 0.0821    | 0.9329             | -0.019           | 0.1245    | 0.8789             | 0.025            | 0.1071    | 0.8151             |
| TG 49:2 | -0.0054          | 0.0839    | 0.9489             | 0.0089           | 0.1371    | 0.9481             | -0.0226          | 0.1024    | 0.8253             |
| TG 49:3 | -0.0622          | 0.084     | 0.4589             | -0.111           | 0.1408    | 0.4304             | -0.0453          | 0.1006    | 0.6529             |
| TG 50:0 | 0.0168           | 0.078     | 0.8300             | -0.034           | 0.1476    | 0.8179             | 0.0242           | 0.0886    | 0.7844             |
| TG 50:1 | -0.0915          | 0.079     | 0.2467             | -0.1373          | 0.1412    | 0.3310             | -0.0758          | 0.0918    | 0.4088             |
| TG 50:2 | -0.0993          | 0.0802    | 0.2157             | -0.1647          | 0.1561    | 0.2916             | -0.0793          | 0.0893    | 0.3745             |
| TG 50:3 | -0.1181          | 0.0818    | 0.1488             | -0.1773          | 0.1629    | 0.2764             | -0.1095          | 0.0901    | 0.2245             |
| TG 50:4 | -0.1169          | 0.0837    | 0.1625             | -0.1287          | 0.1483    | 0.3853             | -0.1252          | 0.0972    | 0.1976             |
| TG 50:5 | -0.1106          | 0.0836    | 0.1860             | -0.0996          | 0.1436    | 0.4878             | -0.1321          | 0.0986    | 0.1806             |
| TG 50:6 | -0.2335          | 0.0804    | 0.0037             | -0.2594          | 0.1342    | 0.0533             | -0.2286          | 0.096     | 0.0172             |
| TG 51:1 | -0.0481          | 0.0794    | 0.5451             | -0.1067          | 0.1458    | 0.4643             | -0.0306          | 0.0919    | 0.7392             |
| TG 51:2 | -0.0777          | 0.0827    | 0.3477             | -0.1024          | 0.1321    | 0.4383             | -0.0518          | 0.1031    | 0.6153             |
| TG 51:3 | -0.0264          | 0.0752    | 0.7256             | -0.0309          | 0.137     | 0.8214             | -0.0171          | 0.0876    | 0.8454             |
| TG 51:4 | -0.0588          | 0.0774    | 0.4472             | -0.0524          | 0.1135    | 0.6444             | -0.0761          | 0.1049    | 0.4685             |
| TG 51:5 | -0.1237          | 0.0796    | 0.1204             | -0.0468          | 0.1259    | 0.7102             | -0.2037          | 0.0995    | 0.0407             |
| TG 52:0 | -0.0992          | 0.0798    | 0.2142             | -0.1478          | 0.1311    | 0.2595             | -0.0769          | 0.098     | 0.4326             |
| TG 52:1 | -0.094           | 0.0793    | 0.2356             | -0.1491          | 0.1309    | 0.2547             | -0.0627          | 0.0975    | 0.5201             |
| TG 52:2 | -0.0802          | 0.0779    | 0.3032             | -0.2108          | 0.1416    | 0.1366             | -0.0241          | 0.0895    | 0.7880             |
| TG 52:4 | -0.0774          | 0.0771    | 0.3158             | -0.1896          | 0.1458    | 0.1933             | -0.0441          | 0.0873    | 0.6140             |
| TG 52:5 | -0.0944          | 0.081     | 0.2440             | -0.076           | 0.1444    | 0.5986             | -0.1262          | 0.0945    | 0.1819             |
| TG 52:6 | -0.2088          | 0.0827    | 0.0115             | -0.1383          | 0.1325    | 0.2966             | -0.2943          | 0.1003    | 0.0033             |
| TG 53:0 | 0.0743           | 0.0757    | 0.3268             | 0.0415           | 0.1127    | 0.7130             | 0.09             | 0.1013    | 0.3741             |
| TG 53:1 | -0.0866          | 0.0767    | 0.2588             | -0.081           | 0.1192    | 0.4964             | -0.1014          | 0.0987    | 0.3042             |
| TG 53:2 | -0.0703          | 0.0796    | 0.3770             | -0.0763          | 0.1363    | 0.5757             | -0.0541          | 0.0955    | 0.5711             |
| TG 53:3 | -0.0812          | 0.0815    | 0.3190             | -0.095           | 0.1332    | 0.4758             | -0.0757          | 0.1004    | 0.4507             |
| TG 53:4 | 0.0674           | 0.0785    | 0.3910             | 0.0754           | 0.1315    | 0.5664             | 0.0313           | 0.1004    | 0.7551             |
| TG 53:5 | -0.1369          | 0.0838    | 0.1026             | -0.0197          | 0.1269    | 0.8766             | -0.2737          | 0.1063    | 0.0100             |
| TG 54:0 | -0.0479          | 0.0806    | 0.5521             | -0.0746          | 0.1153    | 0.5175             | -0.0322          | 0.1129    | 0.7755             |



|          |         |        |        |         |        |        |         |        |        |
|----------|---------|--------|--------|---------|--------|--------|---------|--------|--------|
| TG 54:1  | -0.1108 | 0.0779 | 0.1551 | -0.1021 | 0.0947 | 0.2811 | -0.1353 | 0.1532 | 0.3769 |
| TG 54:2  | -0.1098 | 0.0787 | 0.1631 | -0.1405 | 0.1181 | 0.2341 | -0.0819 | 0.1052 | 0.4361 |
| TG 54:3  | -0.1085 | 0.0783 | 0.1660 | -0.1715 | 0.1299 | 0.1865 | -0.0737 | 0.0962 | 0.4433 |
| TG 54:4  | -0.1411 | 0.0801 | 0.0779 | -0.1596 | 0.1309 | 0.2227 | -0.1458 | 0.1003 | 0.1458 |
| TG 54:5  | -0.1469 | 0.0804 | 0.0677 | -0.0853 | 0.1345 | 0.5256 | -0.2206 | 0.098  | 0.0243 |
| TG 54:6  | -0.2063 | 0.0793 | 0.0092 | -0.1038 | 0.1274 | 0.4154 | -0.3362 | 0.0958 | 0.0005 |
| TG 54:7  | -0.3051 | 0.0758 | 0.0001 | -0.2004 | 0.118  | 0.0895 | -0.4396 | 0.0904 | 0.0000 |
| TG 54:8  | -0.2944 | 0.0741 | 0.0001 | -0.2095 | 0.1078 | 0.0518 | -0.4424 | 0.0963 | 0.0000 |
| TG 55:1  | 0.0727  | 0.0789 | 0.3572 | 0.0114  | 0.1053 | 0.9135 | 0.2014  | 0.121  | 0.0959 |
| TG 55:2  | -0.084  | 0.0778 | 0.2803 | -0.074  | 0.1072 | 0.4899 | -0.0871 | 0.1164 | 0.4541 |
| TG 55:3  | -0.1187 | 0.0811 | 0.1431 | -0.1153 | 0.1322 | 0.3832 | -0.1221 | 0.1    | 0.2221 |
| TG 56:0  | -0.067  | 0.0753 | 0.3735 | -0.06   | 0.085  | 0.4807 | -0.0857 | 0.2082 | 0.6805 |
| TG 56:1  | -0.085  | 0.0751 | 0.2578 | -0.077  | 0.0801 | 0.3366 | -0.4922 | 0.7148 | 0.4911 |
| TG 56:2  | -0.0587 | 0.0759 | 0.4393 | -0.0713 | 0.0842 | 0.3976 | 0.078   | 0.2332 | 0.7380 |
| TG 56:3  | -0.0911 | 0.0767 | 0.2349 | -0.0977 | 0.1149 | 0.3954 | -0.0864 | 0.1019 | 0.3966 |
| TG 56:4  | -0.1001 | 0.0802 | 0.2119 | 0.0598  | 0.1505 | 0.6910 | -0.1922 | 0.0899 | 0.0325 |
| TG 56:5  | -0.1171 | 0.0831 | 0.1587 | 0.1279  | 0.1379 | 0.3537 | -0.306  | 0.0944 | 0.0012 |
| TG 56:6  | -0.1544 | 0.0801 | 0.0537 | 0.0394  | 0.1284 | 0.7590 | -0.351  | 0.0943 | 0.0002 |
| TG 56:7  | -0.2822 | 0.0731 | 0.0001 | -0.1471 | 0.1133 | 0.1940 | -0.4445 | 0.0856 | 0.0000 |
| TG 56:8  | -0.2901 | 0.072  | 0.0001 | -0.1815 | 0.1028 | 0.0775 | -0.4948 | 0.0932 | 0.0000 |
| TG 56:9  | -0.291  | 0.072  | 0.0001 | -0.1944 | 0.111  | 0.0798 | -0.4349 | 0.0862 | 0.0000 |
| TG 56:10 | -0.2812 | 0.072  | 0.0001 | -0.2148 | 0.1009 | 0.0333 | -0.4285 | 0.1001 | 0.0000 |
| TG 58:1  | -0.0689 | 0.075  | 0.3581 | -0.0697 | 0.0798 | 0.3826 | 0.6542  | 0.8422 | 0.4373 |
| TG 58:2  | -0.0792 | 0.0749 | 0.2903 | -0.0727 | 0.0797 | 0.3621 | -0.6783 | 0.901  | 0.4515 |
| TG 58:3  | -0.089  | 0.075  | 0.2351 | -0.0855 | 0.0805 | 0.2881 | -0.1518 | 0.5083 | 0.7652 |
| TG 58:4  | -0.1061 | 0.0778 | 0.1729 | -0.0728 | 0.1171 | 0.5340 | -0.1616 | 0.1059 | 0.1269 |
| TG 58:5  | -0.1018 | 0.0788 | 0.1964 | 0.1502  | 0.1572 | 0.3392 | -0.23   | 0.0843 | 0.0064 |
| TG 58:6  | -0.1847 | 0.0778 | 0.0176 | -0.0145 | 0.1477 | 0.9220 | -0.2941 | 0.0837 | 0.0004 |
| TG 58:7  | -0.2101 | 0.0741 | 0.0046 | -0.0373 | 0.1254 | 0.7664 | -0.3455 | 0.0831 | 0.0000 |
| TG 58:8  | -0.2632 | 0.0709 | 0.0002 | -0.1304 | 0.118  | 0.2693 | -0.3832 | 0.0787 | 0.0000 |
| TG 58:9  | -0.2668 | 0.0713 | 0.0002 | -0.1545 | 0.1096 | 0.1587 | -0.431  | 0.0848 | 0.0000 |
| TG 58:10 | -0.231  | 0.0726 | 0.0015 | -0.1415 | 0.1075 | 0.1882 | -0.4184 | 0.0941 | 0.0000 |
| TG 58:11 | -0.2589 | 0.072  | 0.0003 | -0.2016 | 0.1019 | 0.0478 | -0.4055 | 0.1007 | 0.0001 |
| TG 60:10 | -0.1528 | 0.0763 | 0.0452 | 0.0532  | 0.1177 | 0.6512 | -0.3891 | 0.0885 | 0.0000 |
| TG 60:11 | -0.2148 | 0.0734 | 0.0034 | -0.0627 | 0.1187 | 0.5973 | -0.382  | 0.0837 | 0.0000 |
| TG 60:12 | -0.2872 | 0.0693 | 0.0000 | -0.2001 | 0.1105 | 0.0702 | -0.3964 | 0.0814 | 0.0000 |
| TG 62:1  | -0.0944 | 0.0752 | 0.2092 | -0.0822 | 0.0807 | 0.3089 | -0.6468 | 0.5411 | 0.2319 |
| TG 62:12 | -0.2027 | 0.0741 | 0.0062 | -0.0468 | 0.1088 | 0.6668 | -0.4071 | 0.0937 | 0.0000 |
| TG 62:14 | -0.2617 | 0.0711 | 0.0002 | -0.2094 | 0.1054 | 0.0469 | -0.3587 | 0.0934 | 0.0001 |
